# Supplementary material for: Design, Synthesis, Biological Evaluation, and Molecular Docking Study of 4,6-Dimethyl-5-aryl/alkyl-2-[2-hydroxy-3-(4-substituted-1-piperazinyl)propyl]pyrrolo[3,4-c]pyrrole-1,3(2H,5H)-diones as Anti-Inflammatory Agents with Dual Inhibition of COX and LOX
Source: MDPI journal article supplement (doi:10.3390/ph16060804), 2023-05-29

Figure S1. The intermolecular interactions of 3b in the active centre of a) COX-1 b)

COX-2 a)

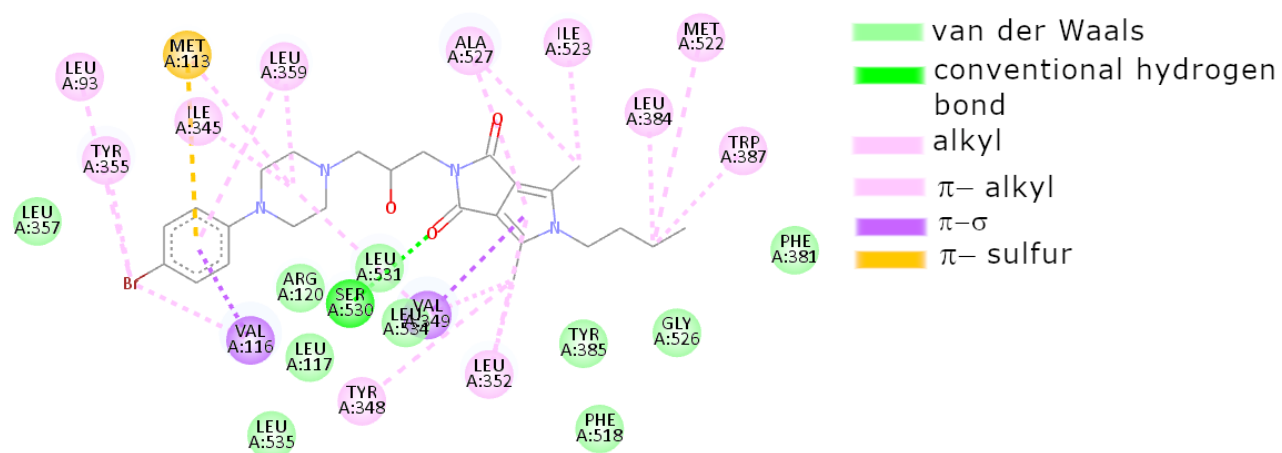

b)

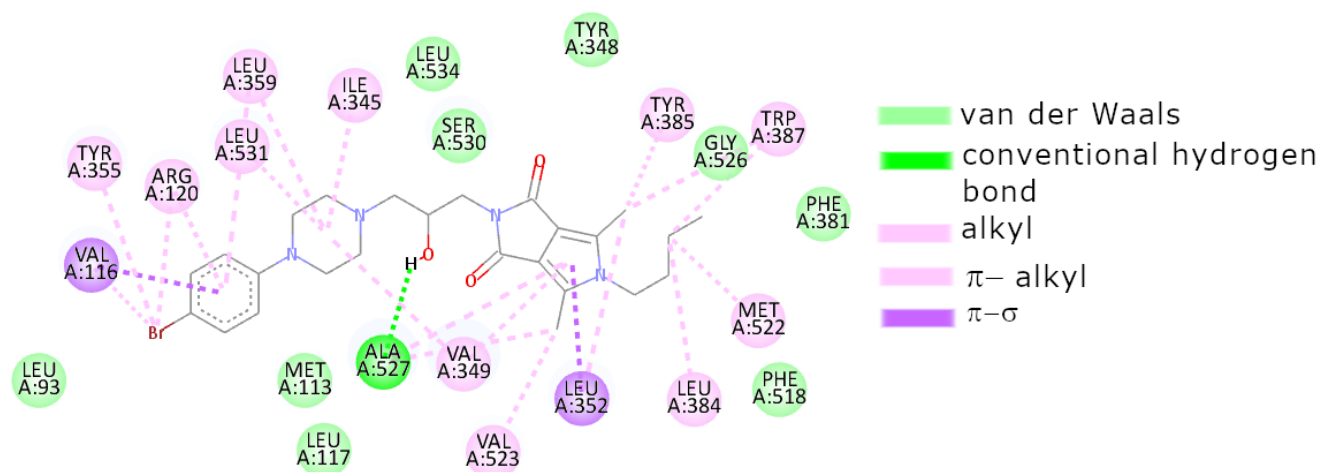

Figure S2. The intermolecular interactions of 3d in the active centre of a) COX-1 b)

COX-2 a)

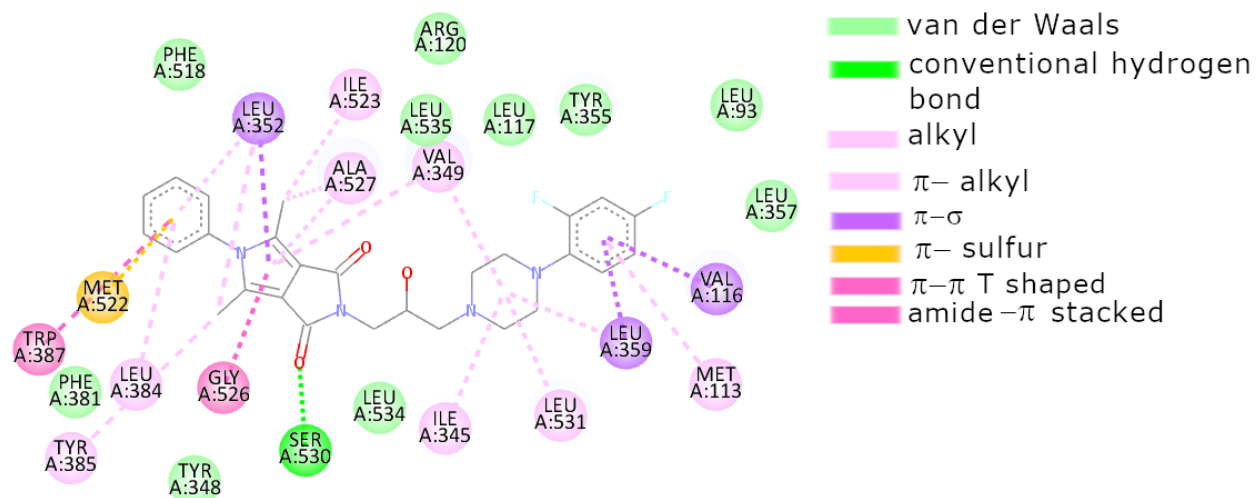

b)

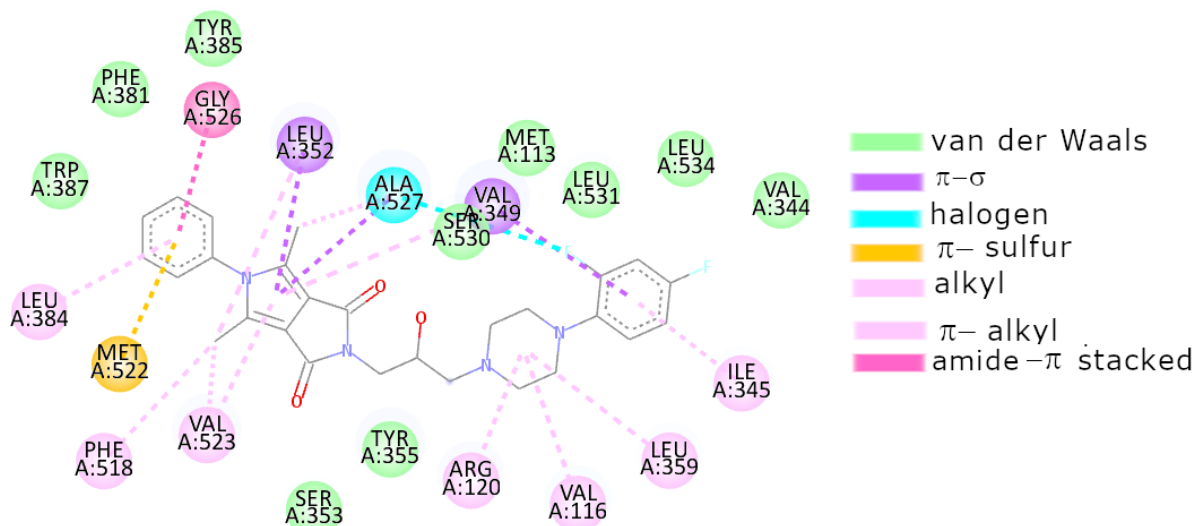

COX-2 a)

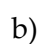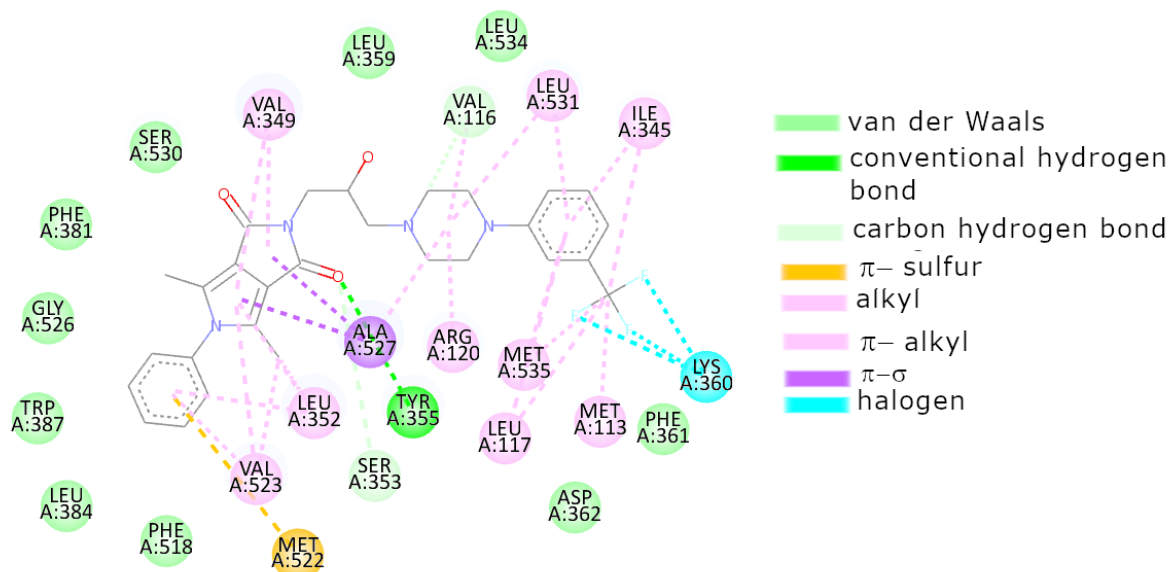

Figure S4. The intermolecular interactions of 3i in the active centre of a) COX-1 b)

COX-2 a)

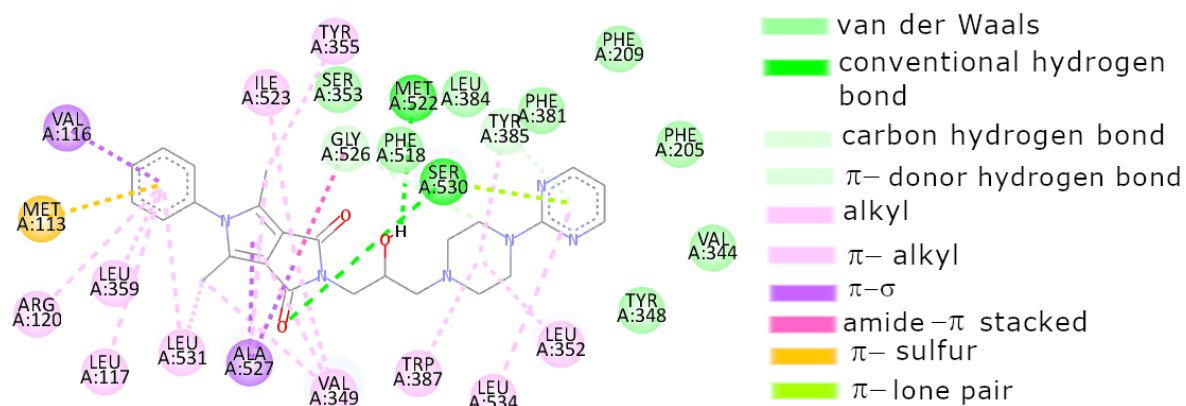

b)

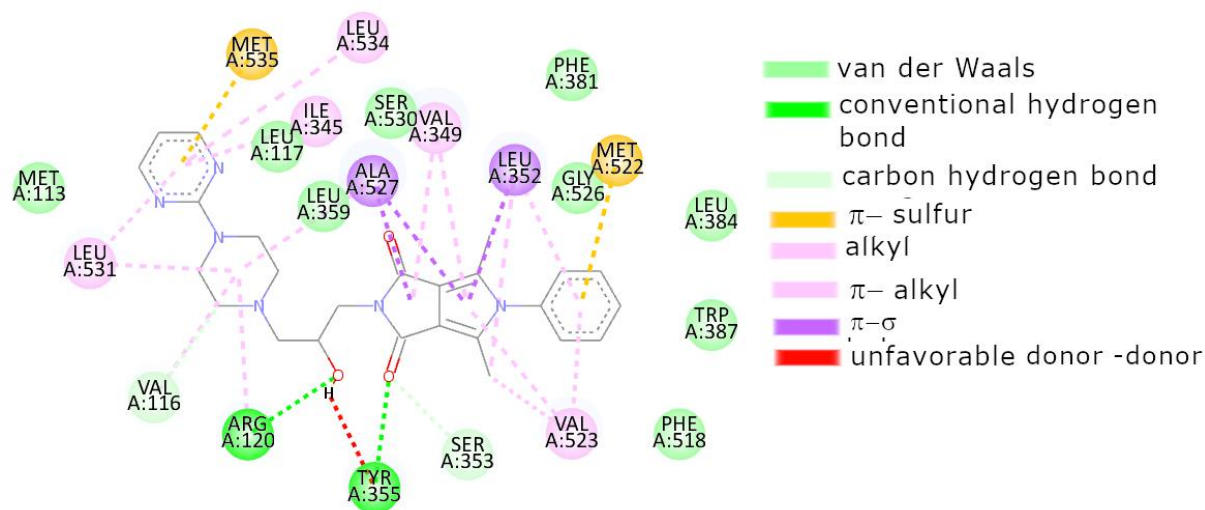

Figure S5. The intermolecular interactions of 3l in the active centre of a) COX-1 b) COX-2 a)

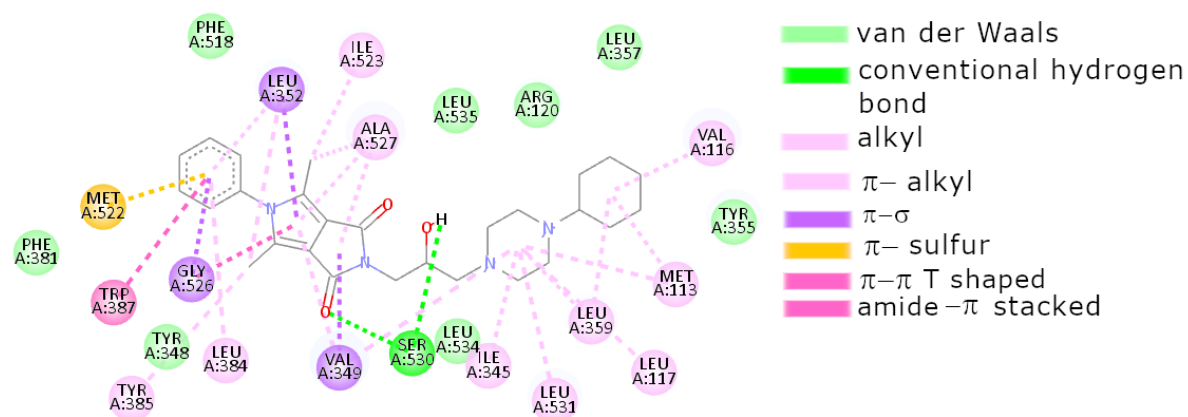

b)

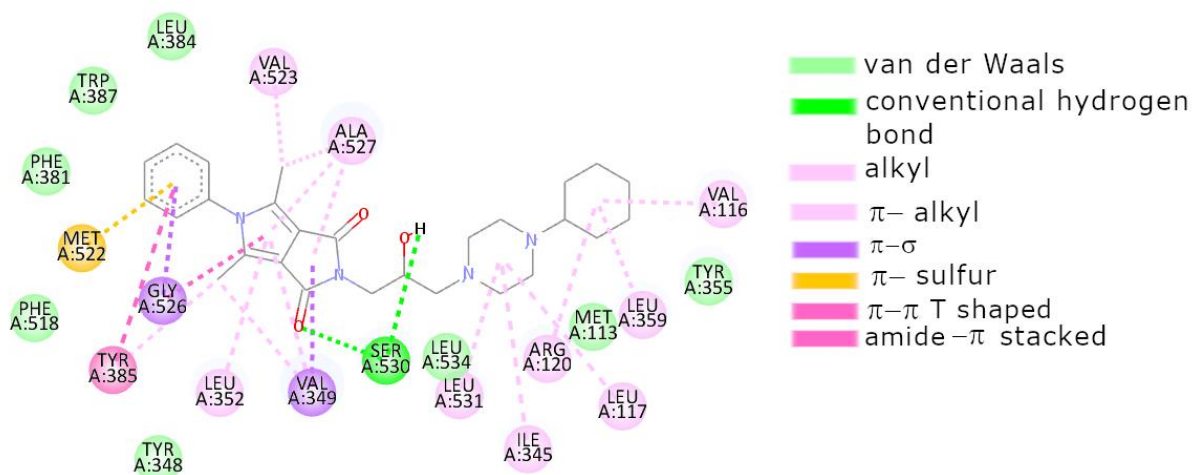

Figure S6. The intermolecular interactions of 3o in the active centre of a) COX-1 b)

COX-2 a)

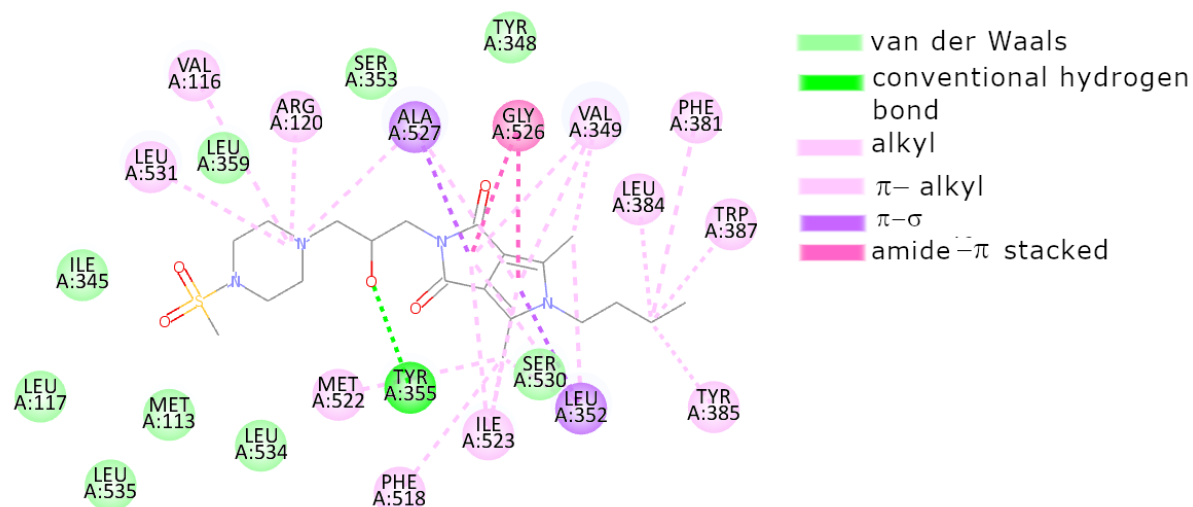

b)

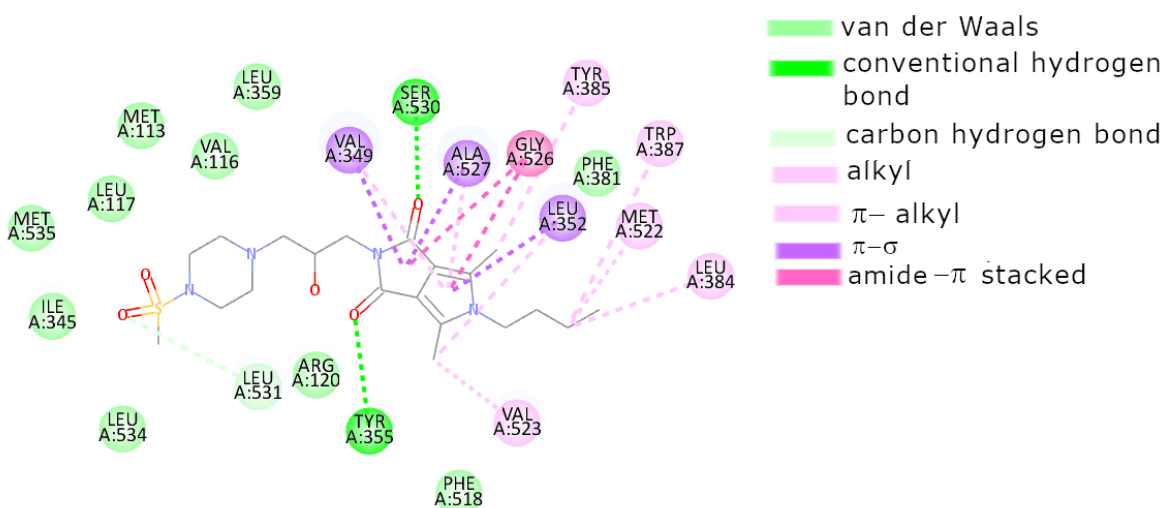

3a C

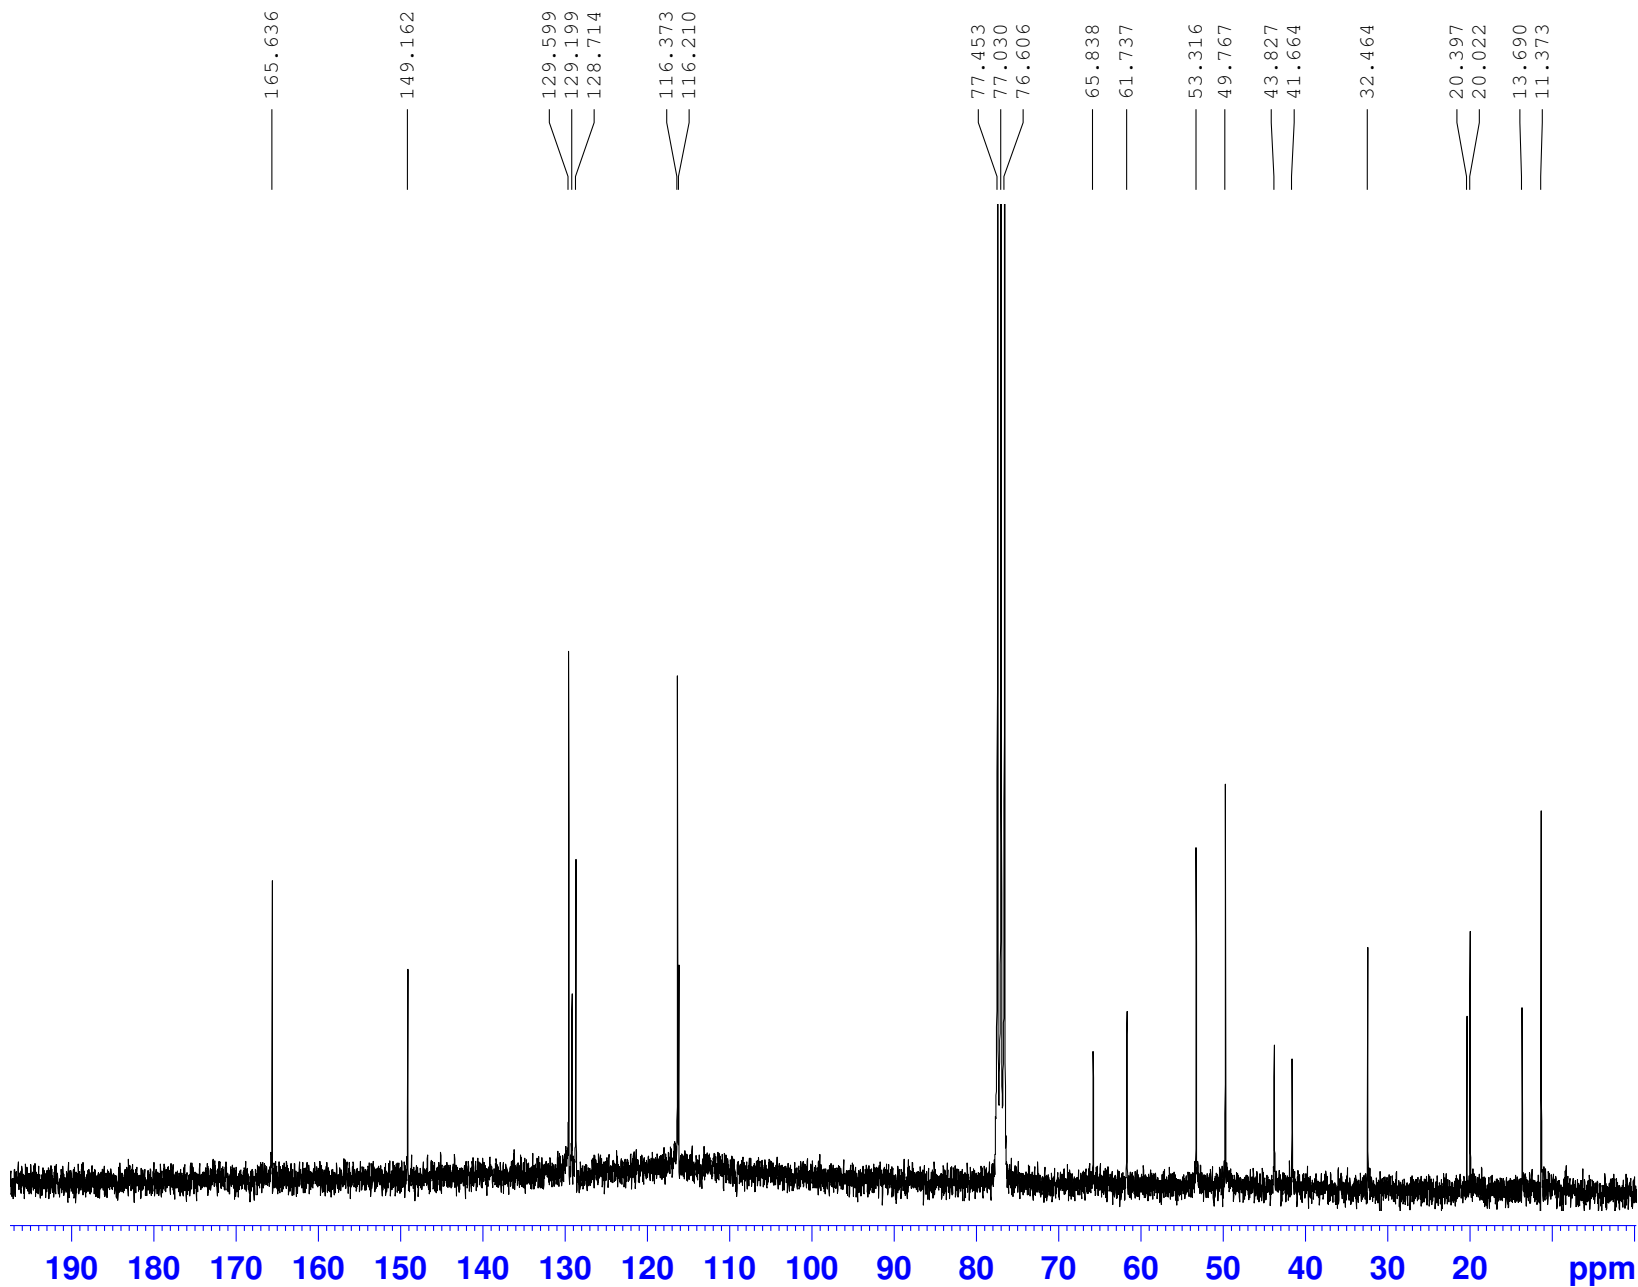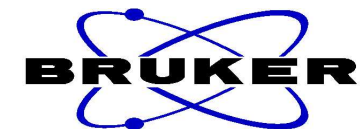

Current Data Parameters  
NAME Redzicka 1018  
EXPNO 2  
PROCNO 1

F2 - Acquisition Parameters  
Date\_ 20210721  
Time 15.12  
INSTRUM spect  
PROBHD 5 mm BBI 1H/D-  
PULPROG zgpg30  
TD 65536  
SOLVENT CDCl3  
NS 4096  
DS 2  
SWH 17985.611 Hz  
FIDRES 0.274439 Hz  
AQ 1.8219508 sec  
RG 18390.4  
DW 27.800 usec  
DE 20.00 usec  
TE 299.1 K  
D1 2.00000000 sec  
d11 0.03000000 sec  
DELTA 1.89999998 sec  
TD0 1

===== CHANNEL f1 =====  
NUC1 13C  
P1 11.90 usec  
PL1 -6.00 dB  
SFO1 75.4803248 MHz

===== CHANNEL f2 =====  
CPDPRG2 waltz16  
NUC2 1H  
PCPD2 100.00 usec  
PL2 2.00 dB  
PL12 21.66 dB  
PL13 23.00 dB  
SFO2 300.1512006 MHz

F2 - Processing parameters  
SI 32768  
SF 75.4727782 MHz  
WDW EM  
SSB 0  
LB 1.00 Hz  
GB 0  
PC 2.00

3a H

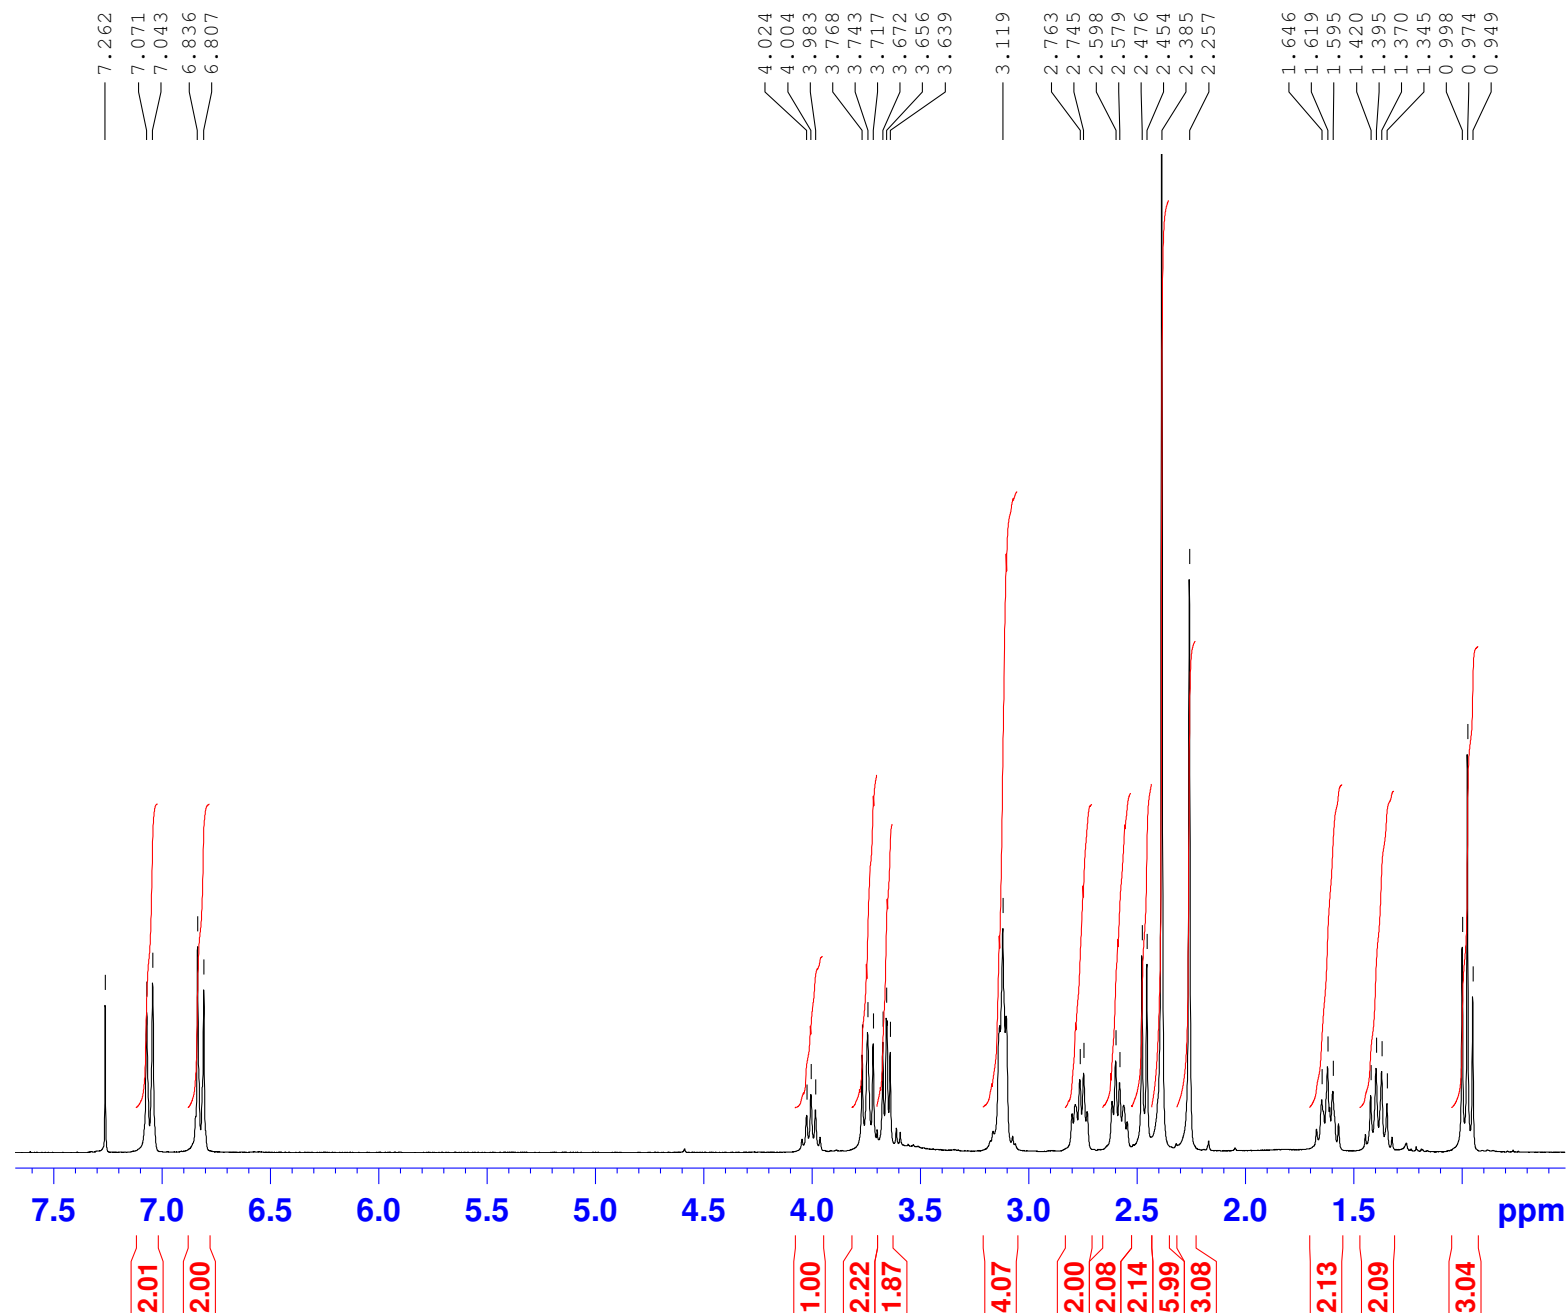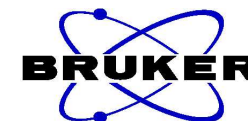

Current Data Parameters  
 NAME Redzicka 1018  
 EXPNO 1  
 PROCNO 1

F2 - Acquisition Parameters  
 Date\_ 20210721  
 Time 10.44  
 INSTRUM spect  
 PROBHD 5 mm BBI 1H/D-  
 PULPROG zg30  
 TD 65536  
 SOLVENT CDCl3  
 NS 16  
 DS 0  
 SWH 6172.839 Hz  
 FIDRES 0.094190 Hz  
 AQ 5.3084660 sec  
 RG 228.1  
 DW 81.000 usec  
 DE 8.00 usec  
 TE 298.1 K  
 D1 1.00000000 sec  
 TD0 1

===== CHANNEL f1 =====  
 NUC1 1H  
 P1 10.40 usec  
 PL1 2.00 dB  
 SFO1 300.1518535 MHz

F2 - Processing parameters  
 SI 32768  
 SF 300.1500045 MHz  
 WDW EM  
 SSB 0  
 LB 0.30 Hz  
 GB 0  
 PC 20.00



3b C

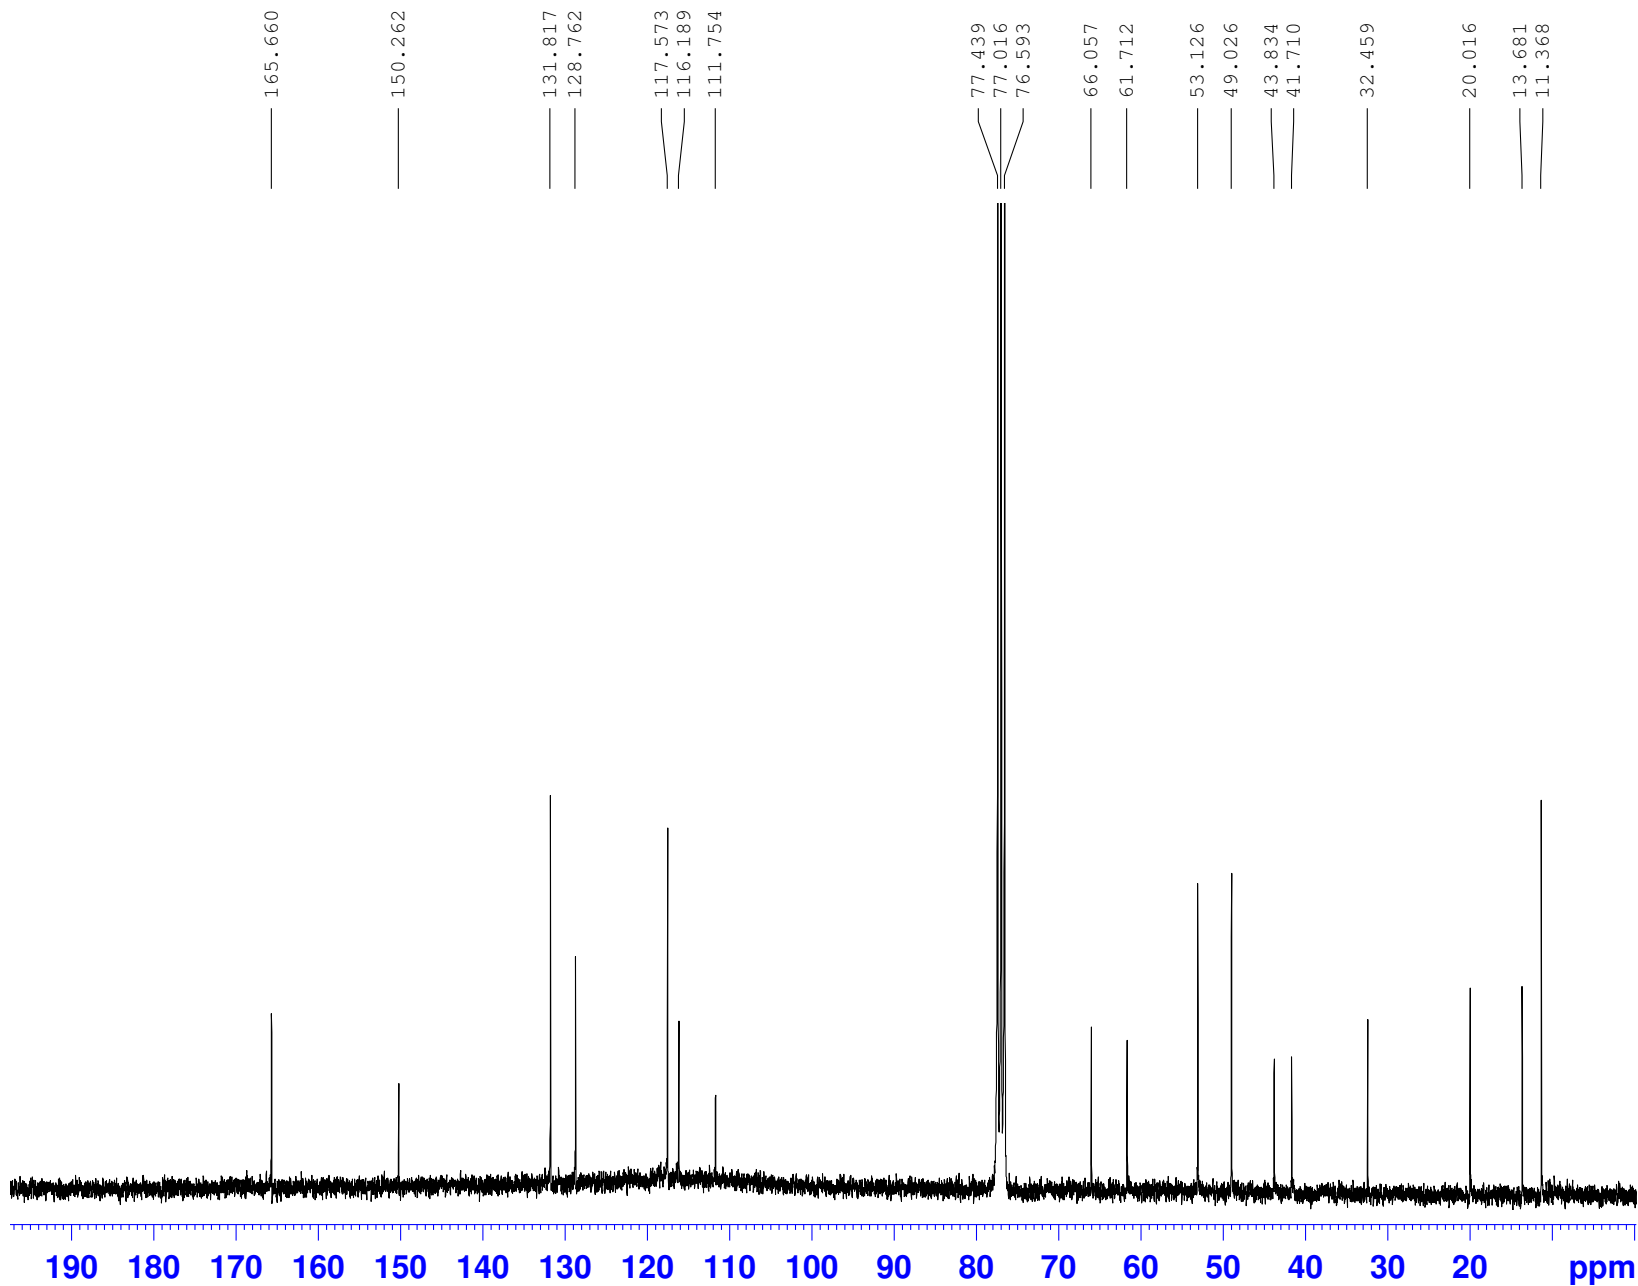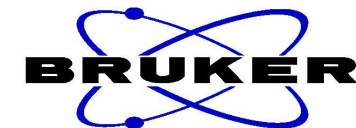

Current Data Parameters  
 NAME Redzicka 1016  
 EXPNO 2  
 PROCNO 1

F2 - Acquisition Parameters  
 Date\_ 20210720  
 Time 15.35  
 INSTRUM spect  
 PROBHD 5 mm BBI 1H/D-  
 PULPROG zgpg30  
 TD 65536  
 SOLVENT CDCl3  
 NS 5120  
 DS 2  
 SWH 17985.611 Hz  
 FIDRES 0.274439 Hz  
 AQ 1.8219508 sec  
 RG 16384  
 DW 27.800 usec  
 DE 20.00 usec  
 TE 299.3 K  
 D1 2.00000000 sec  
 d11 0.03000000 sec  
 DELTA 1.89999998 sec  
 TD0 1

===== CHANNEL f1 =====  
 NUC1 13C  
 P1 11.90 usec  
 PL1 -6.00 dB  
 SFO1 75.4803248 MHz

===== CHANNEL f2 =====  
 CPDPRG2 waltz16  
 NUC2 1H  
 PCPD2 100.00 usec  
 PL2 2.00 dB  
 PL12 21.66 dB  
 PL13 23.00 dB  
 SFO2 300.1512006 MHz

F2 - Processing parameters  
 SI 32768  
 SF 75.4727782 MHz  
 WDW EM  
 SSB 0  
 LB 1.00 Hz  
 GB 0  
 PC 2.00

3b H

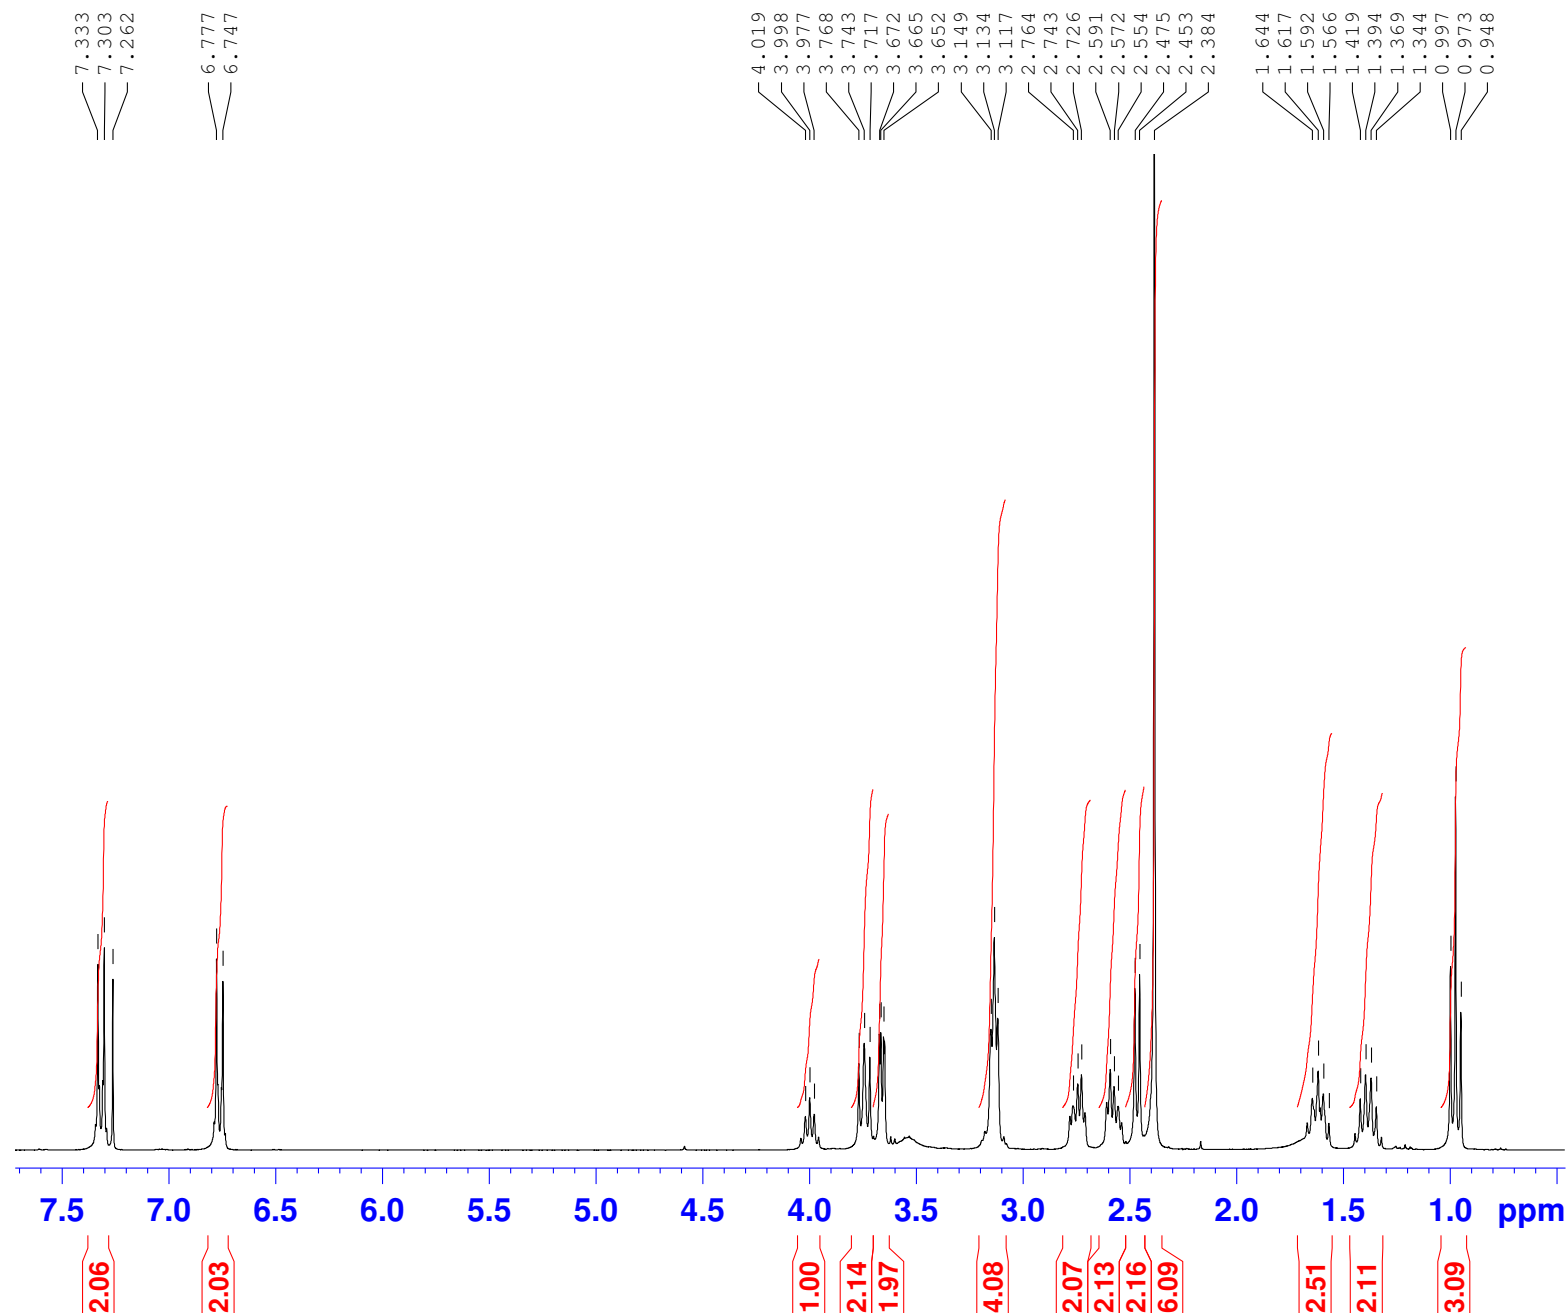

Current Data Parameters  
 NAME Redzicka 1016  
 EXPNO 1  
 PROCNO 1

F2 - Acquisition Parameters  
 Date\_ 20210720  
 Time 10.00  
 INSTRUM spect  
 PROBHD 5 mm BBI 1H/D-  
 PULPROG zg30  
 TD 65536  
 SOLVENT CDCl3  
 NS 16  
 DS 0  
 SWH 6172.839 Hz  
 FIDRES 0.094190 Hz  
 AQ 5.3084660 sec  
 RG 203.2  
 DW 81.000 usec  
 DE 8.00 usec  
 TE 298.1 K  
 D1 1.00000000 sec  
 TD0 1

===== CHANNEL f1 =====  
 NUC1 1H  
 P1 10.40 usec  
 PL1 2.00 dB  
 SFO1 300.1518535 MHz

F2 - Processing parameters  
 SI 32768  
 SF 300.1500045 MHz  
 WDW EM  
 SSB 0  
 LB 0.30 Hz  
 GB 0  
 PC 20.00

3c C

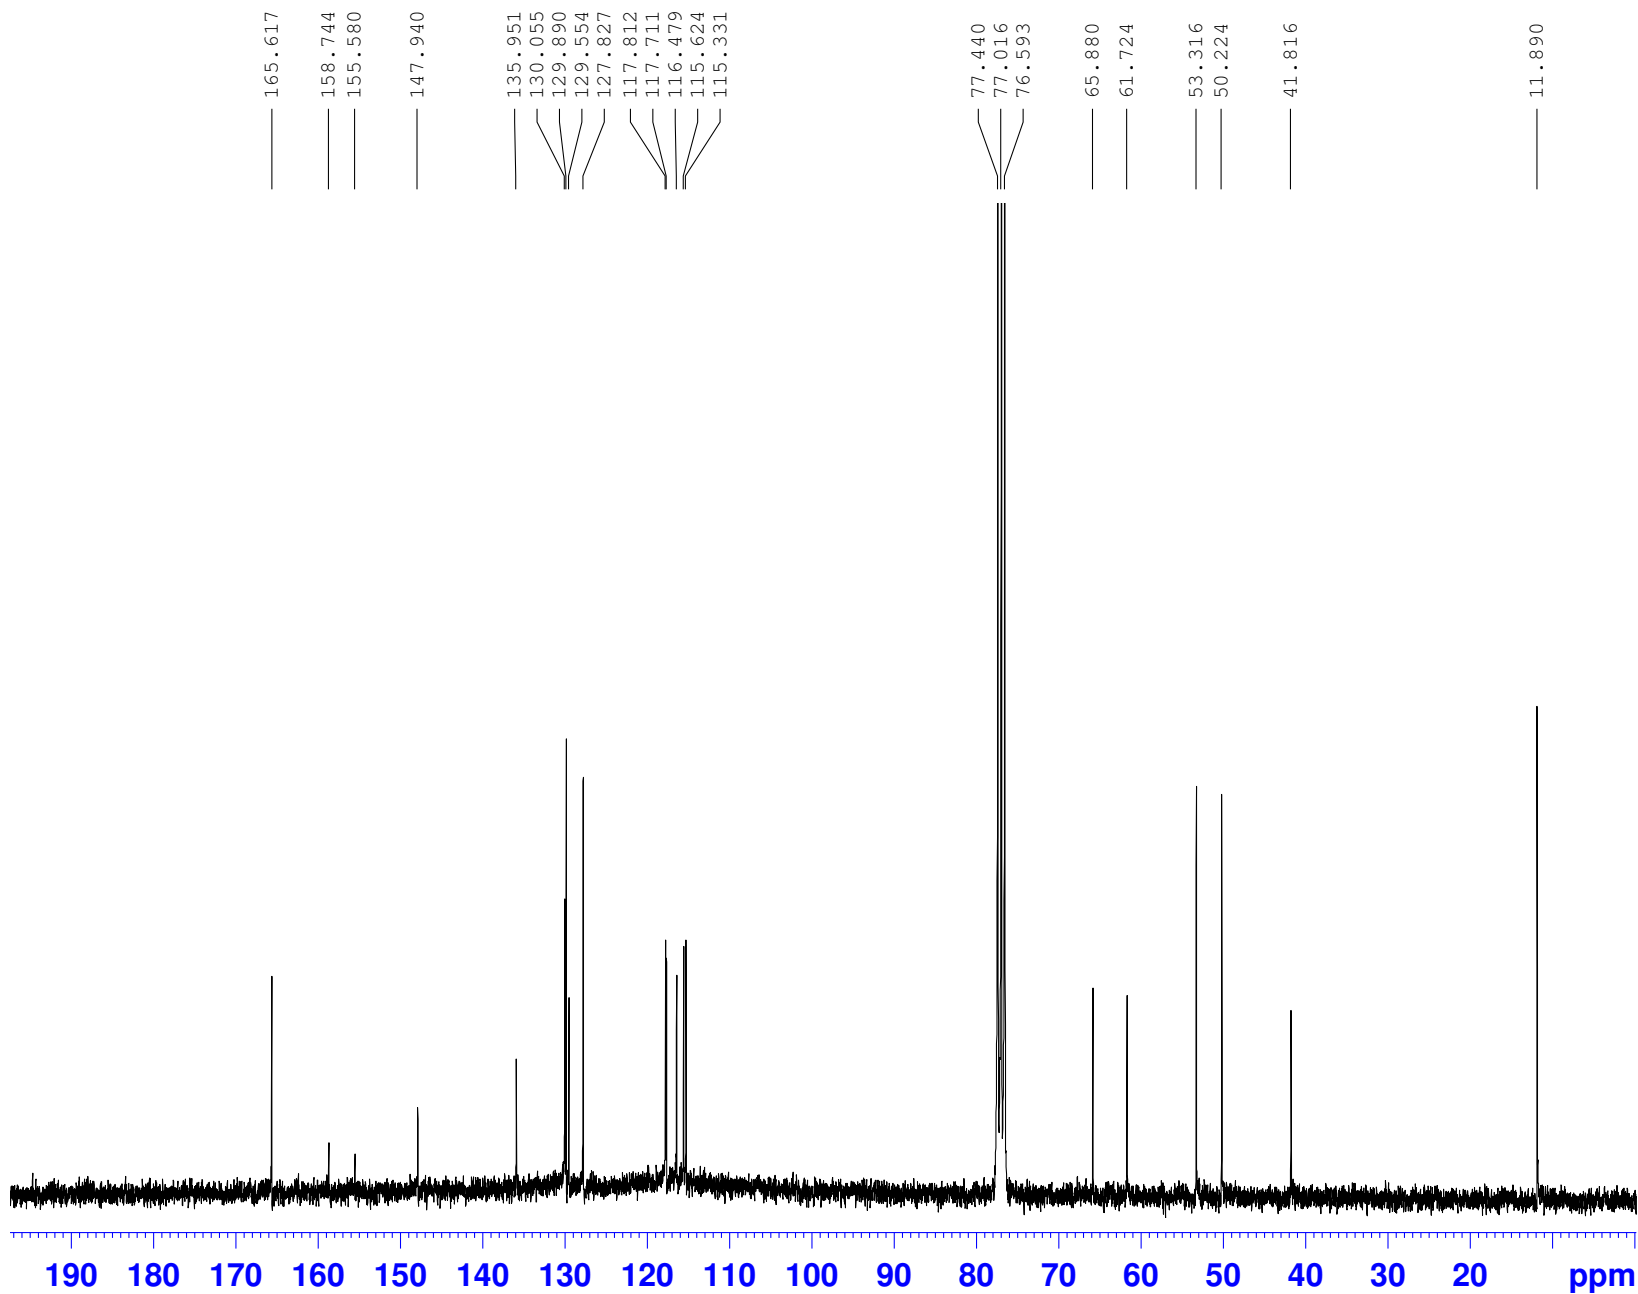

Current Data Parameters  
 NAME Redzicka 1015  
 EXPNO 2  
 PROCNO 1

F2 - Acquisition Parameters  
 Date\_ 20210719  
 Time 22.16  
 INSTRUM spect  
 PROBHD 5 mm BBI 1H/D-  
 PULPROG zgpg30  
 TD 65536  
 SOLVENT CDCl3  
 NS 5120  
 DS 2  
 SWH 17985.611 Hz  
 FIDRES 0.274439 Hz  
 AQ 1.8219508 sec  
 RG 23170.5  
 DW 27.800 usec  
 DE 20.00 usec  
 TE 299.4 K  
 D1 2.00000000 sec  
 d11 0.03000000 sec  
 DELTA 1.89999998 sec  
 TD0 1

===== CHANNEL f1 =====  
 NUC1 13C  
 P1 11.90 usec  
 PL1 -6.00 dB  
 SFO1 75.4803248 MHz

===== CHANNEL f2 =====  
 CPDPRG2 waltz16  
 NUC2 1H  
 PCPD2 100.00 usec  
 PL2 2.00 dB  
 PL12 21.66 dB  
 PL13 23.00 dB  
 SFO2 300.1512006 MHz

F2 - Processing parameters  
 SI 32768  
 SF 75.4727782 MHz  
 WDW EM  
 SSB 0  
 LB 1.00 Hz  
 GB 0  
 PC 2.00

3c H

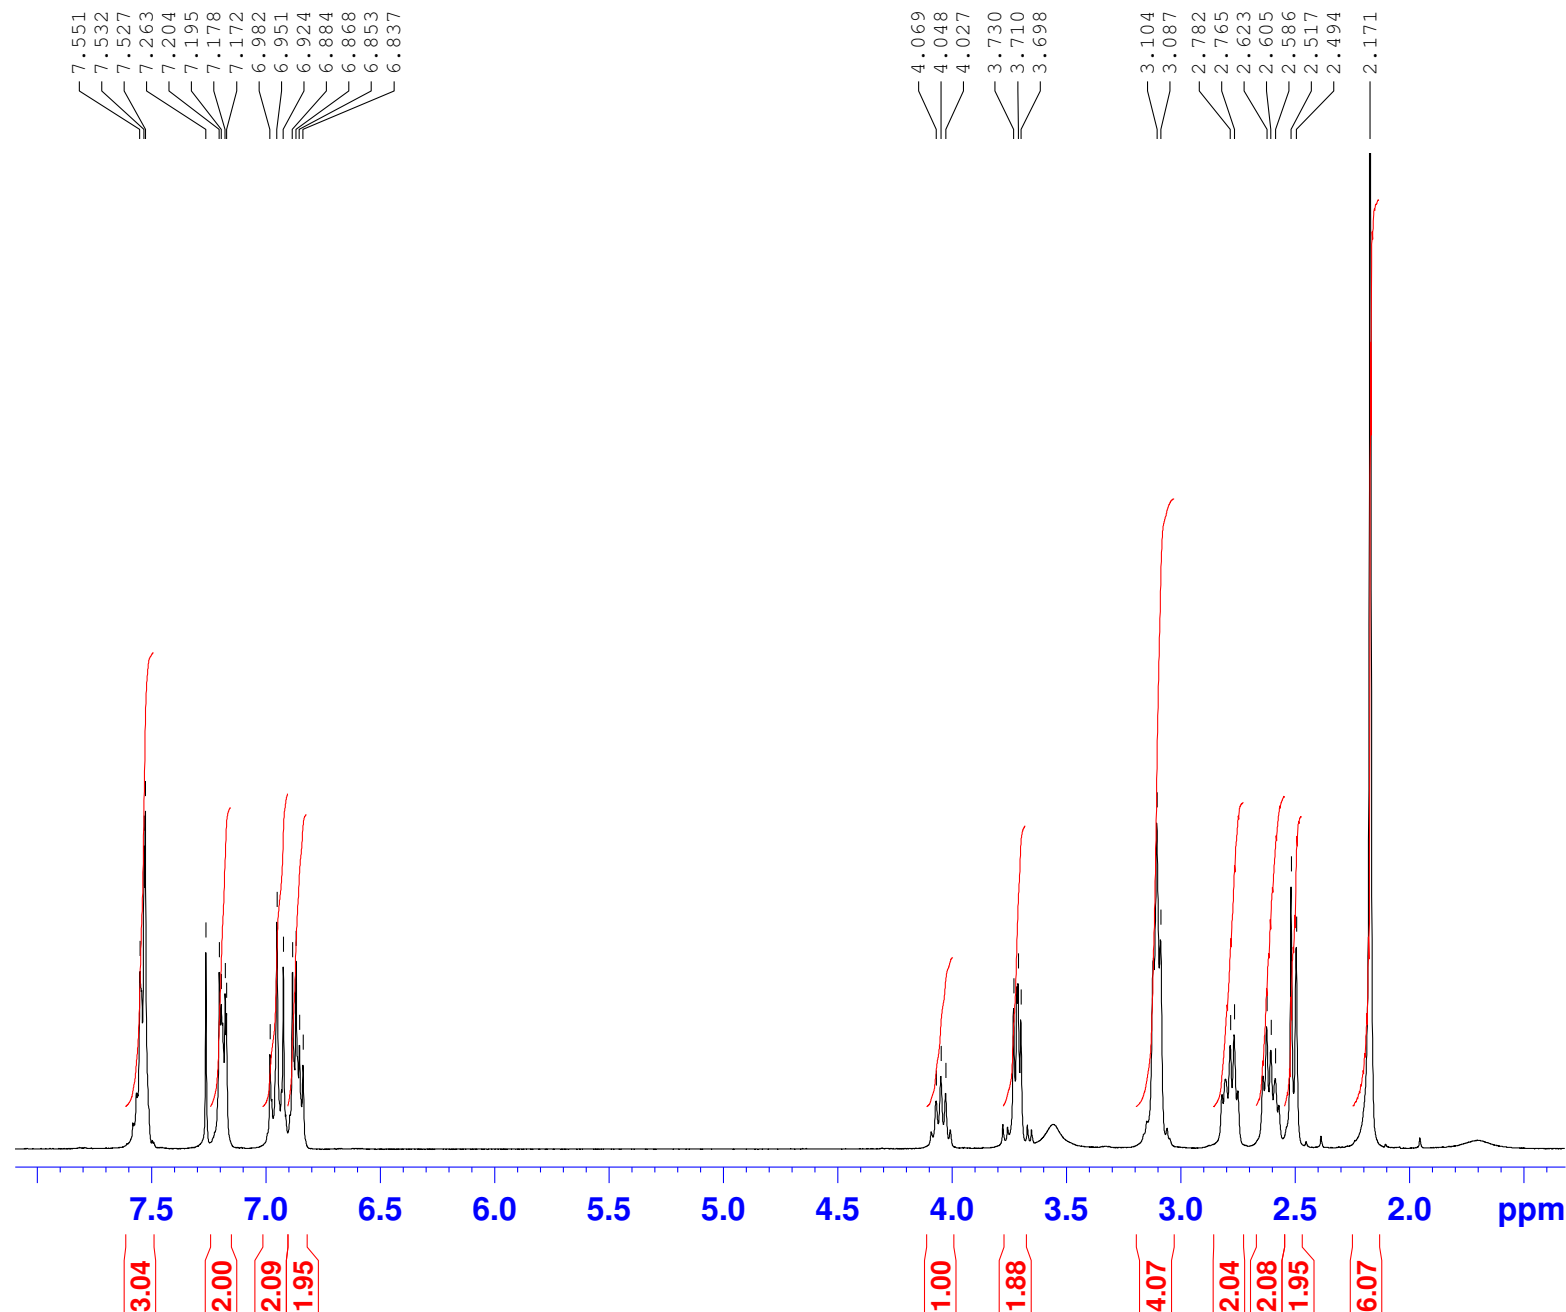

Current Data Parameters  
 NAME Redzicka 1015  
 EXPNO 1  
 PROCNO 1

F2 - Acquisition Parameters  
 Date\_ 20210719  
 Time 16.42  
 INSTRUM spect  
 PROBHD 5 mm BBI 1H/D-  
 PULPROG zg30  
 TD 65536  
 SOLVENT CDCl3  
 NS 16  
 DS 0  
 SWH 6172.839 Hz  
 FIDRES 0.094190 Hz  
 AQ 5.3084660 sec  
 RG 228.1  
 DW 81.000 usec  
 DE 8.00 usec  
 TE 298.1 K  
 D1 1.00000000 sec  
 TD0 1

===== CHANNEL f1 =====  
 NUC1 1H  
 P1 10.40 usec  
 PL1 2.00 dB  
 SFO1 300.1518535 MHz

F2 - Processing parameters  
 SI 32768  
 SF 300.1500045 MHz  
 WDW EM  
 SSB 0  
 LB 0.30 Hz  
 GB 0  
 PC 20.00

3d c

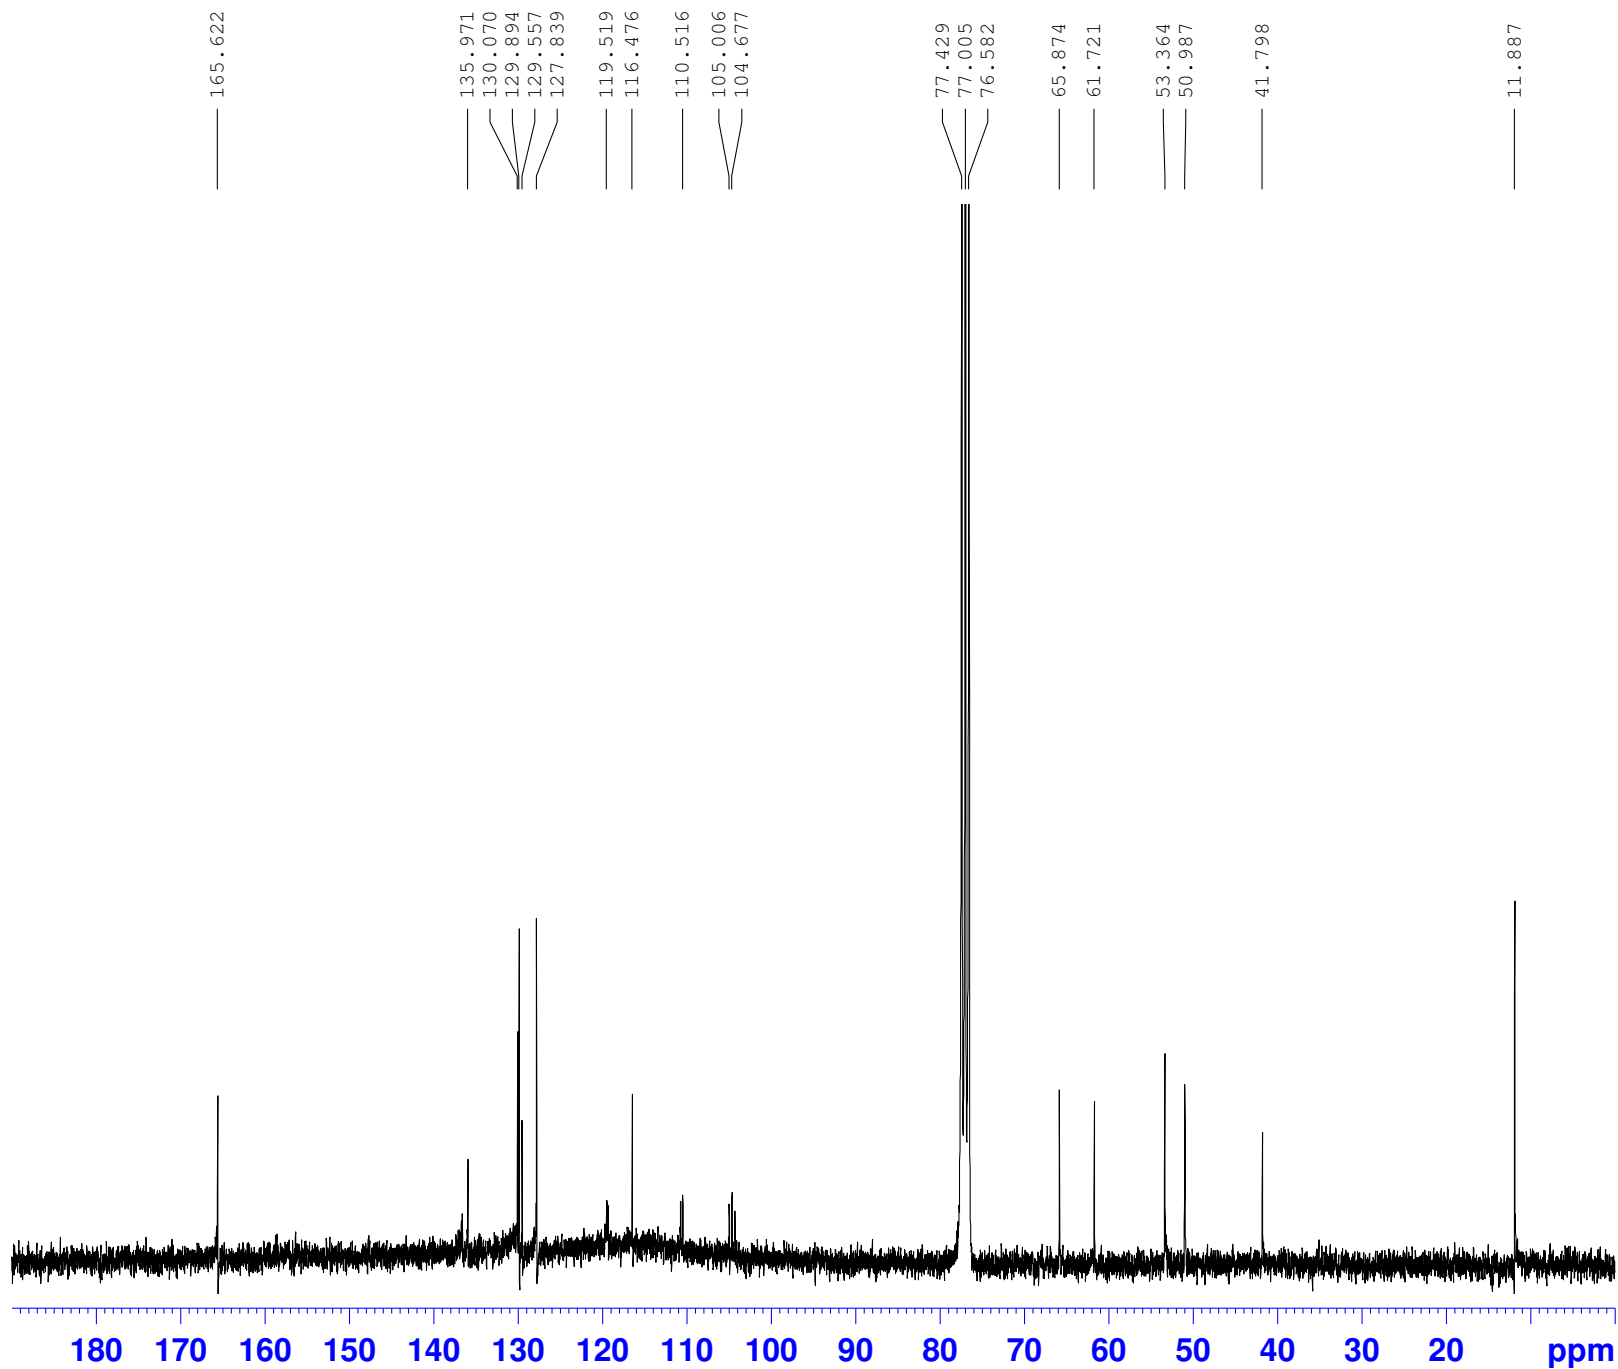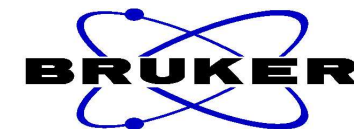

Current Data Parameters  
NAME Redzicka 1114  
EXPNO 2  
PROCNO 1

F2 - Acquisition Parameters  
Date\_ 20210826  
Time 3.08  
INSTRUM spect  
PROBHD 5 mm BBI 1H/D-  
PULPROG zgpg30  
TD 65536  
SOLVENT CDCl3  
NS 10240  
DS 2  
SWH 17985.611 Hz  
FIDRES 0.274439 Hz  
AQ 1.8219508 sec  
RG 11585.2  
DW 27.800 usec  
DE 20.00 usec  
TE 299.6 K  
D1 2.00000000 sec  
d11 0.03000000 sec  
DELTA 1.89999998 sec  
TD0 1

===== CHANNEL f1 =====  
NUC1 13C  
P1 11.00 usec  
PL1 -6.00 dB  
SFO1 75.4803248 MHz

===== CHANNEL f2 =====  
CPDPRG2 waltz16  
NUC2 1H  
PCPD2 100.00 usec  
PL2 2.00 dB  
PL12 21.45 dB  
PL13 23.00 dB  
SFO2 300.1512006 MHz

F2 - Processing parameters  
SI 32768  
SF 75.4727780 MHz  
WDW EM  
SSB 0  
LB 1.00 Hz  
GB 0  
PC 2.00

3d H

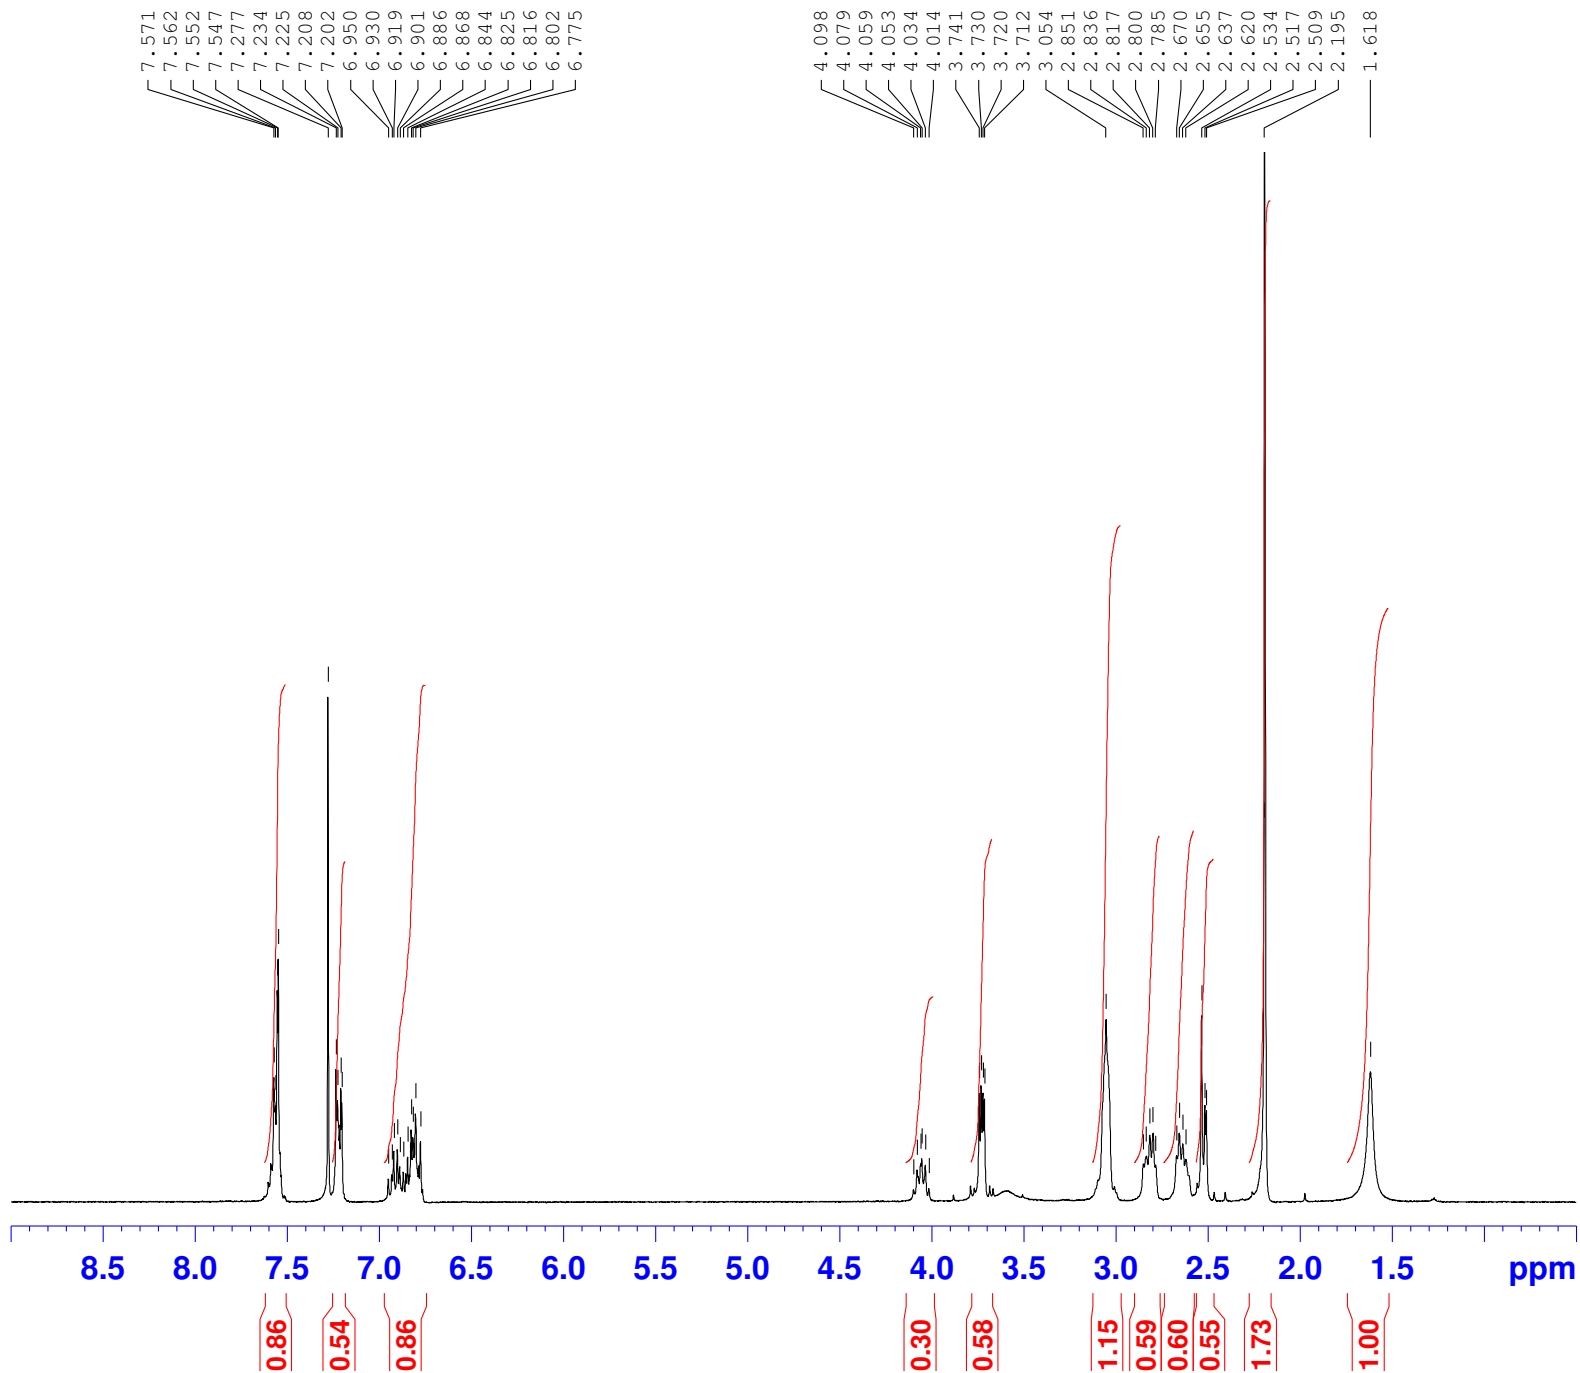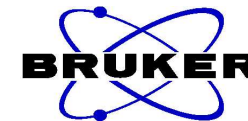

Current Data Parameters  
NAME Redzicka 1114  
EXPNO 1  
PROCNO 1

F2 - Acquisition Parameters  
Date\_ 20210825  
Time 16.04  
INSTRUM spect  
PROBHD 5 mm BBI 1H/D-  
PULPROG zg30  
TD 65536  
SOLVENT CDCl3  
NS 16  
DS 0  
SWH 6172.839 Hz  
FIDRES 0.094190 Hz  
AQ 5.3084660 sec  
RG 456.1  
DW 81.000 usec  
DE 8.00 usec  
TE 298.4 K  
D1 1.00000000 sec  
TD0 1

===== CHANNEL f1 =====  
NUC1 1H  
P1 11.00 usec  
PL1 2.50 dB  
SFO1 300.1518535 MHz

F2 - Processing parameters  
SI 32768  
SF 300.150000 MHz  
WDW EM  
SSB 0  
LB 0.30 Hz  
GB 0  
PC 1.00

3e C

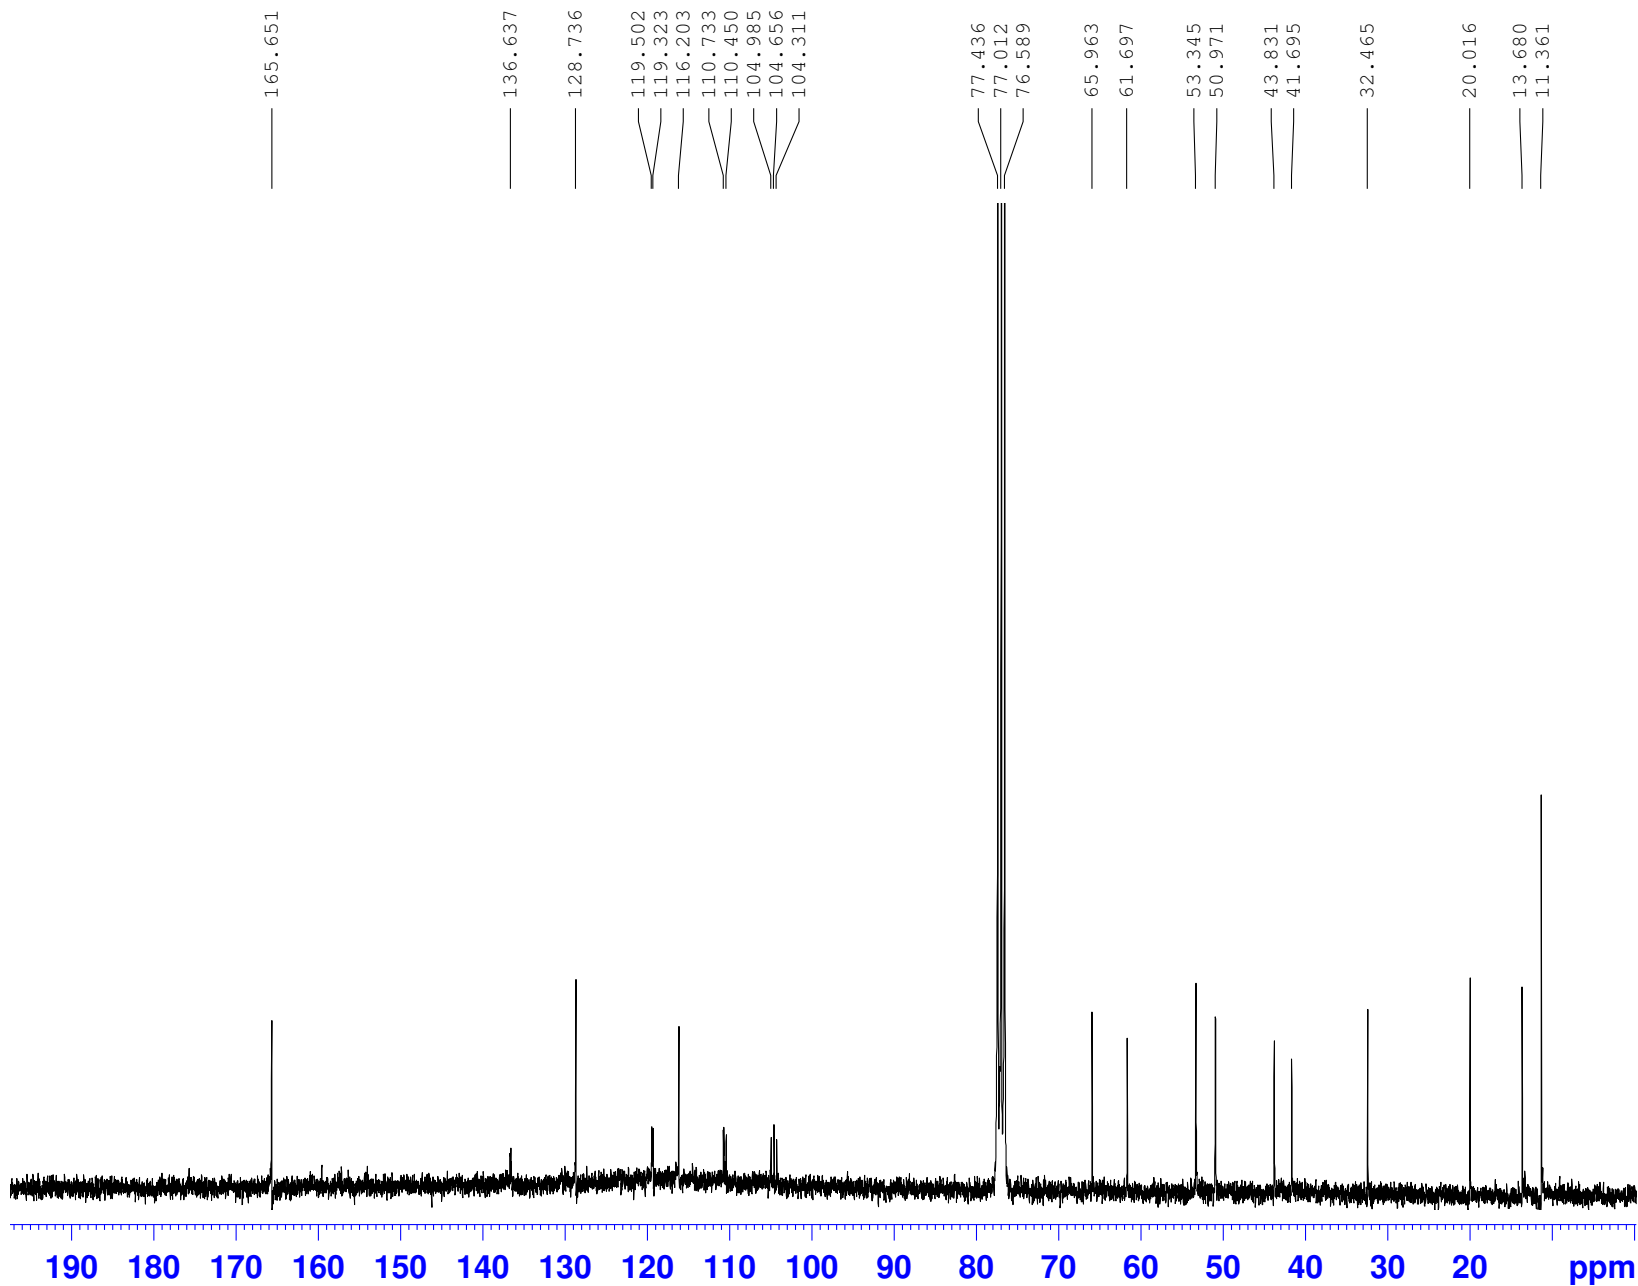

Current Data Parameters  
 NAME Redzicka 1020  
 EXPNO 2  
 PROCNO 1

F2 - Acquisition Parameters  
 Date\_ 20210722  
 Time 15.43  
 INSTRUM spect  
 PROBHD 5 mm BBI 1H/D-  
 PULPROG zgpg30  
 TD 65536  
 SOLVENT CDCl3  
 NS 5120  
 DS 2  
 SWH 17985.611 Hz  
 FIDRES 0.274439 Hz  
 AQ 1.8219508 sec  
 RG 18390.4  
 DW 27.800 usec  
 DE 20.00 usec  
 TE 299.2 K  
 D1 2.00000000 sec  
 d11 0.03000000 sec  
 DELTA 1.89999998 sec  
 TD0 1

===== CHANNEL f1 =====  
 NUC1 13C  
 P1 11.90 usec  
 PL1 -6.00 dB  
 SFO1 75.4803248 MHz

===== CHANNEL f2 =====  
 CPDPRG2 waltz16  
 NUC2 1H  
 PCPD2 100.00 usec  
 PL2 2.00 dB  
 PL12 21.66 dB  
 PL13 23.00 dB  
 SFO2 300.1512006 MHz

F2 - Processing parameters  
 SI 32768  
 SF 75.4727782 MHz  
 WDW EM  
 SSB 0  
 LB 1.00 Hz  
 GB 0  
 PC 2.00

3e H

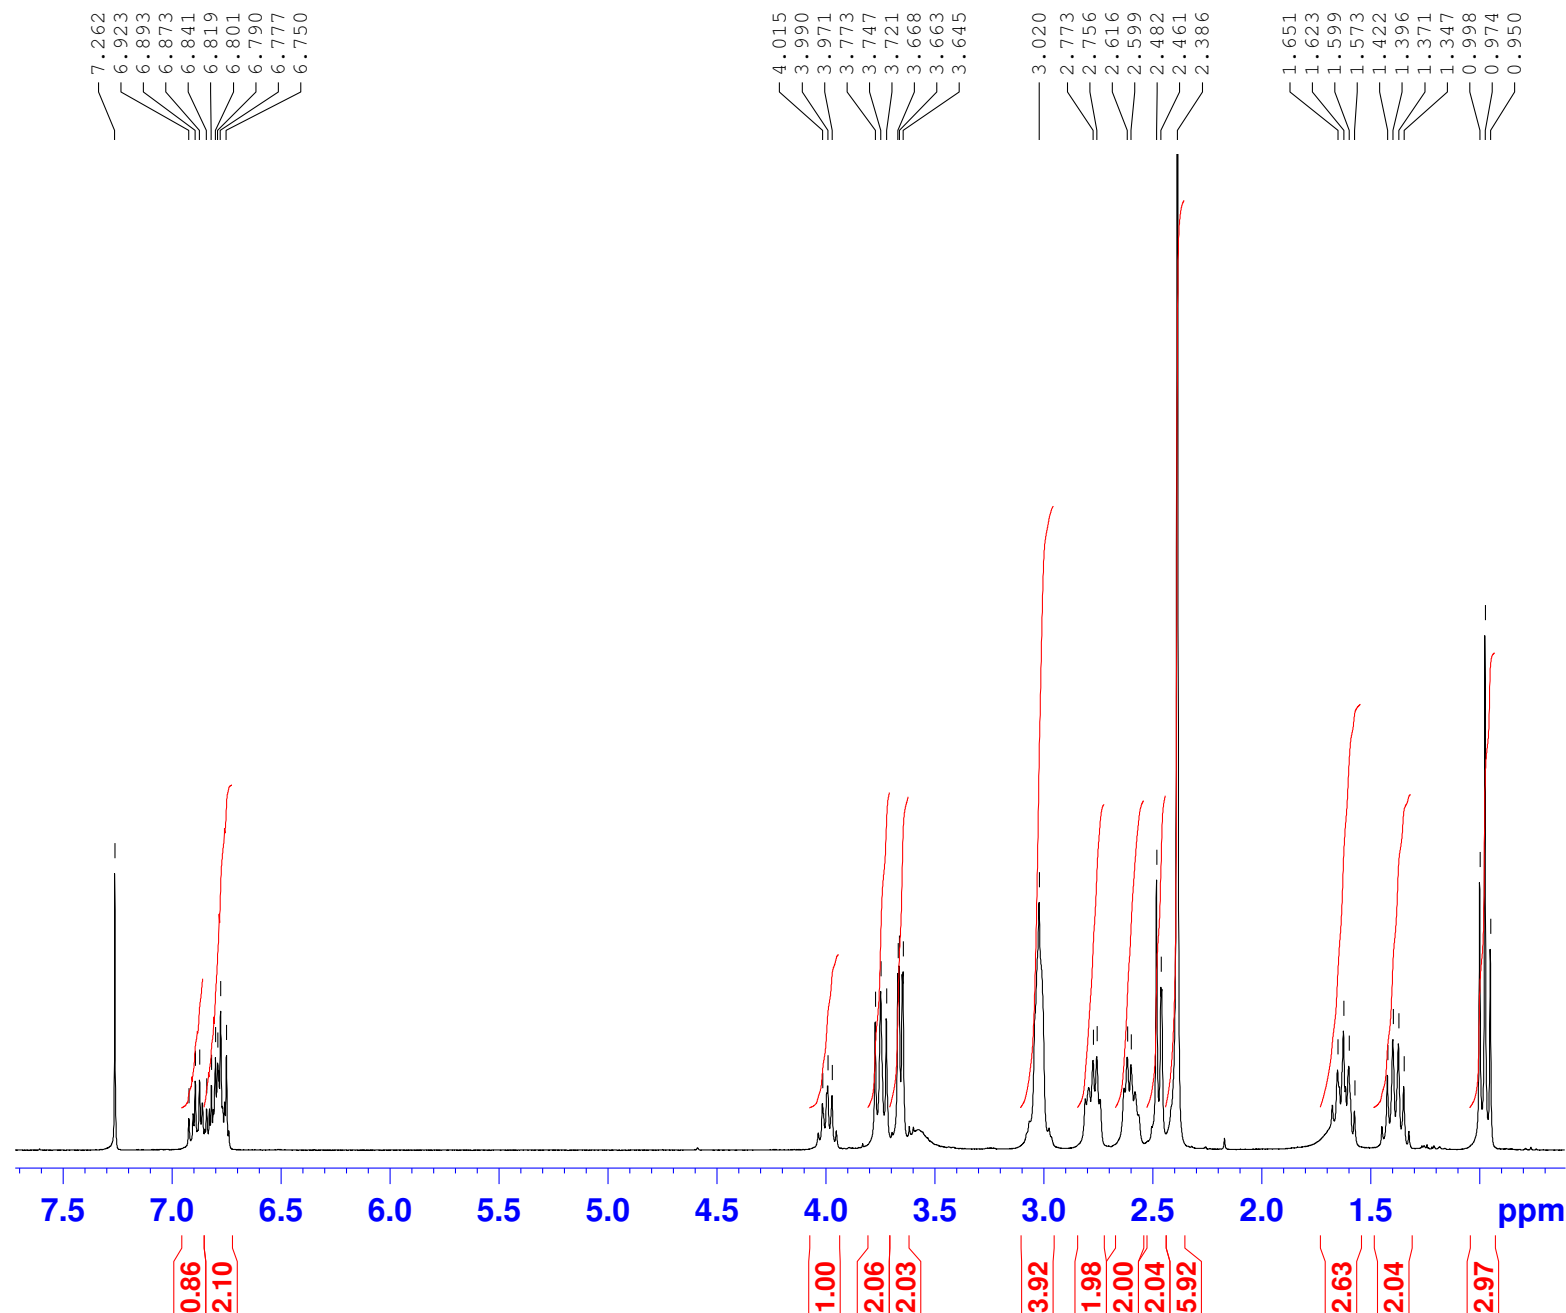

Current Data Parameters  
 NAME Redzicka 1020  
 EXPNO 1  
 PROCNO 1

F2 - Acquisition Parameters  
 Date\_ 20210722  
 Time 10.06  
 INSTRUM spect  
 PROBHD 5 mm BBI 1H/D-  
 PULPROG zg30  
 TD 65536  
 SOLVENT CDC13  
 NS 16  
 DS 0  
 SWH 6172.839 Hz  
 FIDRES 0.094190 Hz  
 AQ 5.3084660 sec  
 RG 228.1  
 DW 81.000 usec  
 DE 8.00 usec  
 TE 298.1 K  
 D1 1.00000000 sec  
 TD0 1

===== CHANNEL f1 =====  
 NUC1 1H  
 P1 10.40 usec  
 PL1 2.00 dB  
 SFO1 300.1518535 MHz

F2 - Processing parameters  
 SI 32768  
 SF 300.1500045 MHz  
 WDW EM  
 SSB 0  
 LB 0.30 Hz  
 GB 0  
 PC 20.00



3f C

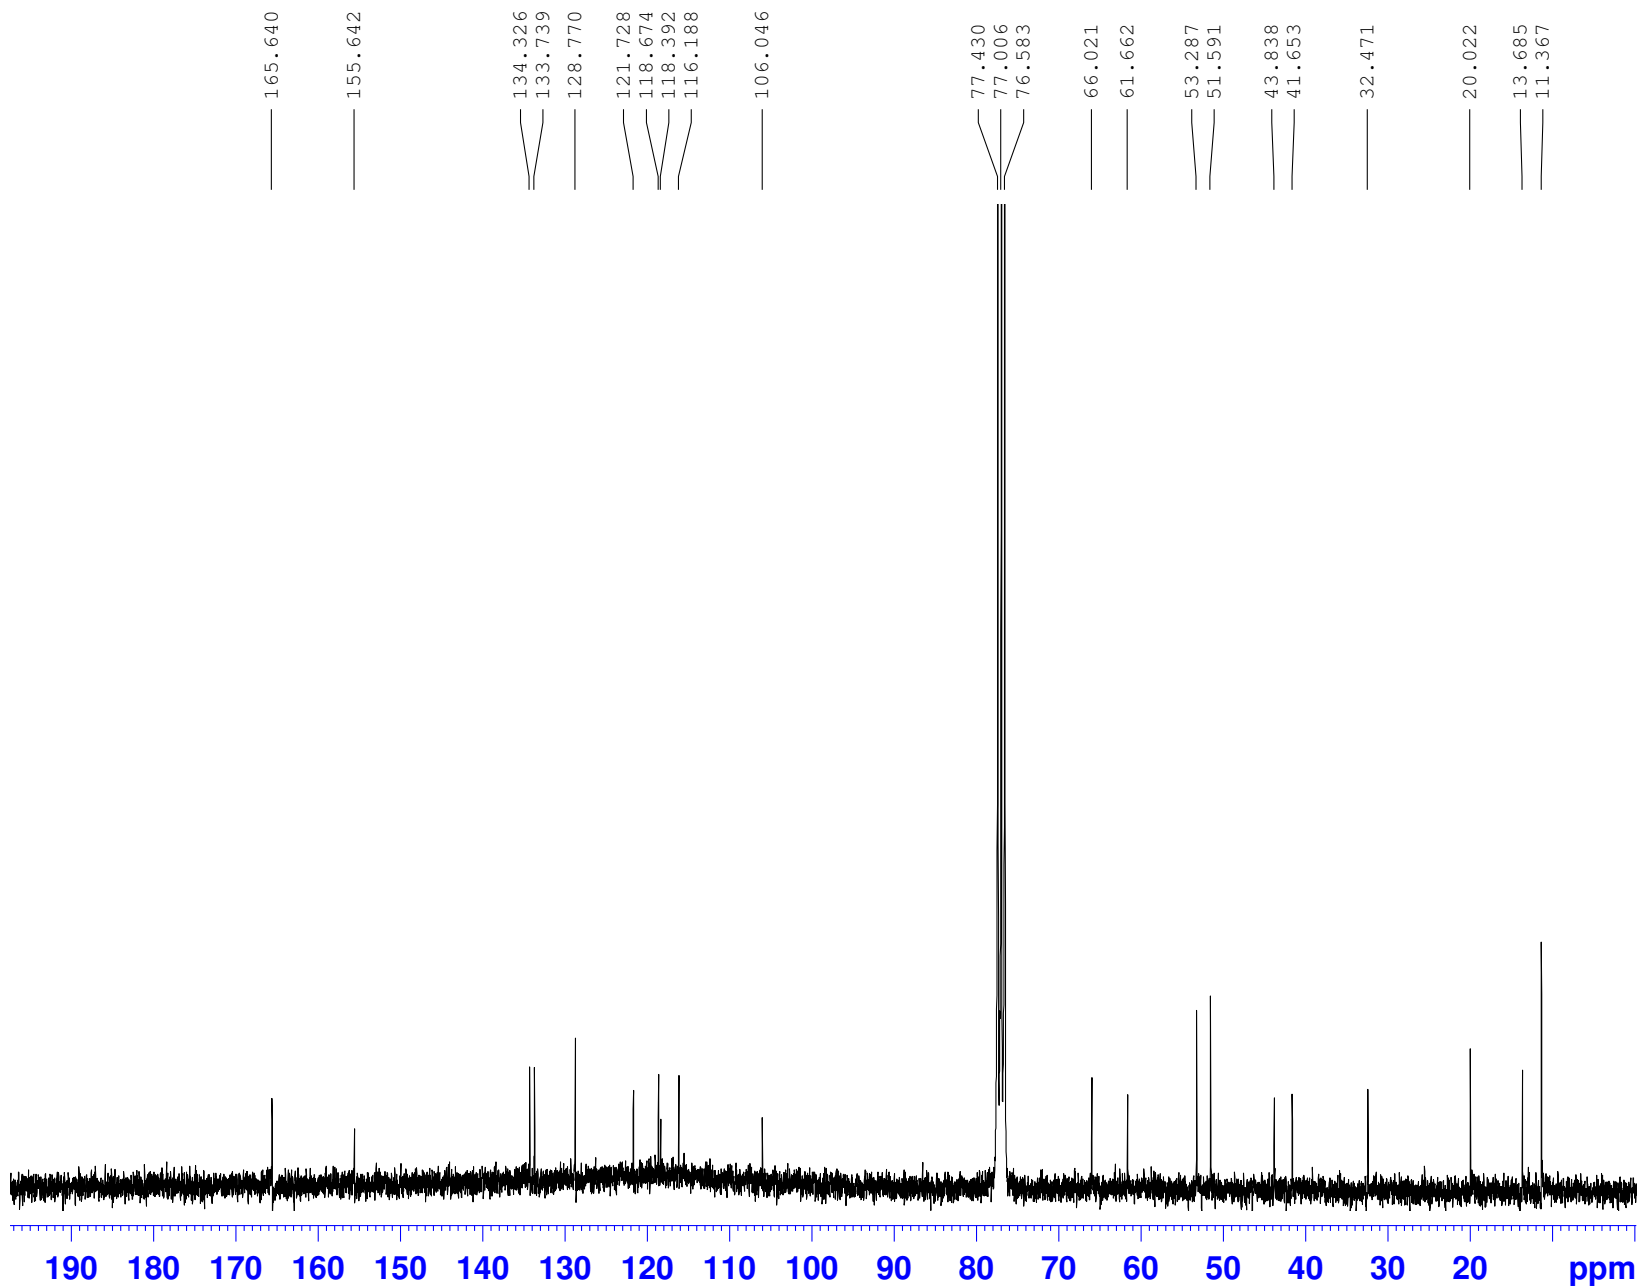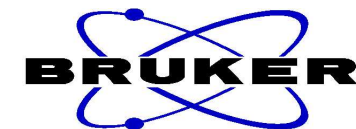

Current Data Parameters  
NAME Redzicka 1019  
EXPNO 2  
PROCNO 1

F2 - Acquisition Parameters  
Date\_ 20210721  
Time 21.12  
INSTRUM spect  
PROBHD 5 mm BBI 1H/D-  
PULPROG zgpg30  
TD 65536  
SOLVENT CDCl3  
NS 5120  
DS 2  
SWH 17985.611 Hz  
FIDRES 0.274439 Hz  
AQ 1.8219508 sec  
RG 18390.4  
DW 27.800 usec  
DE 20.00 usec  
TE 299.4 K  
D1 2.00000000 sec  
d11 0.03000000 sec  
DELTA 1.89999998 sec  
TD0 1

===== CHANNEL f1 =====  
NUC1 13C  
P1 11.90 usec  
PL1 -6.00 dB  
SFO1 75.4803248 MHz

===== CHANNEL f2 =====  
CPDPRG2 waltz16  
NUC2 1H  
PCPD2 100.00 usec  
PL2 2.00 dB  
PL12 21.66 dB  
PL13 23.00 dB  
SFO2 300.1512006 MHz

F2 - Processing parameters  
SI 32768  
SF 75.4727782 MHz  
WDW EM  
SSB 0  
LB 1.00 Hz  
GB 0  
PC 2.00

3f H

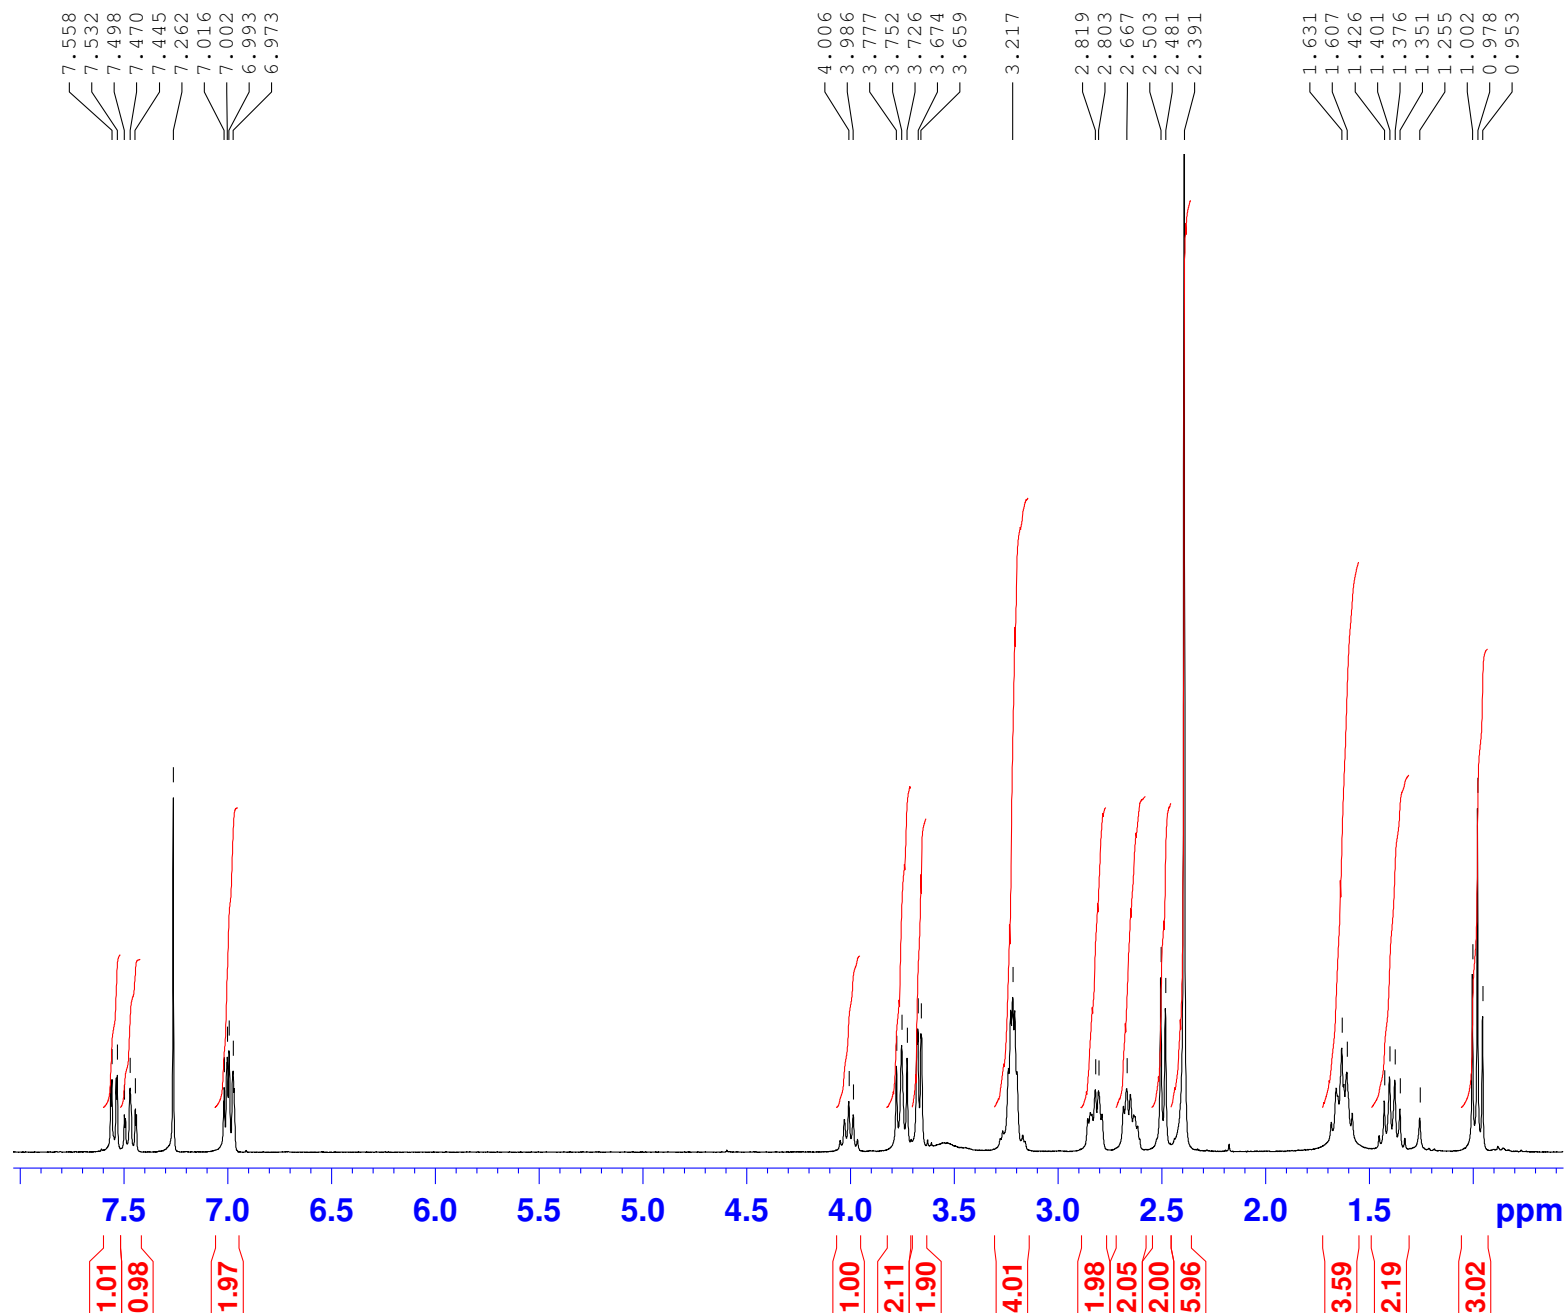

Current Data Parameters  
 NAME Redzicka 1019  
 EXPNO 1  
 PROCNO 1

F2 - Acquisition Parameters  
 Date\_ 20210721  
 Time 15.38  
 INSTRUM spect  
 PROBHD 5 mm BBI 1H/D-  
 PULPROG zg30  
 TD 65536  
 SOLVENT CDC13  
 NS 16  
 DS 0  
 SWH 6172.839 Hz  
 FIDRES 0.094190 Hz  
 AQ 5.3084660 sec  
 RG 406.4  
 DW 81.000 usec  
 DE 8.00 usec  
 TE 298.2 K  
 D1 1.00000000 sec  
 TD0 1

===== CHANNEL f1 =====  
 NUC1 1H  
 P1 10.40 usec  
 PL1 2.00 dB  
 SFO1 300.1518535 MHz

F2 - Processing parameters  
 SI 32768  
 SF 300.1500045 MHz  
 WDW EM  
 SSB 0  
 LB 0.30 Hz  
 GB 0  
 PC 20.00

3g C

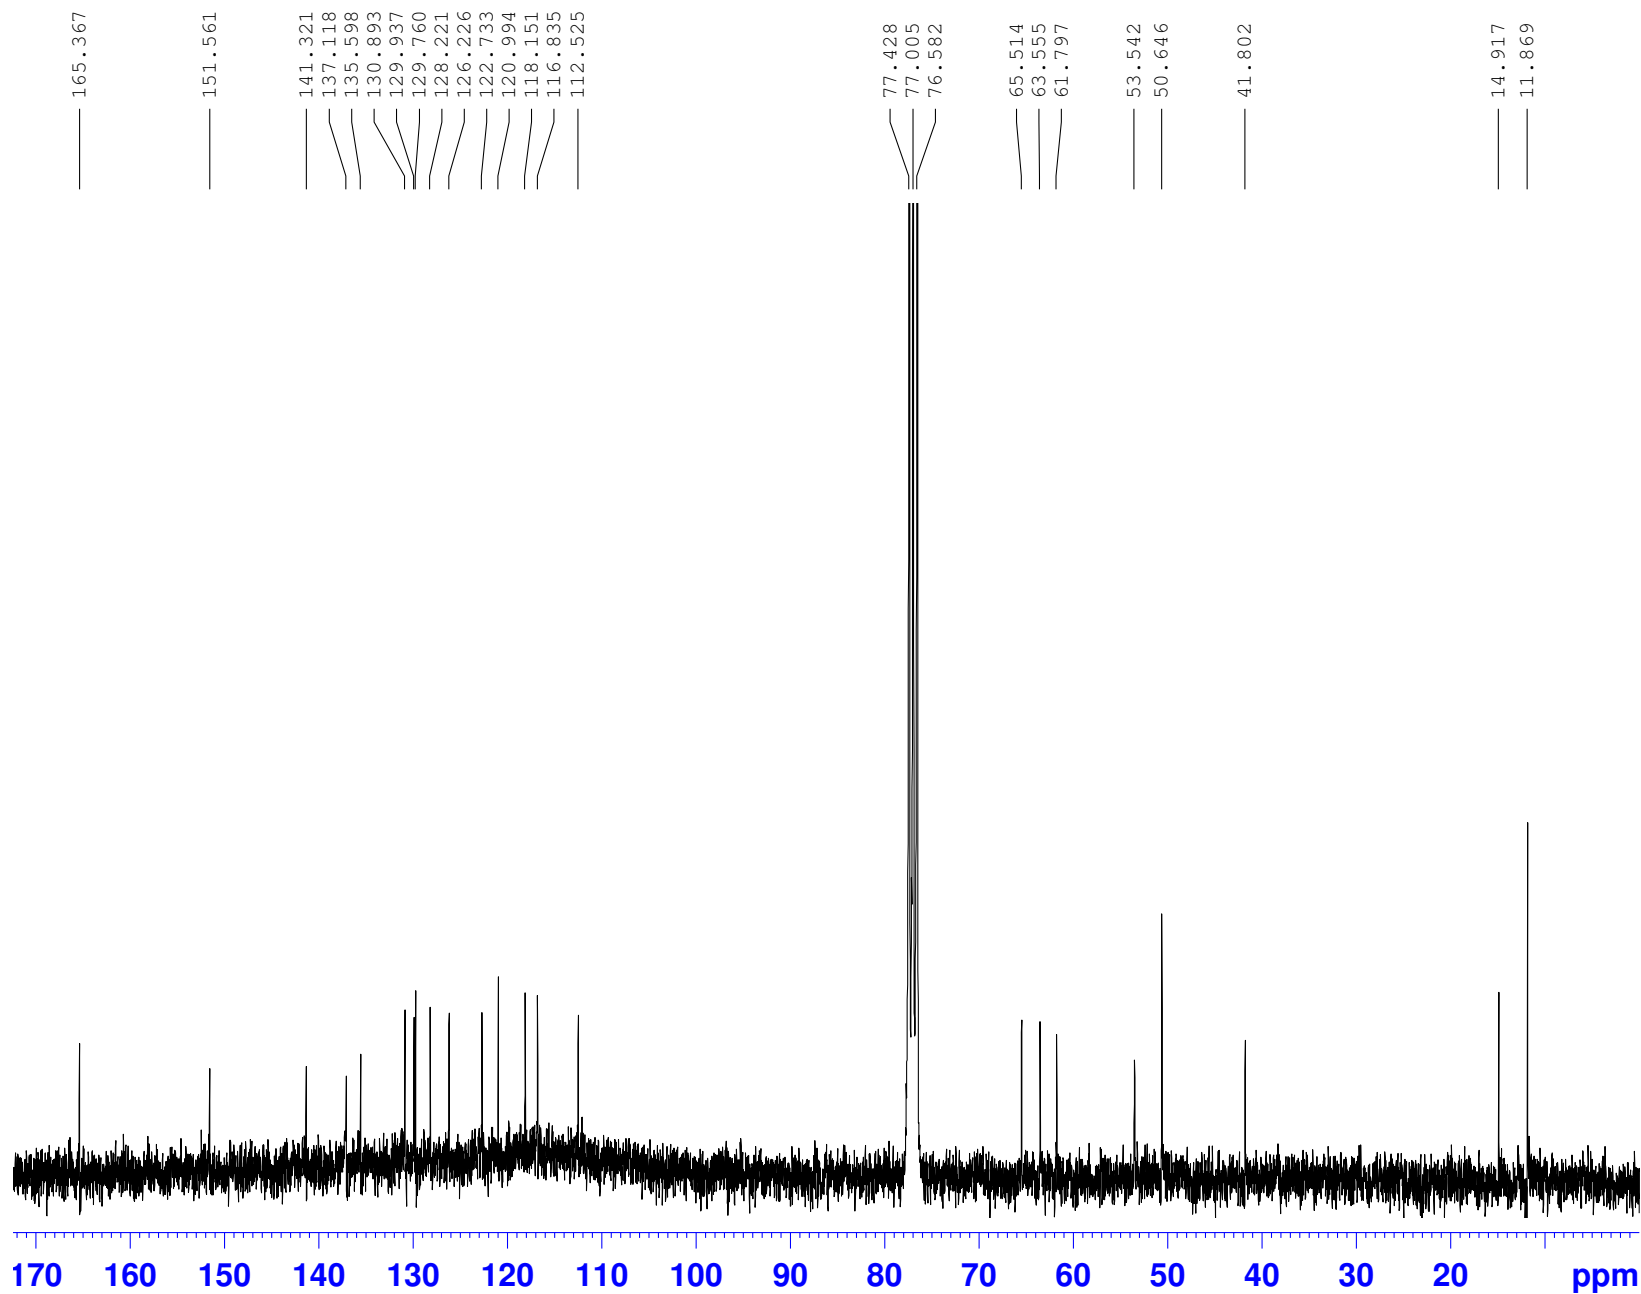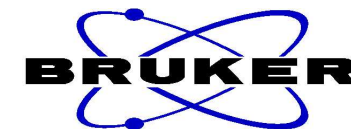

Current Data Parameters  
NAME Redzicka 1010  
EXPNO 2  
PROCNO 1

F2 - Acquisition Parameters  
Date\_ 20210630  
Time 22.16  
INSTRUM spect  
PROBHD 5 mm BBI 1H/D-  
PULPROG zgpg30  
TD 65536  
SOLVENT CDCl3  
NS 5120  
DS 2  
SWH 17985.611 Hz  
FIDRES 0.274439 Hz  
AQ 1.8219508 sec  
RG 14596.5  
DW 27.800 usec  
DE 20.00 usec  
TE 299.3 K  
D1 2.00000000 sec  
d11 0.03000000 sec  
DELTA 1.89999998 sec  
TD0 1

===== CHANNEL f1 =====  
NUC1 13C  
P1 11.90 usec  
PL1 -6.00 dB  
SFO1 75.4803248 MHz

===== CHANNEL f2 =====  
CPDPRG2 waltz16  
NUC2 1H  
PCPD2 100.00 usec  
PL2 2.00 dB  
PL12 21.66 dB  
PL13 23.00 dB  
SFO2 300.1512006 MHz

F2 - Processing parameters  
SI 32768  
SF 75.4727782 MHz  
WDW EM  
SSB 0  
LB 1.00 Hz  
GB 0  
PC 2.00

3g H

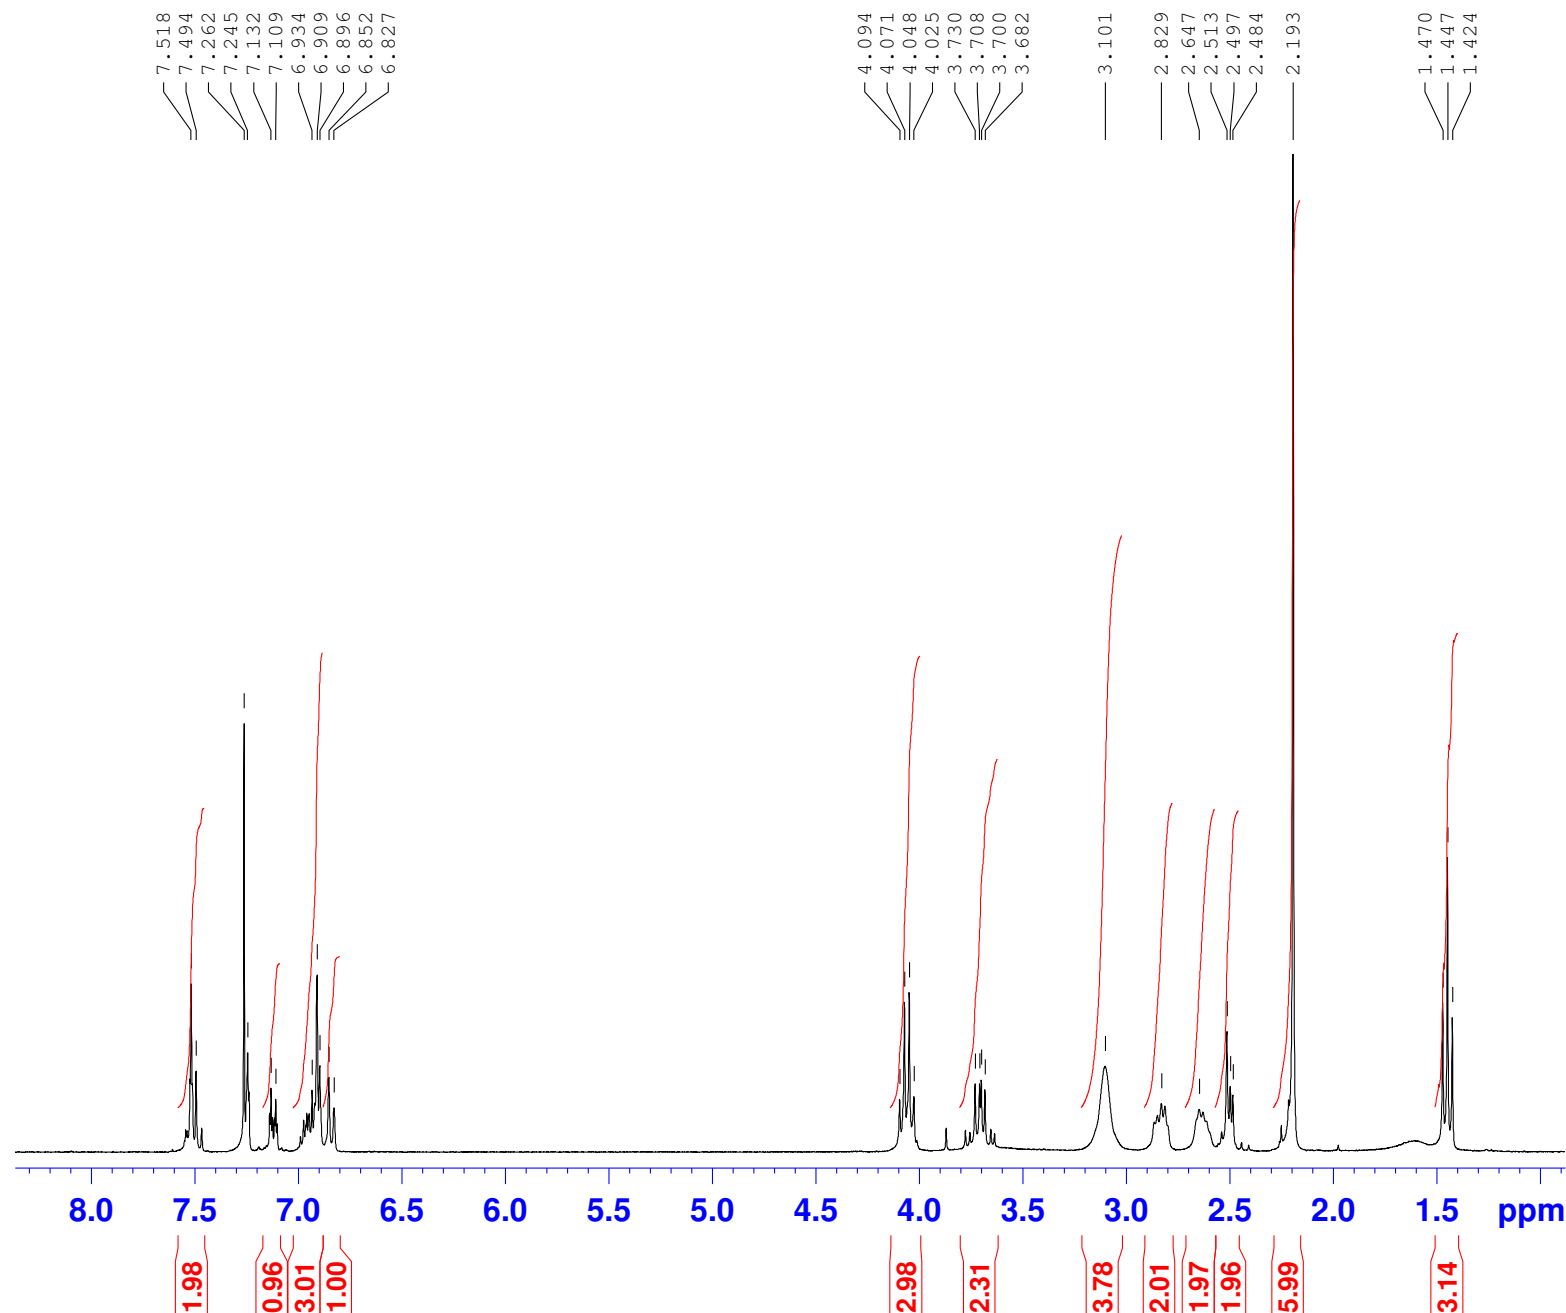

Current Data Parameters  
 NAME Redzicka 1010  
 EXPNO 1  
 PROCNO 1

F2 - Acquisition Parameters  
 Date\_ 20210630  
 Time 16.41  
 INSTRUM spect  
 PROBHD 5 mm BBI 1H/D-  
 PULPROG zg30  
 TD 65536  
 SOLVENT CDCl3  
 NS 16  
 DS 0  
 SWH 6172.839 Hz  
 FIDRES 0.094190 Hz  
 AQ 5.3084660 sec  
 RG 512  
 DW 81.000 usec  
 DE 8.00 usec  
 TE 297.9 K  
 D1 1.00000000 sec  
 TD0 1

===== CHANNEL f1 =====  
 NUC1 1H  
 P1 10.40 usec  
 PL1 2.00 dB  
 SFO1 300.1518535 MHz

F2 - Processing parameters  
 SI 32768  
 SF 300.1500045 MHz  
 WDW EM  
 SSB 0  
 LB 0.30 Hz  
 GB 0  
 PC 20.00

3h C

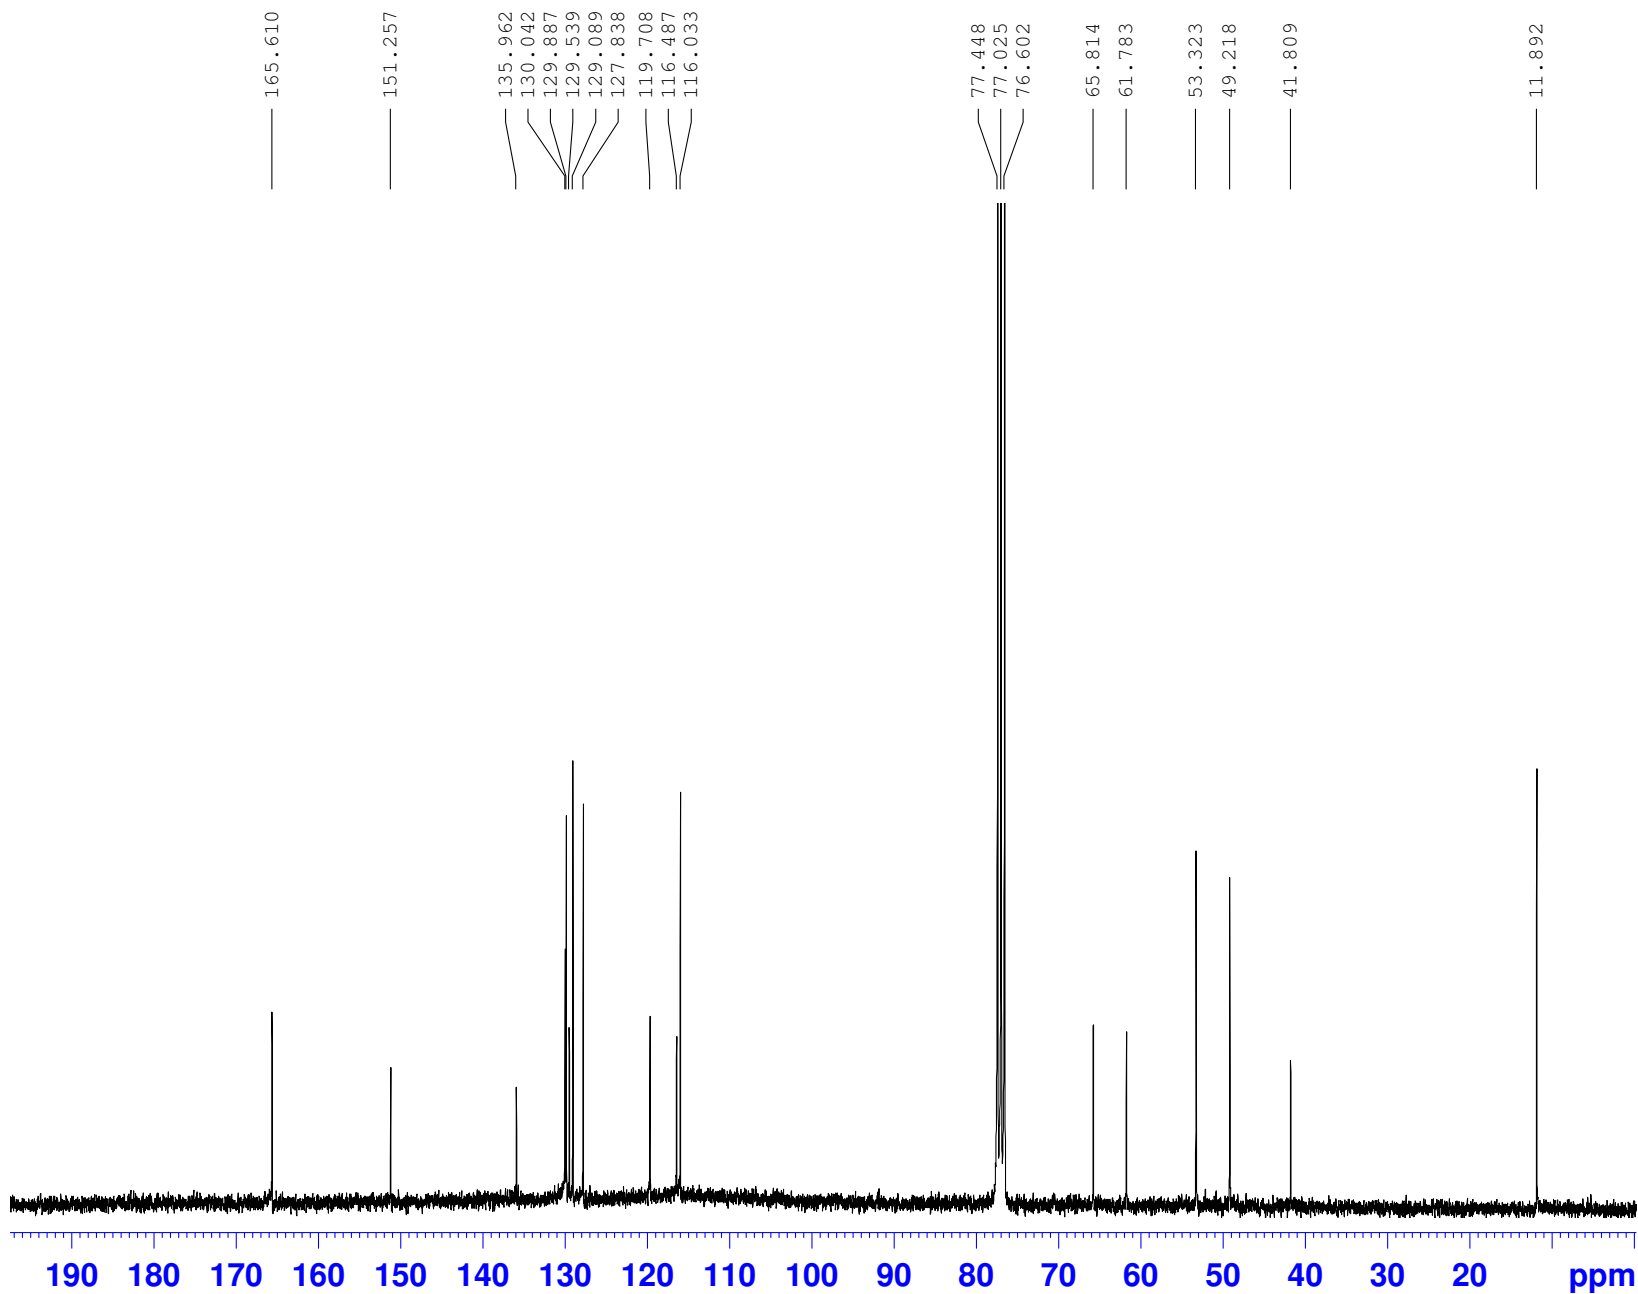

Current Data Parameters  
NAME Redzicka 1021  
EXPNO 2  
PROCNO 1

F2 - Acquisition Parameters  
Date\_ 20210722  
Time 22.46  
INSTRUM spect  
PROBHD 5 mm BBI 1H/D-  
PULPROG zgpg30  
TD 65536  
SOLVENT CDCl3  
NS 5120  
DS 2  
SWH 17985.611 Hz  
FIDRES 0.274439 Hz  
AQ 1.8219508 sec  
RG 14596.5  
DW 27.800 usec  
DE 20.00 usec  
TE 299.3 K  
D1 2.00000000 sec  
d11 0.03000000 sec  
DELTA 1.89999998 sec  
TD0 1

===== CHANNEL f1 =====  
NUC1 13C  
P1 11.90 usec  
PL1 -6.00 dB  
SFO1 75.4803248 MHz

===== CHANNEL f2 =====  
CPDPRG2 waltz16  
NUC2 1H  
PCPD2 100.00 usec  
PL2 2.00 dB  
PL12 21.66 dB  
PL13 23.00 dB  
SFO2 300.1512006 MHz

F2 - Processing parameters  
SI 32768  
SF 75.4727782 MHz  
WDW EM  
SSB 0  
LB 1.00 Hz  
GB 0  
PC 2.00

3h H

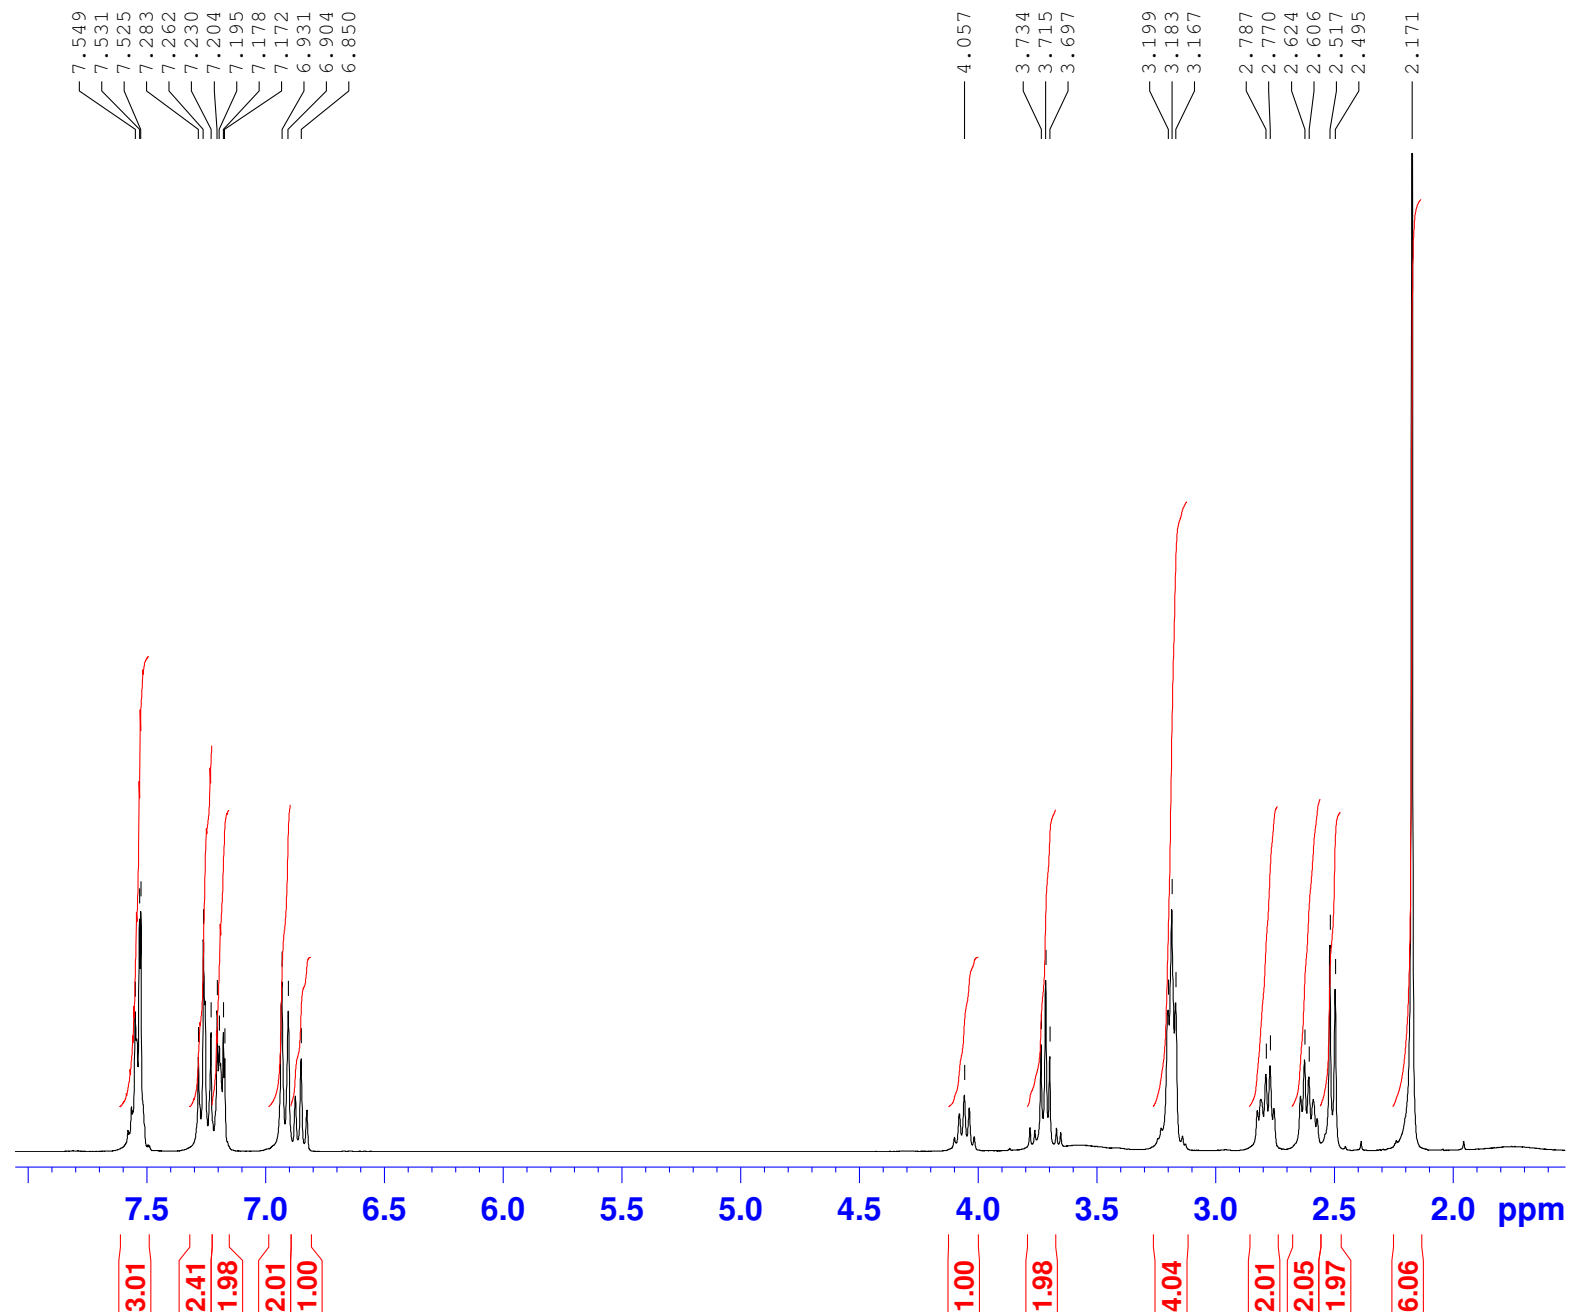

Current Data Parameters  
NAME Redzicka 1021  
EXPNO 1  
PROCNO 1

F2 - Acquisition Parameters  
Date\_ 20210722  
Time 17.11  
INSTRUM spect  
PROBHD 5 mm BBI 1H/D-  
PULPROG zg30  
TD 65536  
SOLVENT CDC13  
NS 16  
DS 0  
SWH 6172.839 Hz  
FIDRES 0.094190 Hz  
AQ 5.3084660 sec  
RG 181  
DW 81.000 usec  
DE 8.00 usec  
TE 298.3 K  
D1 1.00000000 sec  
TD0 1

===== CHANNEL f1 =====  
NUC1 1H  
P1 10.40 usec  
PL1 2.00 dB  
SFO1 300.1518535 MHz

F2 - Processing parameters  
SI 32768  
SF 300.1500045 MHz  
WDW EM  
SSB 0  
LB 0.30 Hz  
GB 0  
PC 20.00

3i C

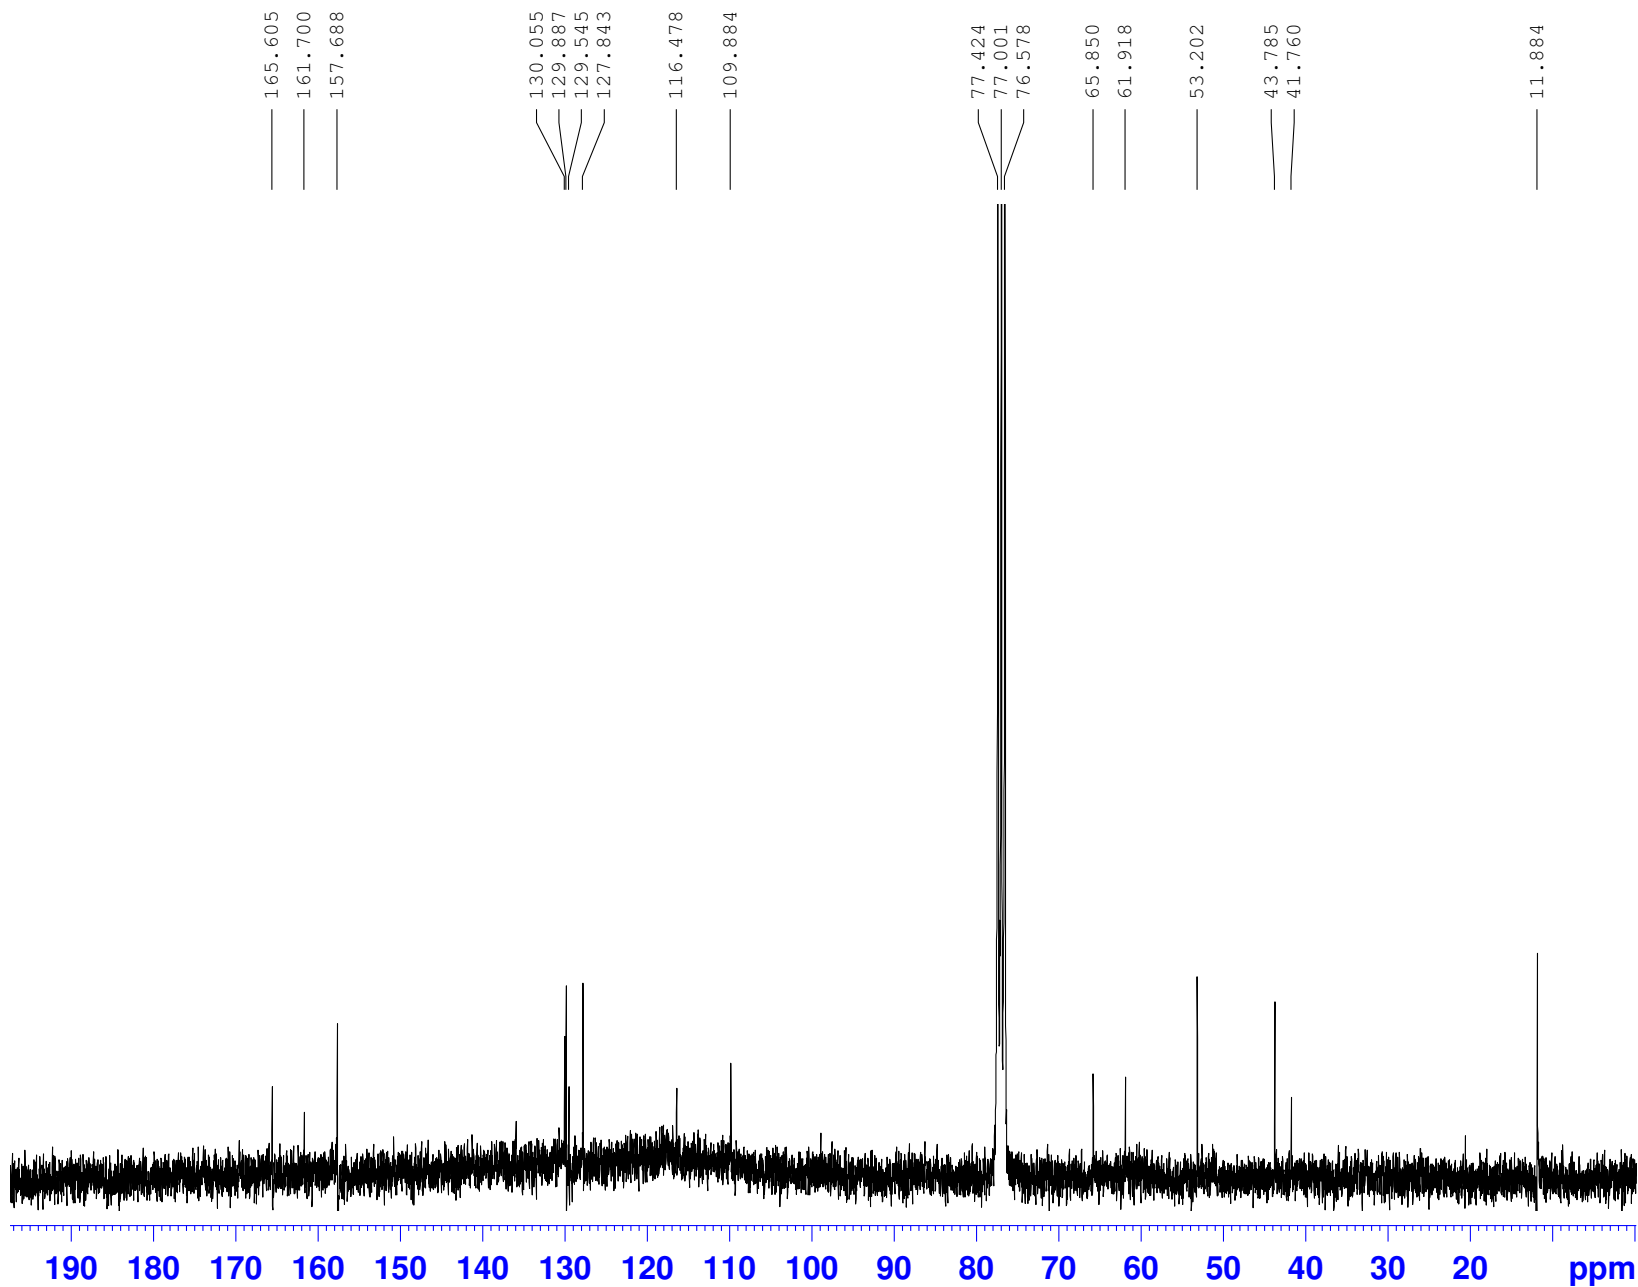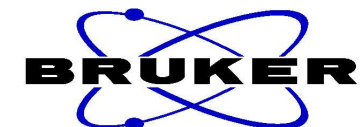

Current Data Parameters  
NAME Redzicka 1011  
EXPNO 2  
PROCNO 1

F2 - Acquisition Parameters  
Date\_ 20210701  
Time 14.45  
INSTRUM spect  
PROBHD 5 mm BBI 1H/D-  
PULPROG zgpg30  
TD 65536  
SOLVENT CDCl3  
NS 5120  
DS 2  
SWH 17985.611 Hz  
FIDRES 0.274439 Hz  
AQ 1.8219508 sec  
RG 18390.4  
DW 27.800 usec  
DE 20.00 usec  
TE 299.3 K  
D1 2.00000000 sec  
d11 0.03000000 sec  
DELTA 1.89999998 sec  
TD0 1

===== CHANNEL f1 =====  
NUC1 13C  
P1 11.90 usec  
PL1 -6.00 dB  
SFO1 75.4803248 MHz

===== CHANNEL f2 =====  
CPDPRG2 waltz16  
NUC2 1H  
PCPD2 100.00 usec  
PL2 2.00 dB  
PL12 21.66 dB  
PL13 23.00 dB  
SFO2 300.1512006 MHz

F2 - Processing parameters  
SI 32768  
SF 75.4727782 MHz  
WDW EM  
SSB 0  
LB 1.00 Hz  
GB 0  
PC 2.00

3i H

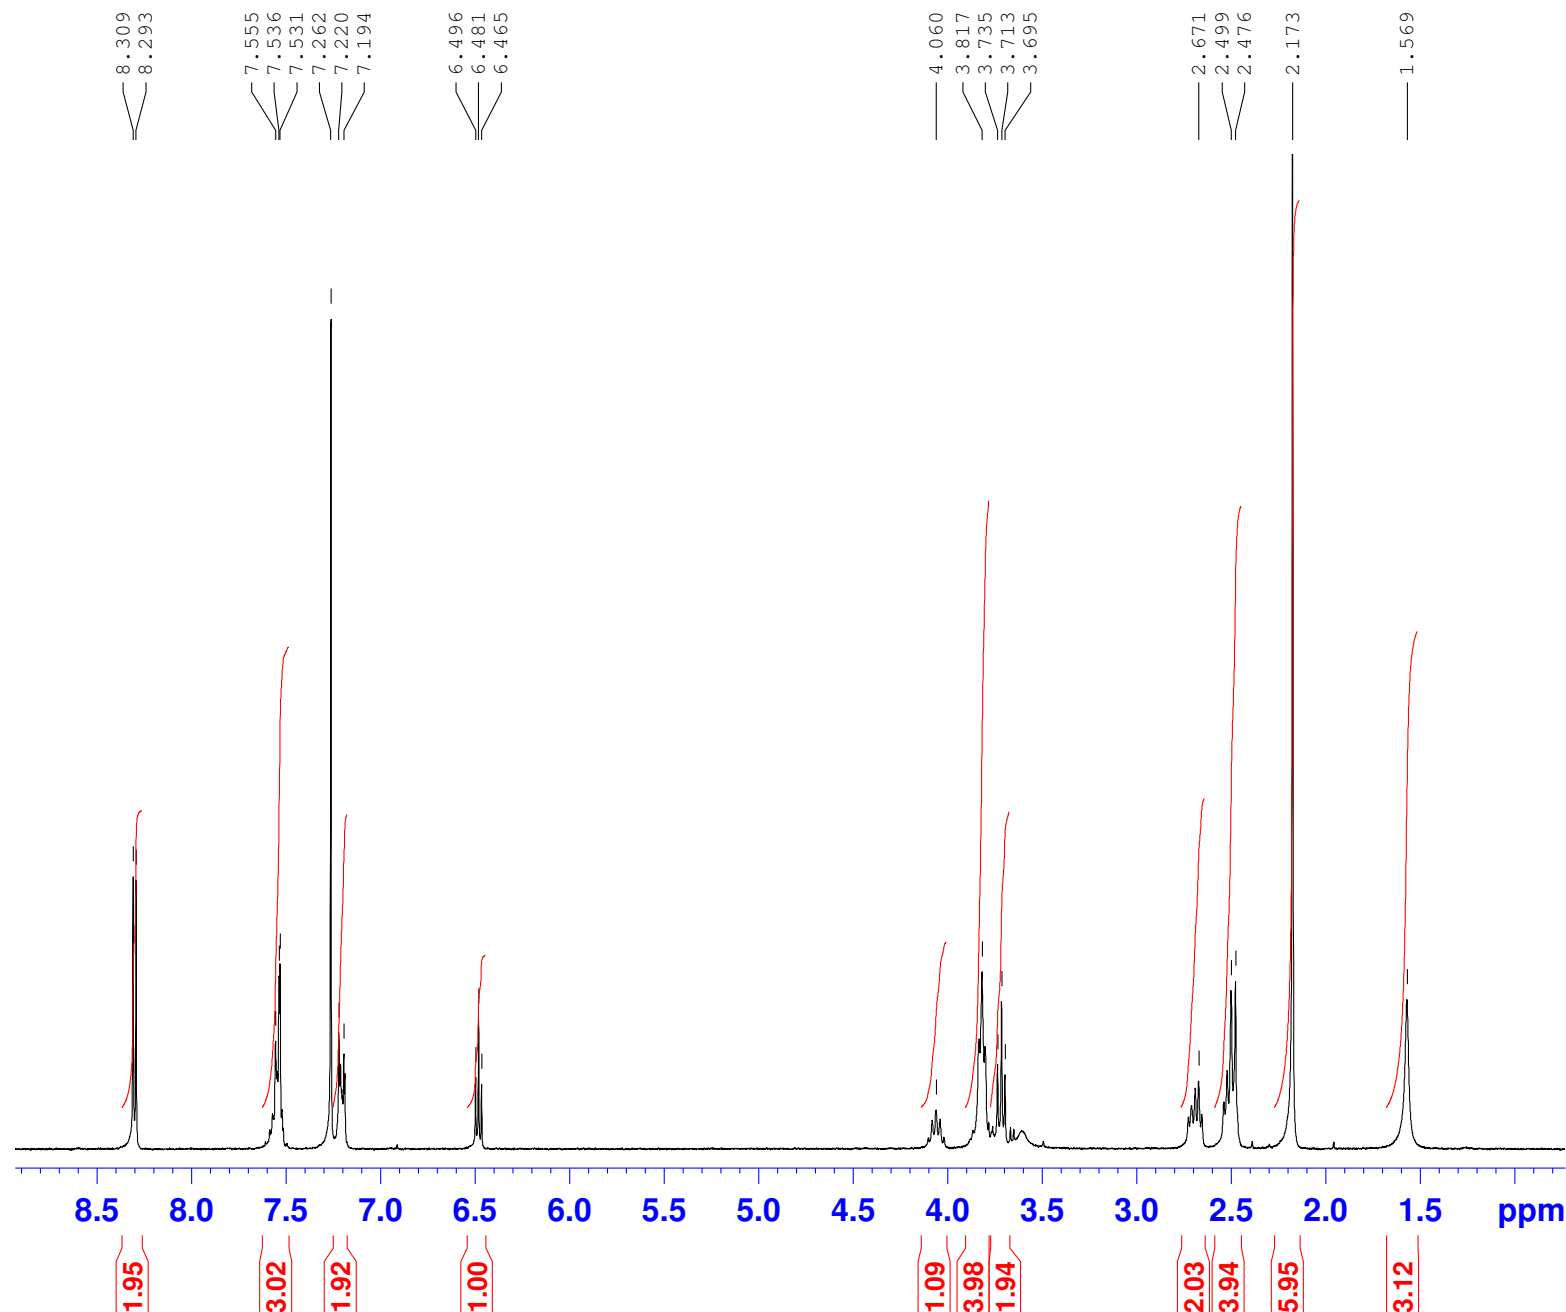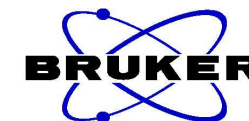

Current Data Parameters  
NAME Redzicka 1011  
EXPNO 1  
PROCNO 1

F2 - Acquisition Parameters  
Date\_ 20210701  
Time 9.11  
INSTRUM spect  
PROBHD 5 mm BBI 1H/D-  
PULPROG zg30  
TD 65536  
SOLVENT CDCl3  
NS 16  
DS 0  
SWH 6172.839 Hz  
FIDRES 0.094190 Hz  
AQ 5.3084660 sec  
RG 812.7  
DW 81.000 usec  
DE 8.00 usec  
TE 298.4 K  
D1 1.00000000 sec  
TD0 1

===== CHANNEL f1 =====  
NUC1 1H  
P1 10.40 usec  
PL1 2.00 dB  
SFO1 300.1518535 MHz

F2 - Processing parameters  
SI 32768  
SF 300.1500045 MHz  
WDW EM  
SSB 0  
LB 0.30 Hz  
GB 0  
PC 20.00



3j c

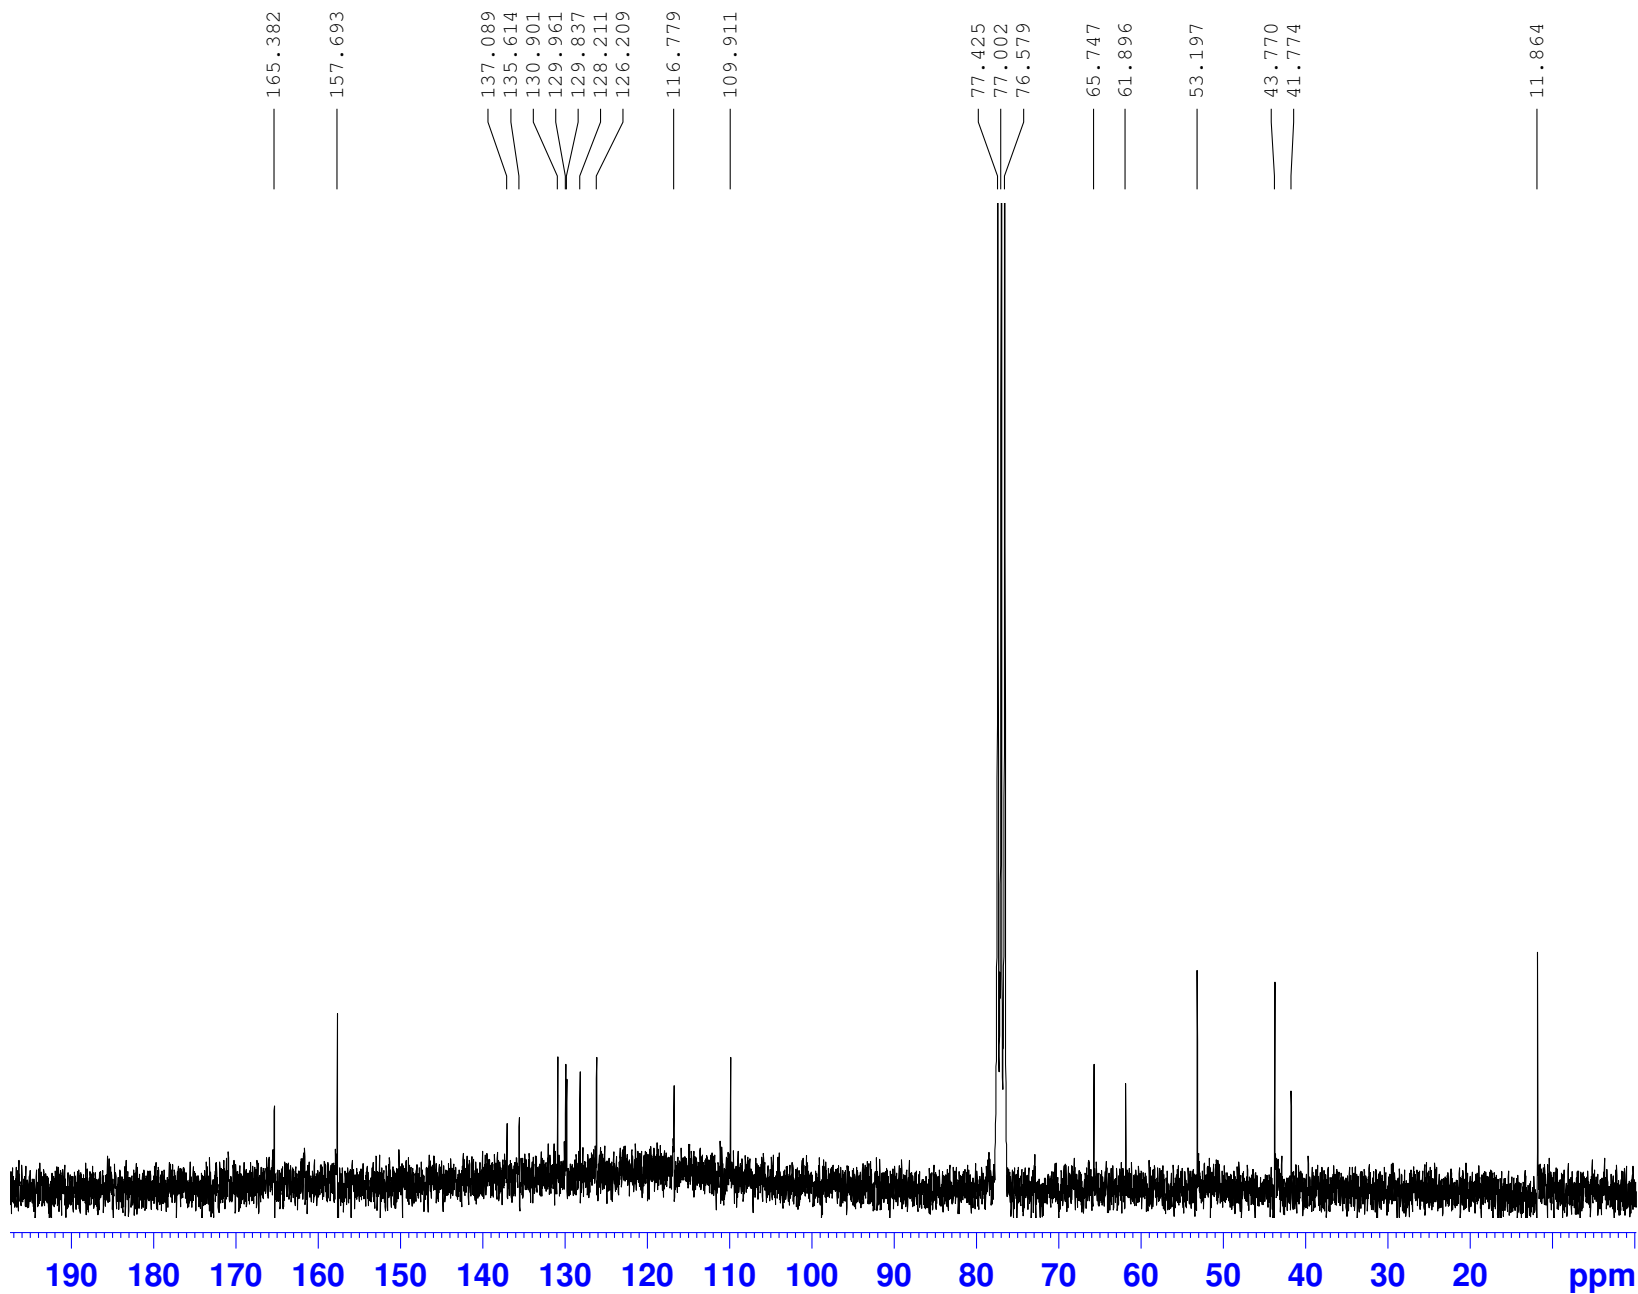

Current Data Parameters  
NAME Redzicka 1013  
EXPNO 2  
PROCNO 1

F2 - Acquisition Parameters  
Date\_ 20210702  
Time 14.41  
INSTRUM spect  
PROBHD 5 mm BBI 1H/D-  
PULPROG zgpg30  
TD 65536  
SOLVENT CDCl3  
NS 5120  
DS 2  
SWH 17985.611 Hz  
FIDRES 0.274439 Hz  
AQ 1.8219508 sec  
RG 14596.5  
DW 27.800 usec  
DE 20.00 usec  
TE 299.4 K  
D1 2.00000000 sec  
d11 0.03000000 sec  
DELTA 1.89999998 sec  
TD0 1

===== CHANNEL f1 =====  
NUC1 13C  
P1 11.90 usec  
PL1 -6.00 dB  
SFO1 75.4803248 MHz

===== CHANNEL f2 =====  
CPDPRG2 waltz16  
NUC2 1H  
PCPD2 100.00 usec  
PL2 2.00 dB  
PL12 21.66 dB  
PL13 23.00 dB  
SFO2 300.1512006 MHz

F2 - Processing parameters  
SI 32768  
SF 75.4727782 MHz  
WDW EM  
SSB 0  
LB 1.00 Hz  
GB 0  
PC 2.00

3j H

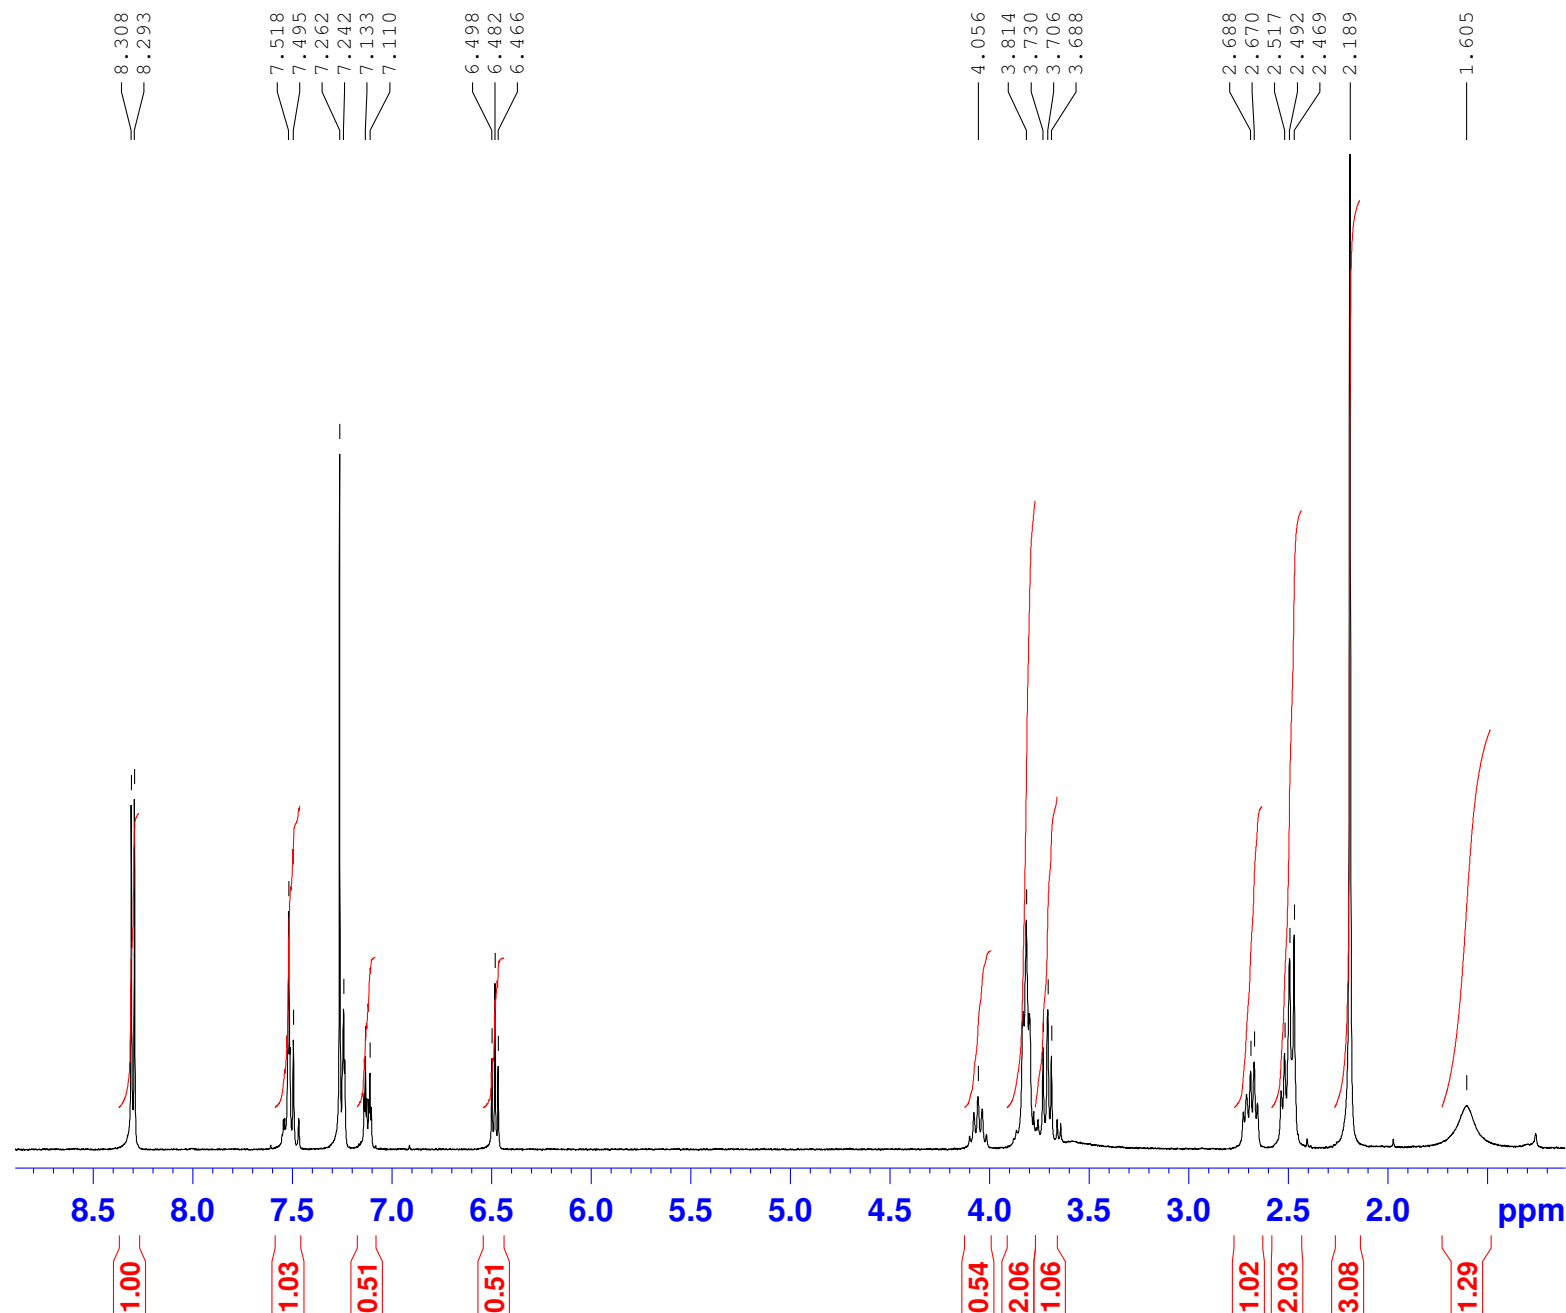

Current Data Parameters  
 NAME Redzicka 1013  
 EXPNO 1  
 PROCNO 1

F2 - Acquisition Parameters  
 Date\_ 20210702  
 Time 9.07  
 INSTRUM spect  
 PROBHD 5 mm BBI 1H/D-  
 PULPROG zg30  
 TD 65536  
 SOLVENT CDCl3  
 NS 16  
 DS 0  
 SWH 6172.839 Hz  
 FIDRES 0.094190 Hz  
 AQ 5.3084660 sec  
 RG 645.1  
 DW 81.000 usec  
 DE 8.00 usec  
 TE 298.2 K  
 D1 1.00000000 sec  
 TD0 1

===== CHANNEL f1 =====  
 NUC1 1H  
 P1 10.40 usec  
 PL1 2.00 dB  
 SFO1 300.1518535 MHz

F2 - Processing parameters  
 SI 32768  
 SF 300.1500045 MHz  
 WDW EM  
 SSB 0  
 LB 0.30 Hz  
 GB 0  
 PC 20.00

3k C

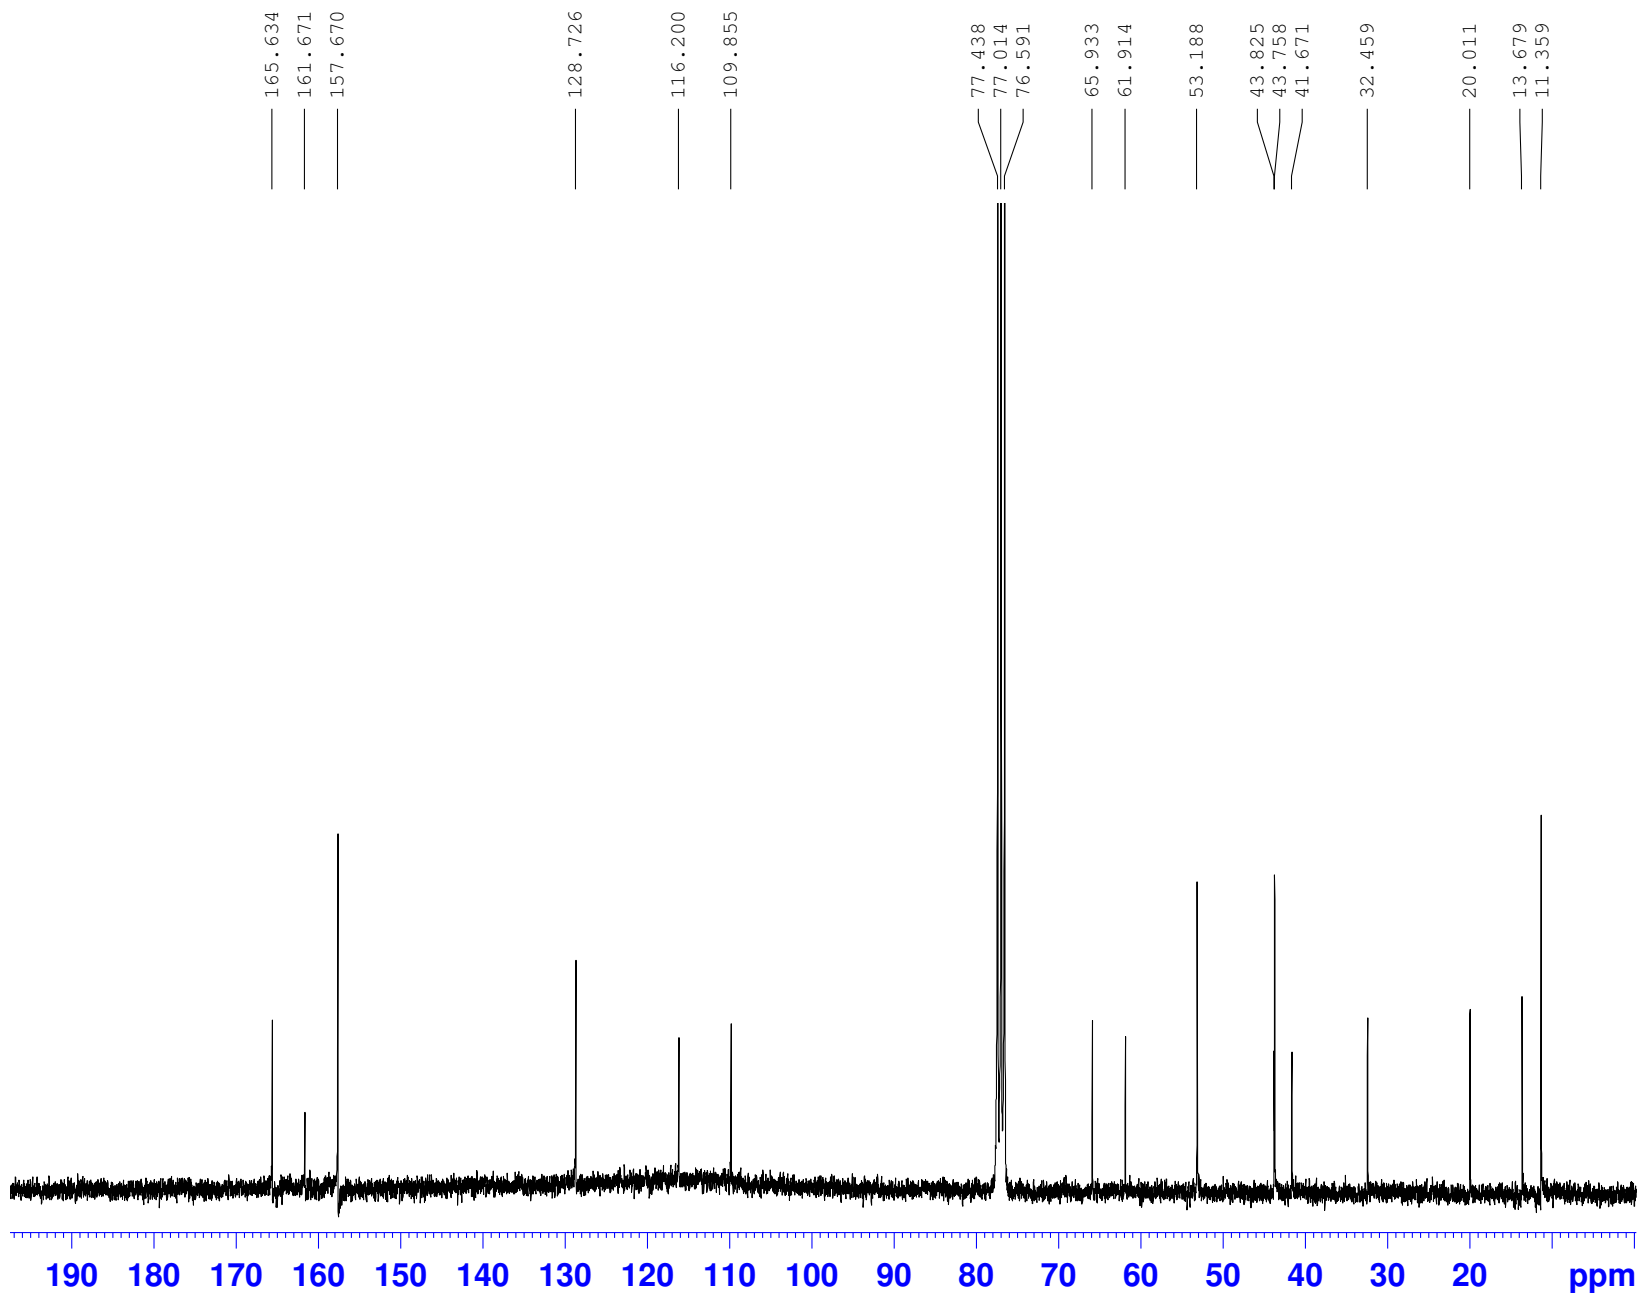

Current Data Parameters  
NAME Redzicka 1014  
EXPNO 2  
PROCNO 1

F2 - Acquisition Parameters  
Date\_ 20210719  
Time 15.15  
INSTRUM spect  
PROBHD 5 mm BBI 1H/D-  
PULPROG zgpg30  
TD 65536  
SOLVENT CDCl3  
NS 5120  
DS 2  
SWH 17985.611 Hz  
FIDRES 0.274439 Hz  
AQ 1.8219508 sec  
RG 16384  
DW 27.800 usec  
DE 20.00 usec  
TE 299.3 K  
D1 2.00000000 sec  
d11 0.03000000 sec  
DELTA 1.89999998 sec  
TD0 1

===== CHANNEL f1 =====  
NUC1 13C  
P1 11.90 usec  
PL1 -6.00 dB  
SFO1 75.4803248 MHz

===== CHANNEL f2 =====  
CPDPRG2 waltz16  
NUC2 1H  
PCPD2 100.00 usec  
PL2 2.00 dB  
PL12 21.66 dB  
PL13 23.00 dB  
SFO2 300.1512006 MHz

F2 - Processing parameters  
SI 32768  
SF 75.4727782 MHz  
WDW EM  
SSB 0  
LB 1.00 Hz  
GB 0  
PC 2.00

3k H

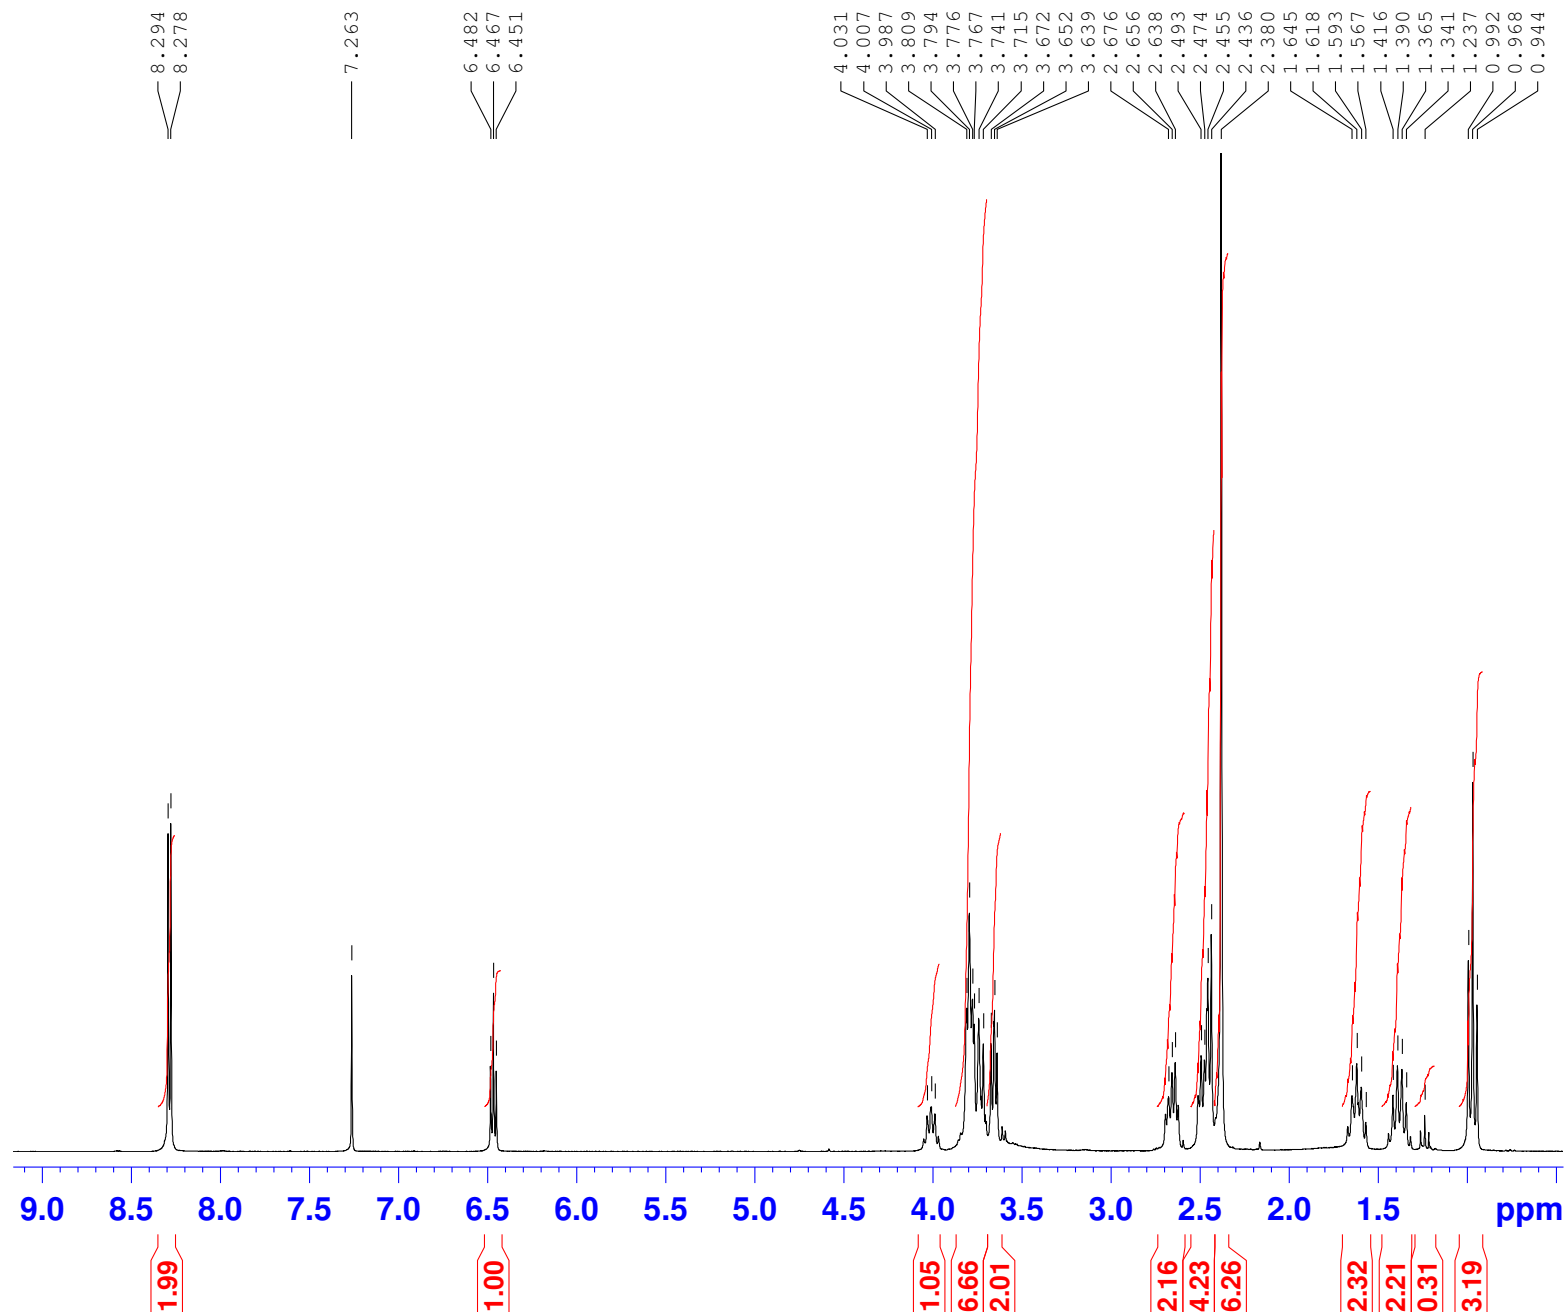

Current Data Parameters  
 NAME Redzicka 1014  
 EXPNO 1  
 PROCNO 1

F2 - Acquisition Parameters  
 Date\_ 20210719  
 Time\_ 9.36  
 INSTRUM spect  
 PROBHD 5 mm BBI 1H/D-  
 PULPROG zg30  
 TD 65536  
 SOLVENT CDC13  
 NS 16  
 DS 0  
 SWH 6172.839 Hz  
 FIDRES 0.094190 Hz  
 AQ 5.3084660 sec  
 RG 203.2  
 DW 81.000 usec  
 DE 8.00 usec  
 TE 298.1 K  
 D1 1.00000000 sec  
 TD0 1

===== CHANNEL f1 =====  
 NUC1 1H  
 P1 10.40 usec  
 PL1 2.00 dB  
 SFO1 300.1518535 MHz

F2 - Processing parameters  
 SI 32768  
 SF 300.1500045 MHz  
 WDW EM  
 SSB 0  
 LB 0.30 Hz  
 GB 0  
 PC 20.00

31 C

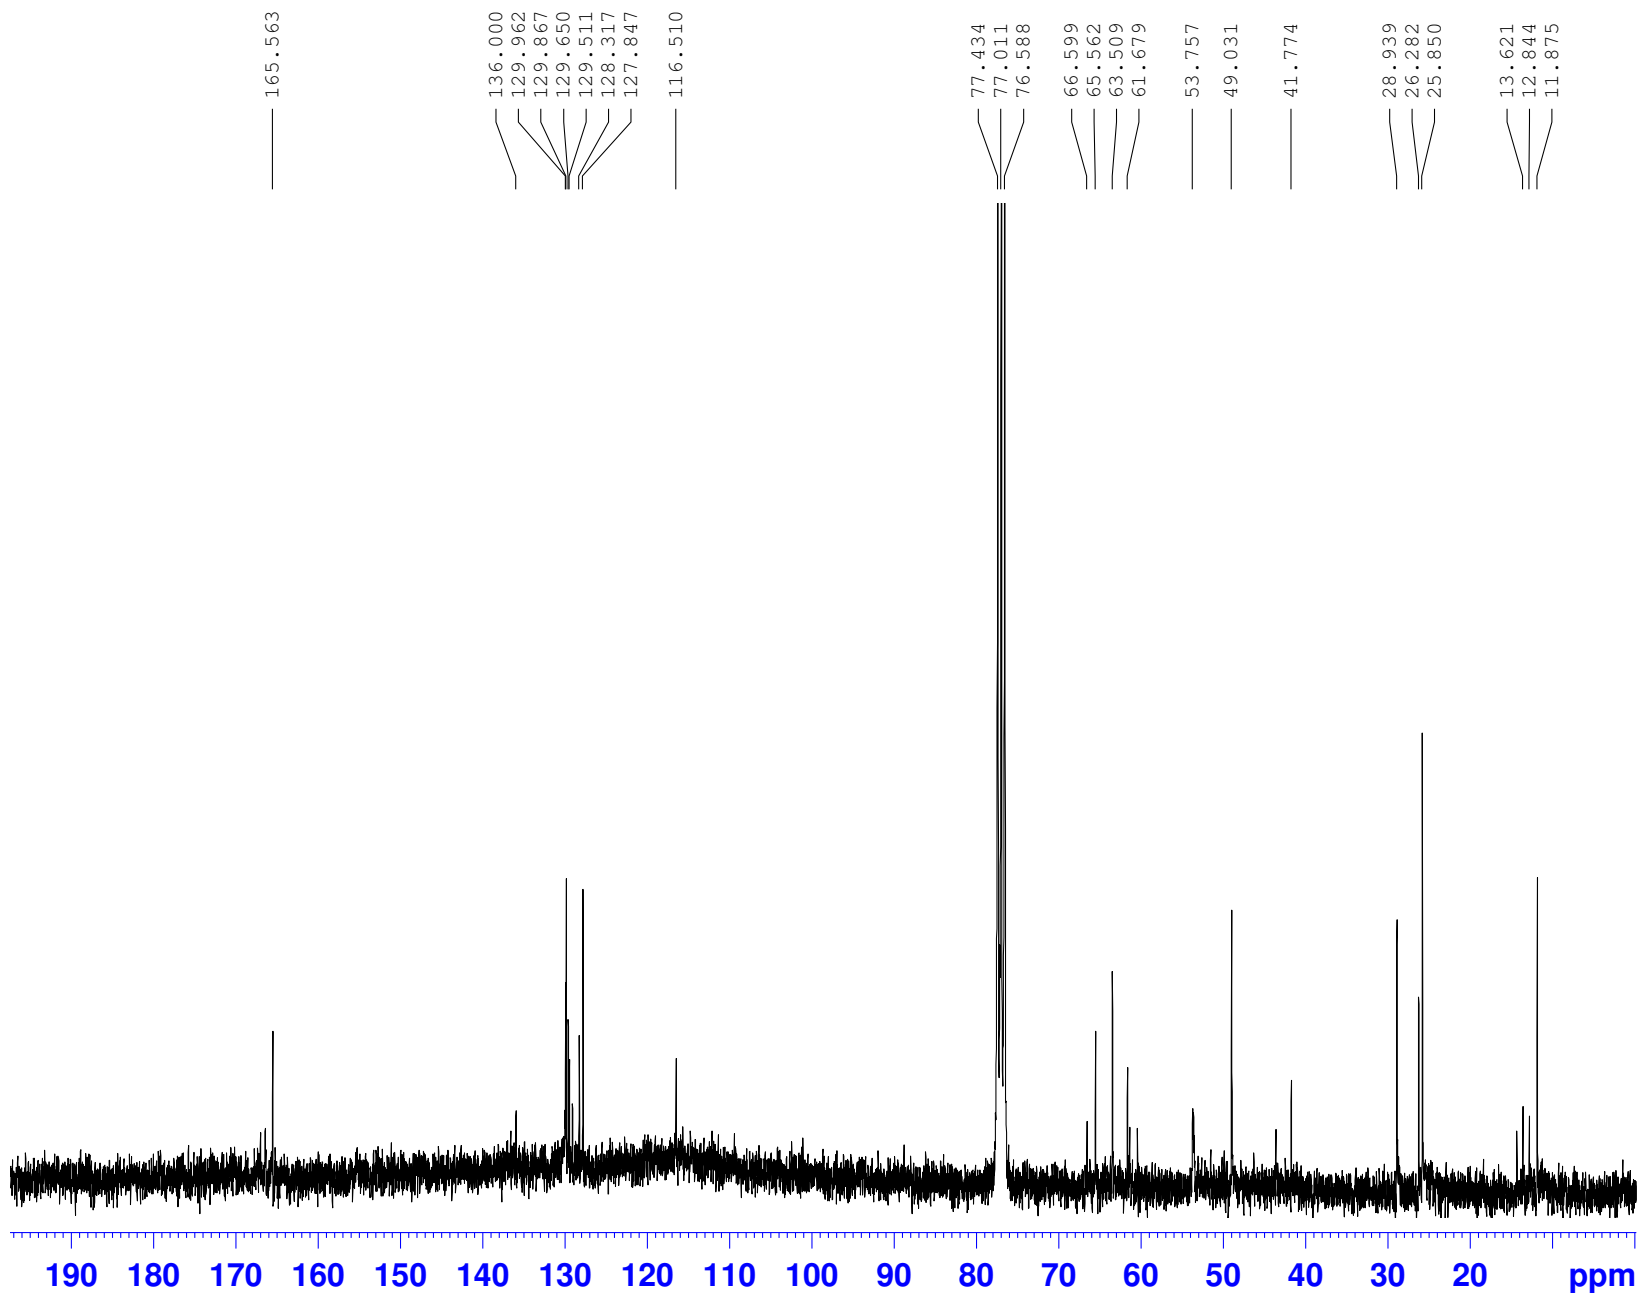

Current Data Parameters  
NAME Redzicka 1012  
EXPNO 2  
PROCNO 1

F2 - Acquisition Parameters  
Date\_ 20210701  
Time 20.42  
INSTRUM spect  
PROBHD 5 mm BBI 1H/D-  
PULPROG zgpg30  
TD 65536  
SOLVENT CDCl3  
NS 5120  
DS 2  
SWH 17985.611 Hz  
FIDRES 0.274439 Hz  
AQ 1.8219508 sec  
RG 29193  
DW 27.800 usec  
DE 20.00 usec  
TE 299.3 K  
D1 2.00000000 sec  
d11 0.03000000 sec  
DELTA 1.89999998 sec  
TD0 1

===== CHANNEL f1 =====  
NUC1 13C  
P1 11.90 usec  
PL1 -6.00 dB  
SFO1 75.4803248 MHz

===== CHANNEL f2 =====  
CPDPRG2 waltz16  
NUC2 1H  
PCPD2 100.00 usec  
PL2 2.00 dB  
PL12 21.66 dB  
PL13 23.00 dB  
SFO2 300.1512006 MHz

F2 - Processing parameters  
SI 32768  
SF 75.4727782 MHz  
WDW EM  
SSB 0  
LB 1.00 Hz  
GB 0  
PC 2.00

31 H

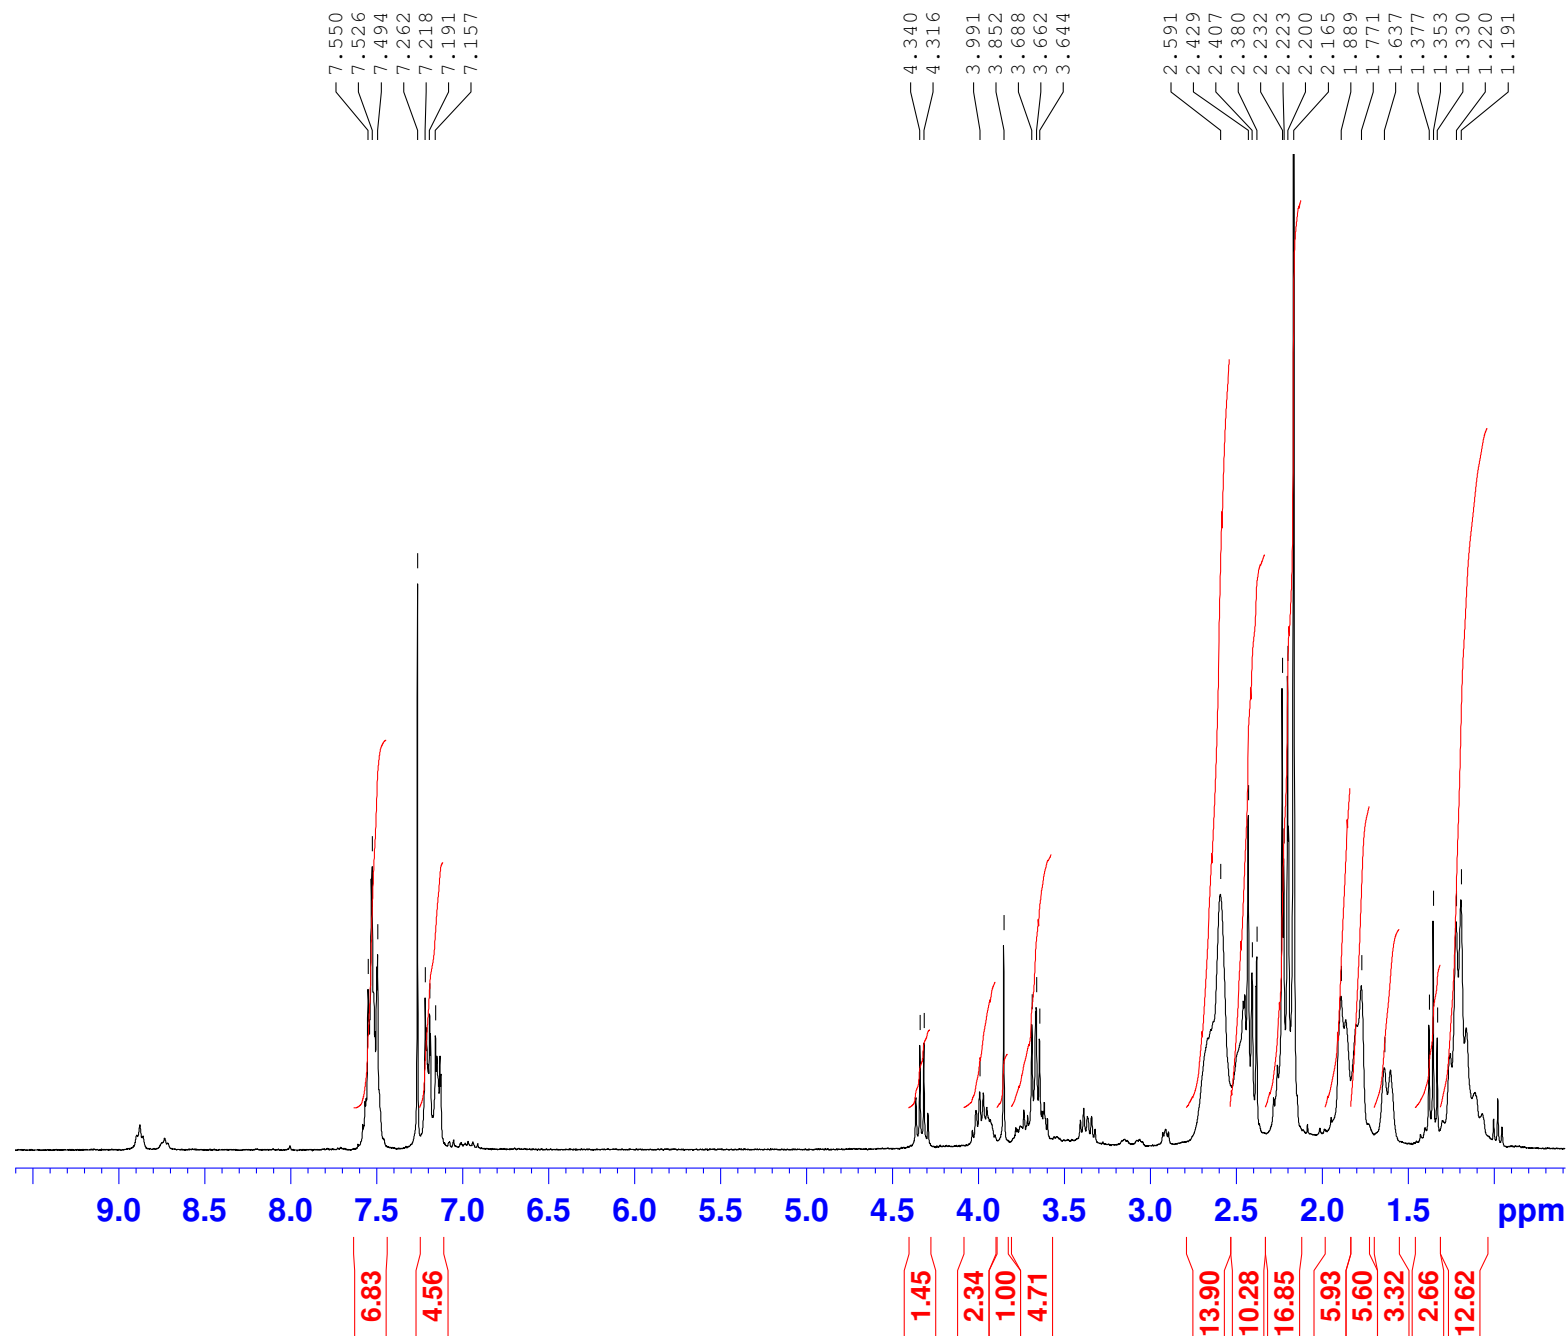

Current Data Parameters  
 NAME Redzicka 1012  
 EXPNO 1  
 PROCNO 1

F2 - Acquisition Parameters  
 Date\_ 20210701  
 Time 15.07  
 INSTRUM spect  
 PROBHD 5 mm BBI 1H/D-  
 PULPROG zg30  
 TD 65536  
 SOLVENT CDCl3  
 NS 16  
 DS 0  
 SWH 6172.839 Hz  
 FIDRES 0.094190 Hz  
 AQ 5.3084660 sec  
 RG 256  
 DW 81.000 usec  
 DE 8.00 usec  
 TE 298.1 K  
 D1 1.00000000 sec  
 TD0 1

===== CHANNEL f1 =====  
 NUC1 1H  
 P1 10.40 usec  
 PL1 2.00 dB  
 SFO1 300.1518535 MHz

F2 - Processing parameters  
 SI 32768  
 SF 300.1500045 MHz  
 WDW EM  
 SSB 0  
 LB 0.30 Hz  
 GB 0  
 PC 20.00

3m C

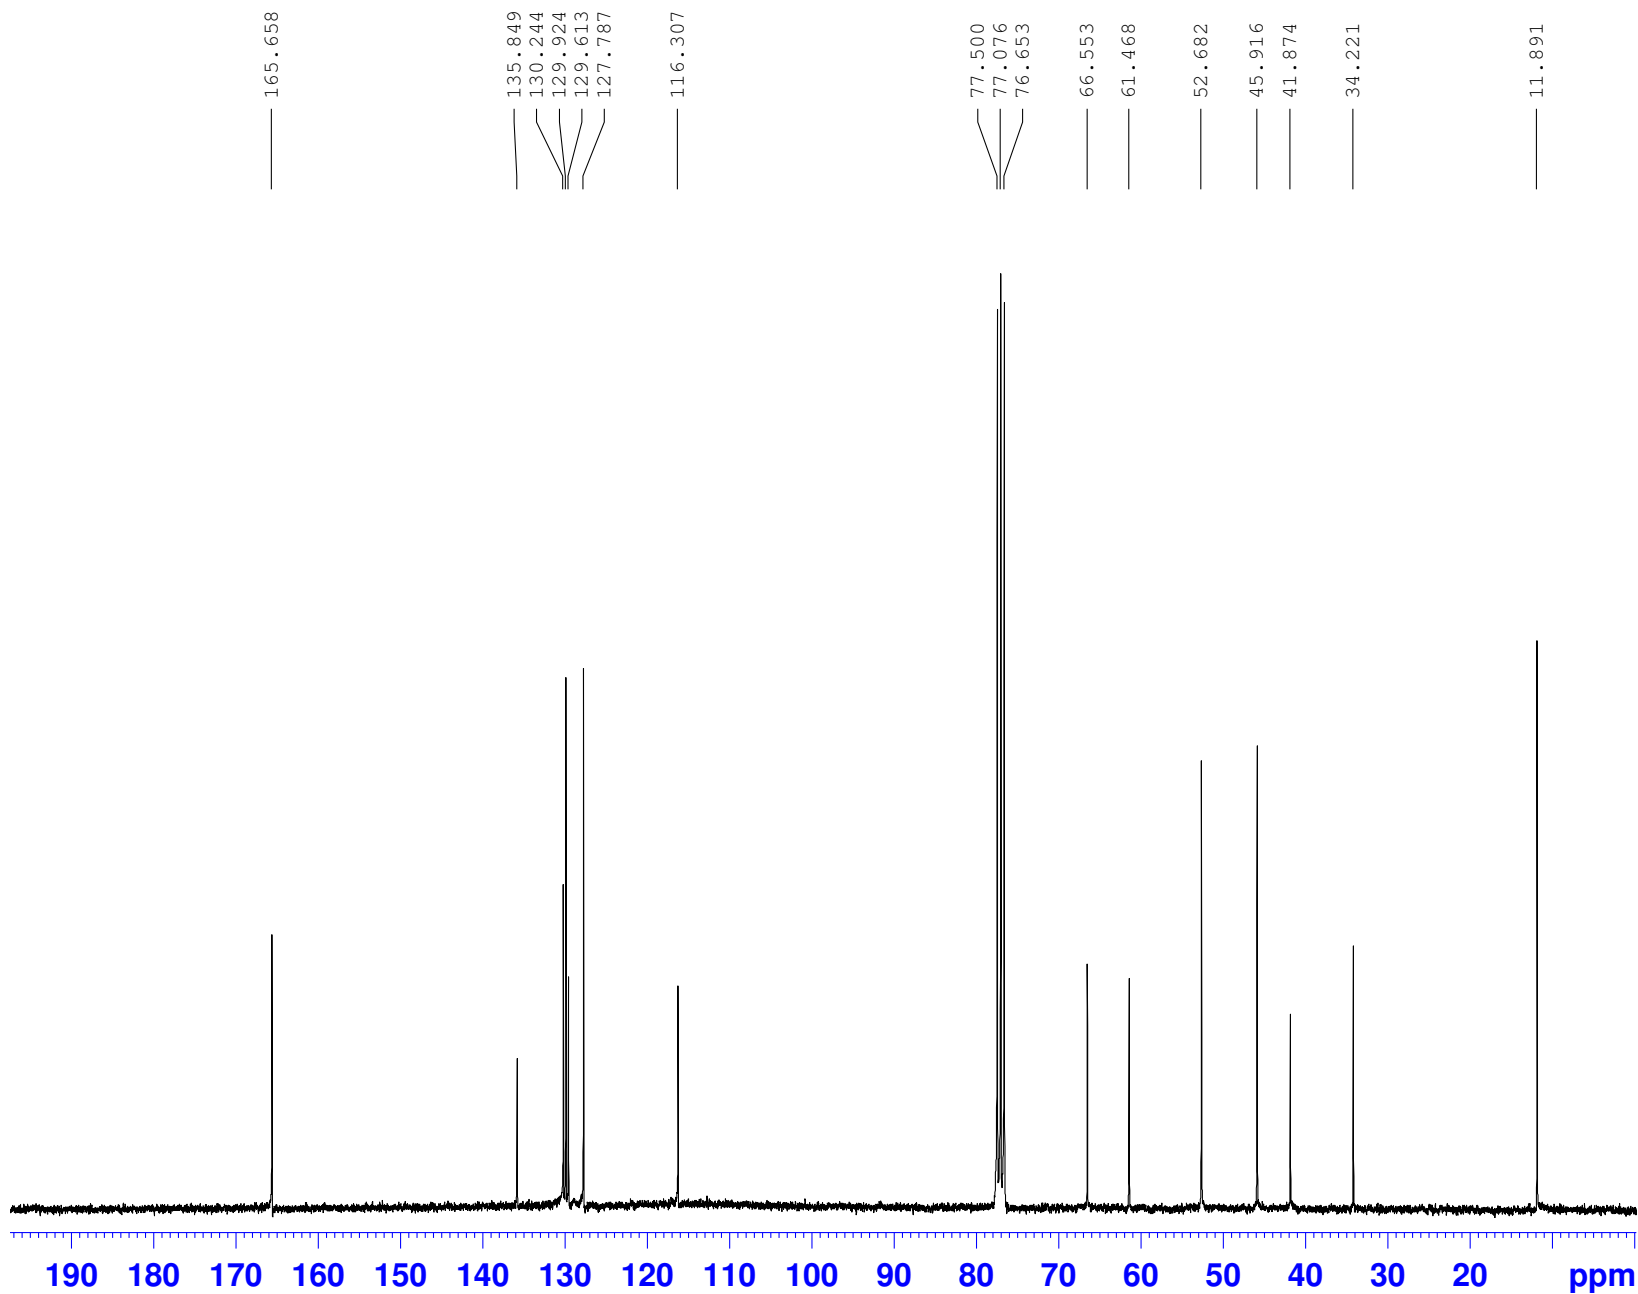

Current Data Parameters  
NAME Redzicka 1017  
EXPNO 2  
PROCNO 1

F2 - Acquisition Parameters  
Date\_ 20210721  
Time 2.01  
INSTRUM spect  
PROBHD 5 mm BBI 1H/D-  
PULPROG zgpg30  
TD 65536  
SOLVENT CDCl3  
NS 5120  
DS 2  
SWH 17985.611 Hz  
FIDRES 0.274439 Hz  
AQ 1.8219508 sec  
RG 18390.4  
DW 27.800 usec  
DE 20.00 usec  
TE 299.6 K  
D1 2.00000000 sec  
d11 0.03000000 sec  
DELTA 1.89999998 sec  
TD0 1

===== CHANNEL f1 =====  
NUC1 13C  
P1 11.90 usec  
PL1 -6.00 dB  
SFO1 75.4803248 MHz

===== CHANNEL f2 =====  
CPDPRG2 waltz16  
NUC2 1H  
PCPD2 100.00 usec  
PL2 2.00 dB  
PL12 21.66 dB  
PL13 23.00 dB  
SFO2 300.1512006 MHz

F2 - Processing parameters  
SI 32768  
SF 75.4727782 MHz  
WDW EM  
SSB 0  
LB 1.00 Hz  
GB 0  
PC 2.00

3m H

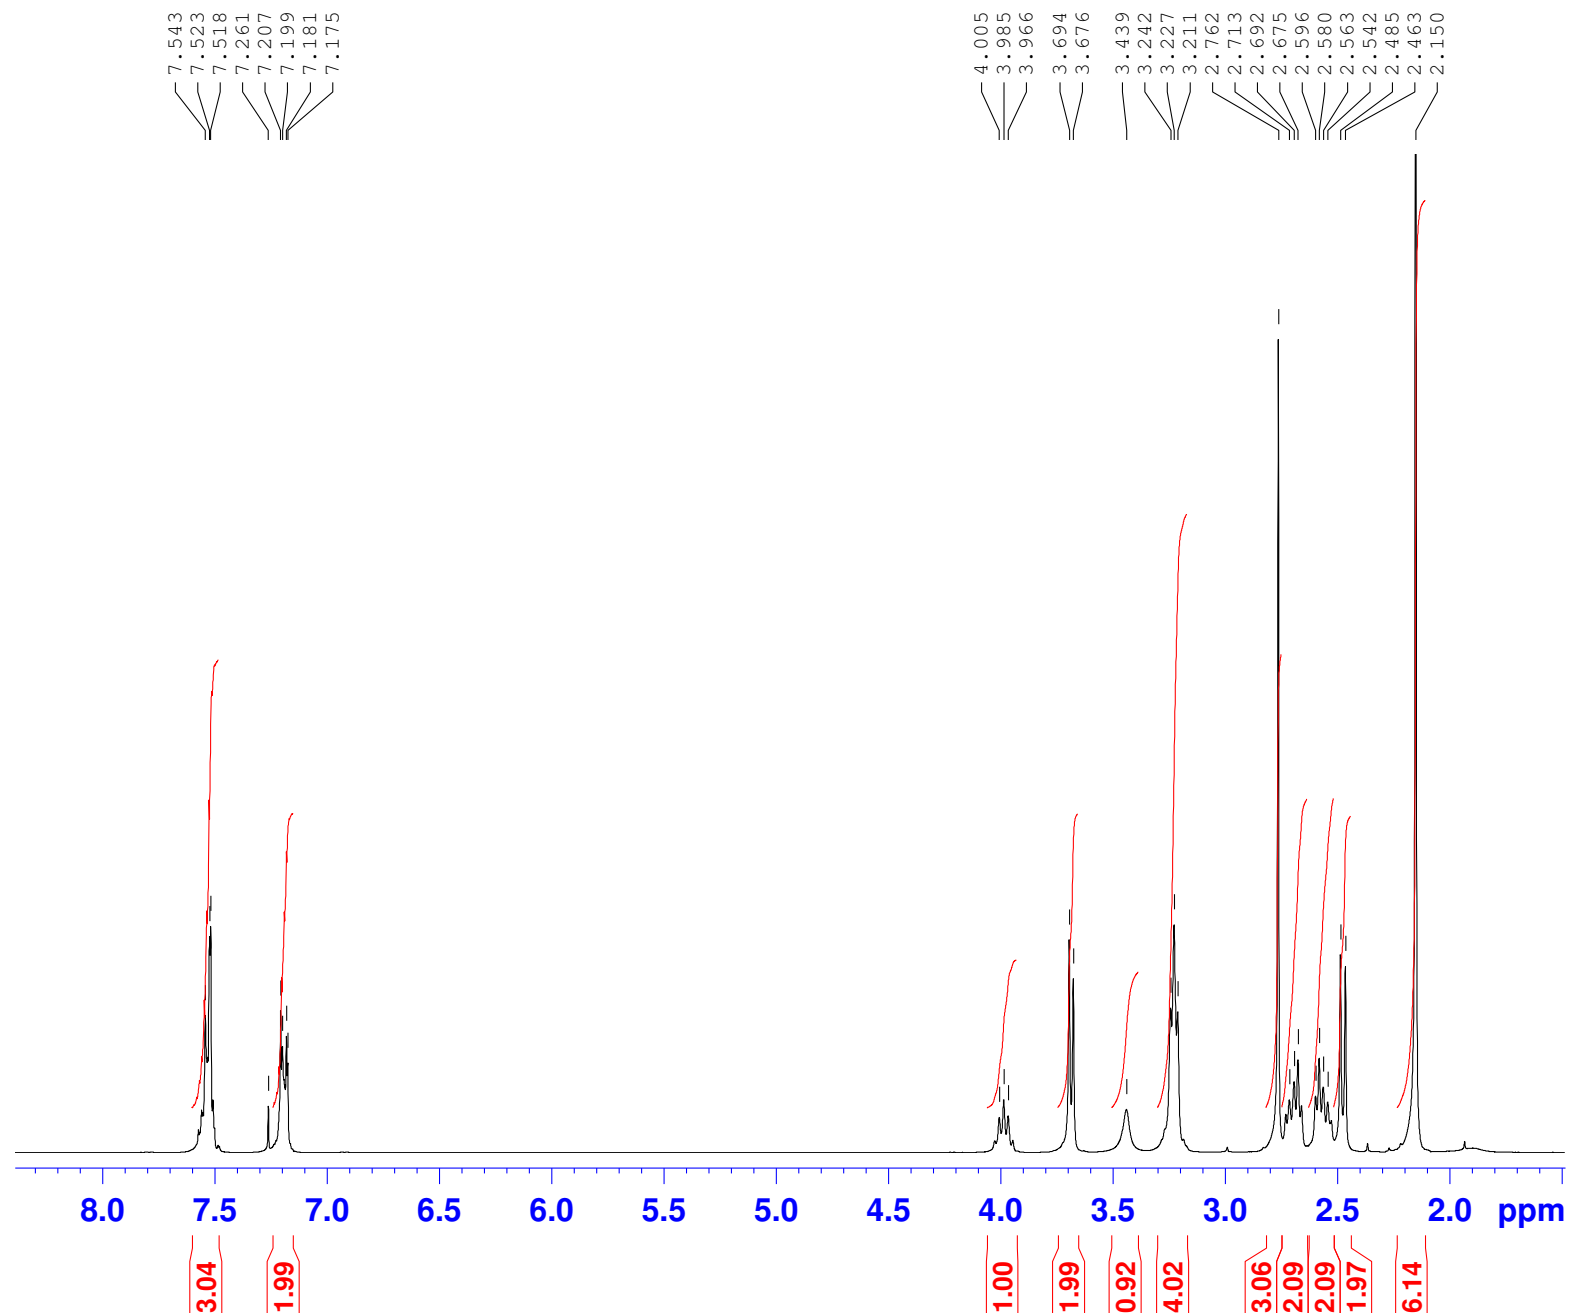

Current Data Parameters  
NAME Redzicka 1017  
EXPNO 1  
PROCNO 1

F2 - Acquisition Parameters  
Date\_ 20210720  
Time 20.25  
INSTRUM spect  
PROBHD 5 mm BBI 1H/D-  
PULPROG zg30  
TD 65536  
SOLVENT CDCl3  
NS 16  
DS 0  
SWH 6172.839 Hz  
FIDRES 0.094190 Hz  
AQ 5.3084660 sec  
RG 71.8  
DW 81.000 usec  
DE 8.00 usec  
TE 298.0 K  
D1 1.00000000 sec  
TD0 1

===== CHANNEL f1 =====  
NUC1 1H  
P1 10.40 usec  
PL1 2.00 dB  
SFO1 300.1518535 MHz

F2 - Processing parameters  
SI 32768  
SF 300.1500045 MHz  
WDW EM  
SSB 0  
LB 0.30 Hz  
GB 0  
PC 20.00



3n C

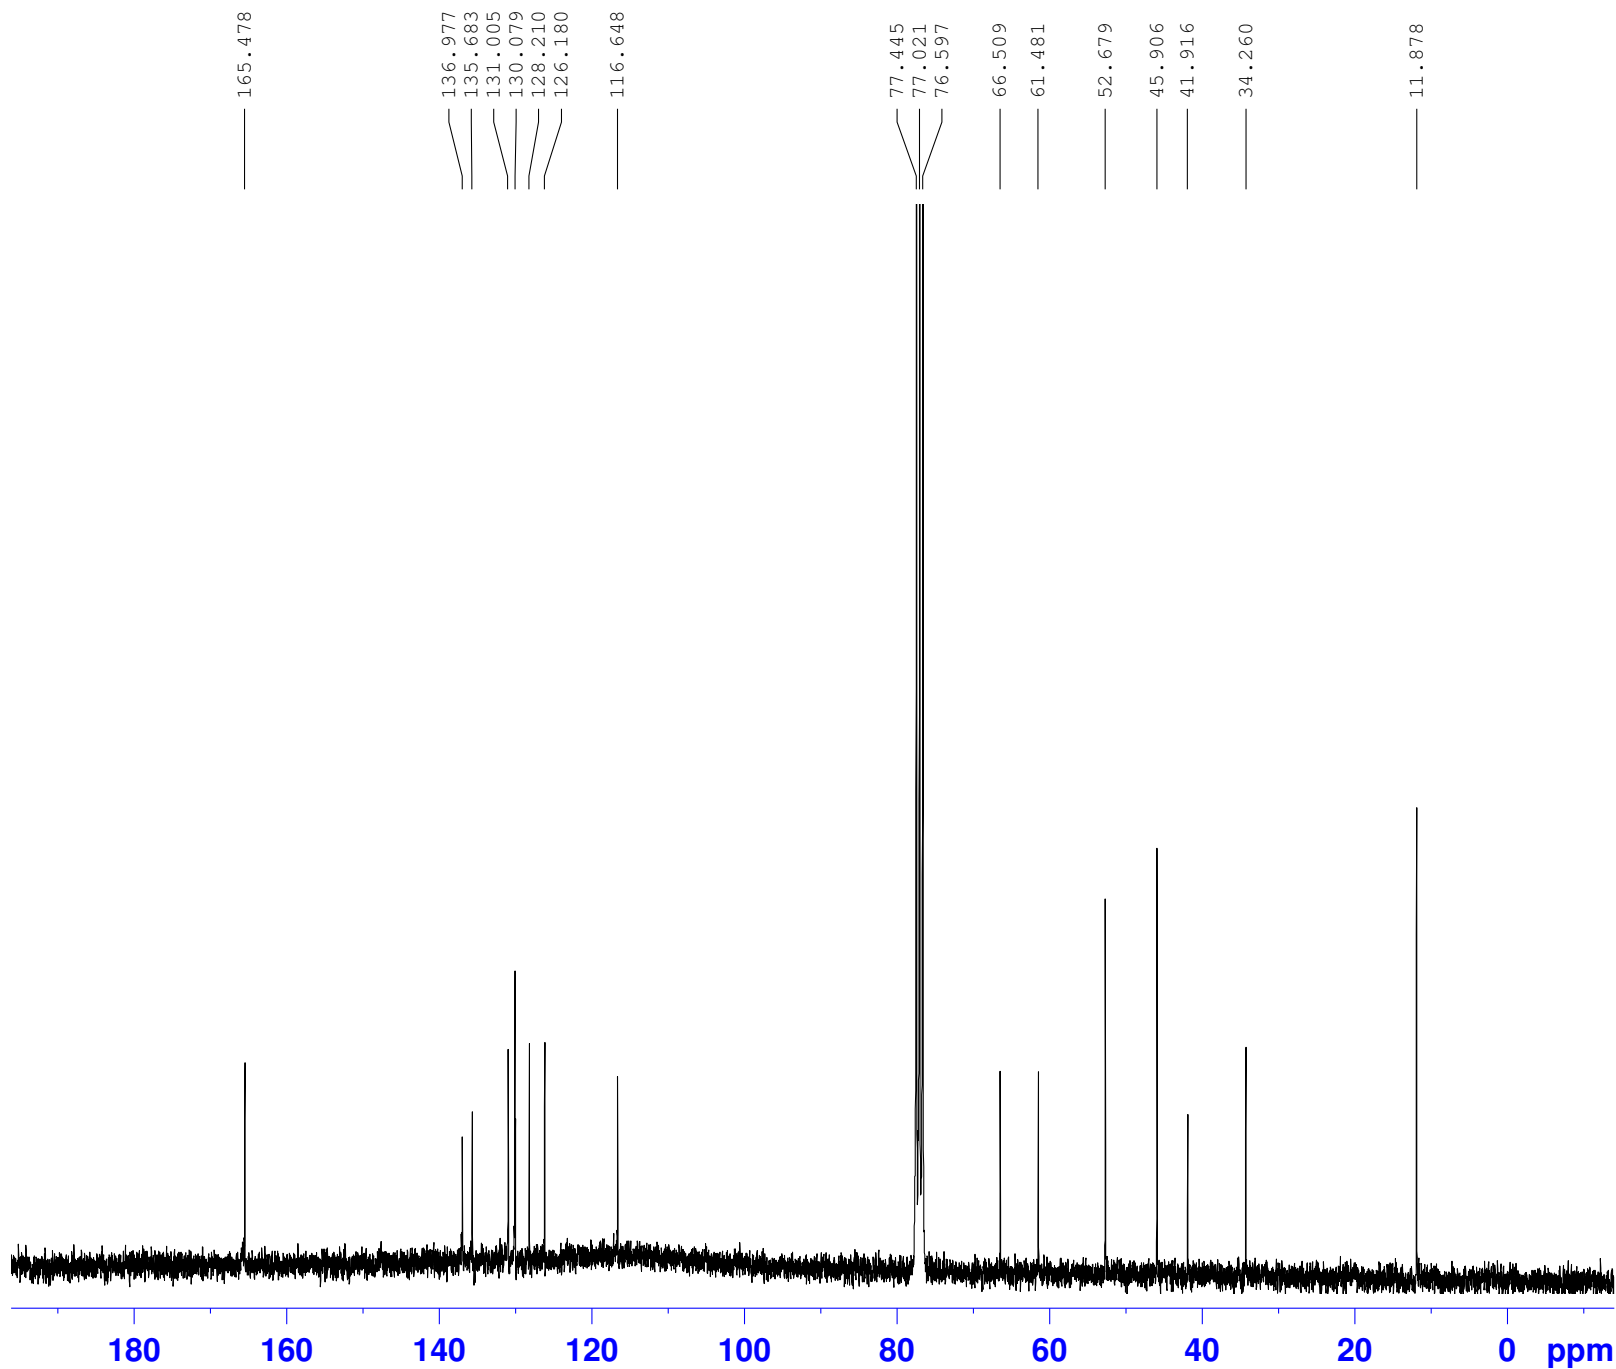

Current Data Parameters  
NAME Redzicka 1113  
EXPNO 3  
PROCNO 1

F2 - Acquisition Parameters  
Date\_ 20210825  
Time 15.35  
INSTRUM spect  
PROBHD 5 mm BBI 1H/D-  
PULPROG zgpg30  
TD 65536  
SOLVENT CDCl3  
NS 4096  
DS 2  
SWH 17985.611 Hz  
FIDRES 0.274439 Hz  
AQ 1.8219508 sec  
RG 9195.2  
DW 27.800 usec  
DE 20.00 usec  
TE 299.6 K  
D1 2.00000000 sec  
d11 0.03000000 sec  
DELTA 1.89999998 sec  
TD0 1

===== CHANNEL f1 =====  
NUC1 13C  
P1 11.90 usec  
PL1 -6.00 dB  
SFO1 75.4803248 MHz

===== CHANNEL f2 =====  
CPDPRG2 waltz16  
NUC2 1H  
PCPD2 100.00 usec  
PL2 2.00 dB  
PL12 21.66 dB  
PL13 23.00 dB  
SFO2 300.1512006 MHz

F2 - Processing parameters  
SI 32768  
SF 75.4727782 MHz  
WDW EM  
SSB 0  
LB 1.00 Hz  
GB 0  
PC 10.00

3n H

7.526  
7.520  
7.513  
7.498  
7.262  
7.240  
7.235  
7.133  
7.111

3.998  
3.707  
3.688  
3.400  
3.257  
3.241  
3.225  
2.777  
2.732  
2.709  
2.692  
2.678  
2.591  
2.572  
2.551  
2.495  
2.473  
2.184  
1.720



Current Data Parameters  
NAME Redzicka 1113  
EXPNO 2  
PROCNO 1

F2 - Acquisition Parameters  
Date\_ 20210825  
Time 11.05  
INSTRUM spect  
PROBHD 5 mm BBI 1H/D-  
PULPROG zg30  
TD 65536  
SOLVENT CDC13  
NS 16  
DS 0  
SWH 6172.839 Hz  
FIDRES 0.094190 Hz  
AQ 5.3084660 sec  
RG 181  
DW 81.000 usec  
DE 8.00 usec  
TE 298.5 K  
D1 1.00000000 sec  
TD0 1

===== CHANNEL f1 =====  
NUC1 1H  
P1 10.40 usec  
PL1 2.00 dB  
SFO1 300.1518535 MHz

F2 - Processing parameters  
SI 32768  
SF 300.1500045 MHz  
WDW EM  
SSB 0  
LB 0.30 Hz  
GB 0  
PC 10.00

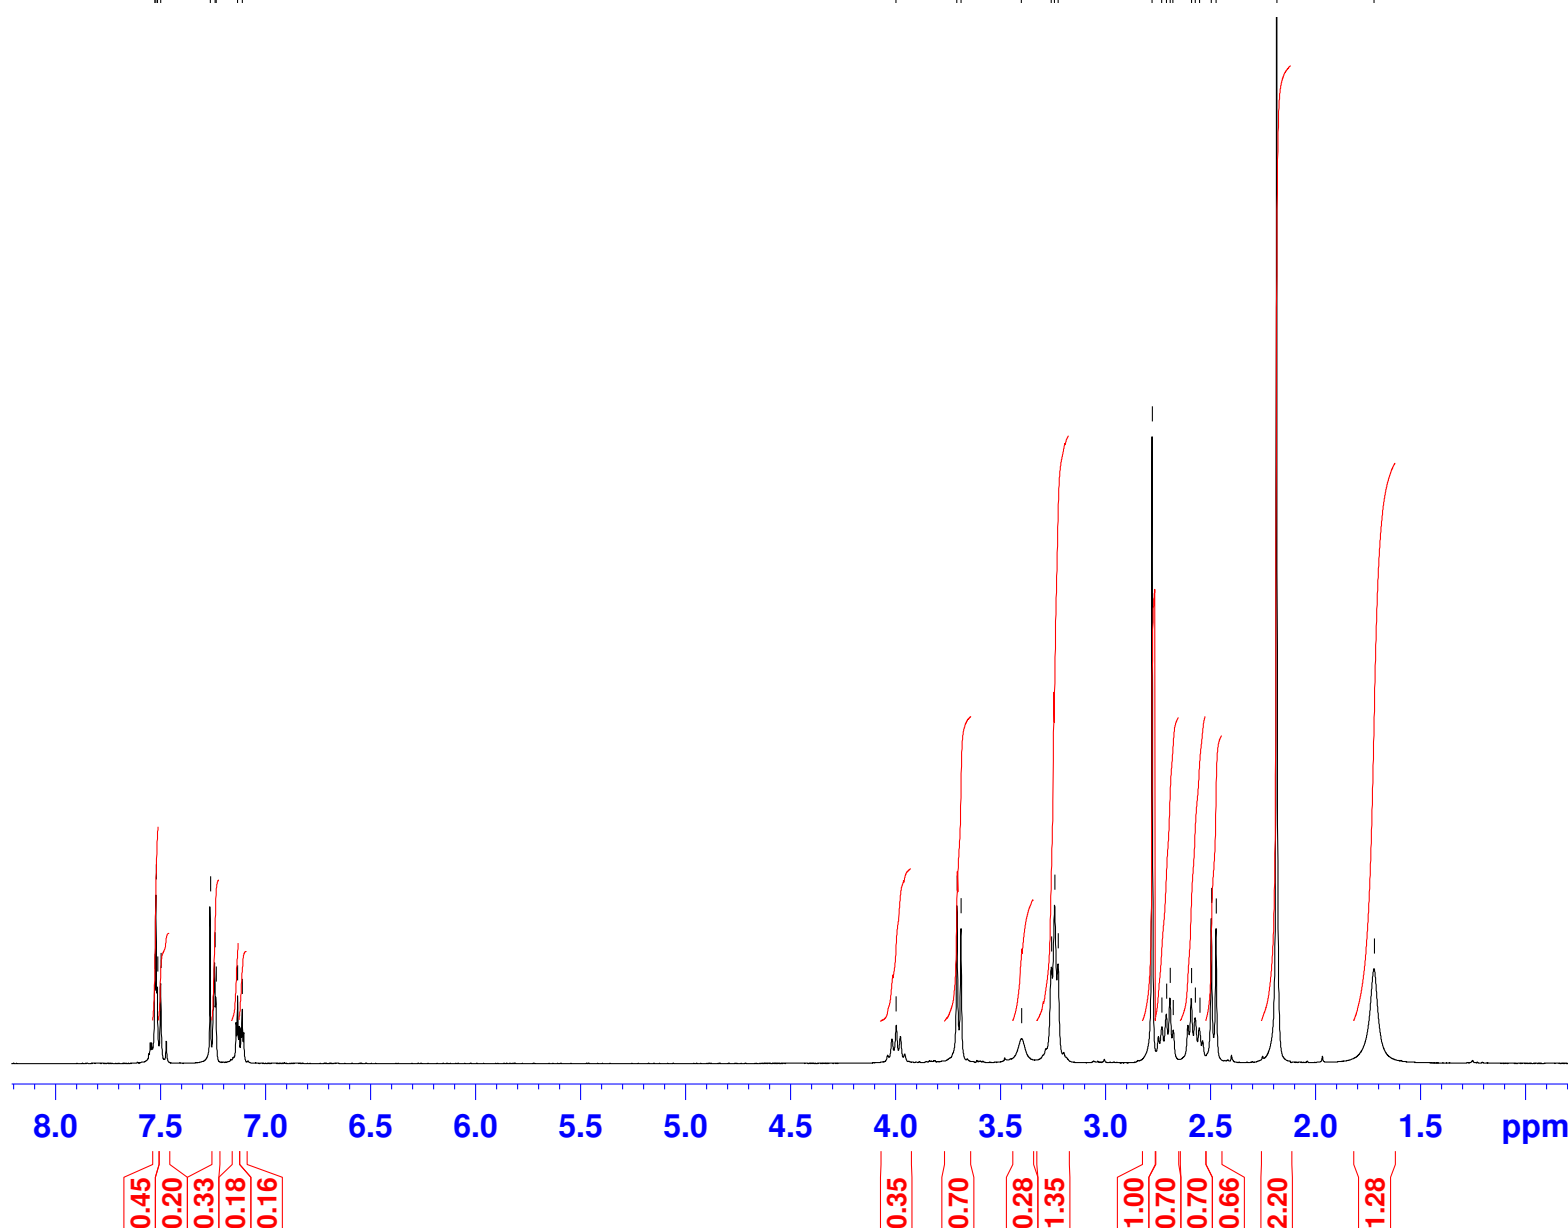

30 C

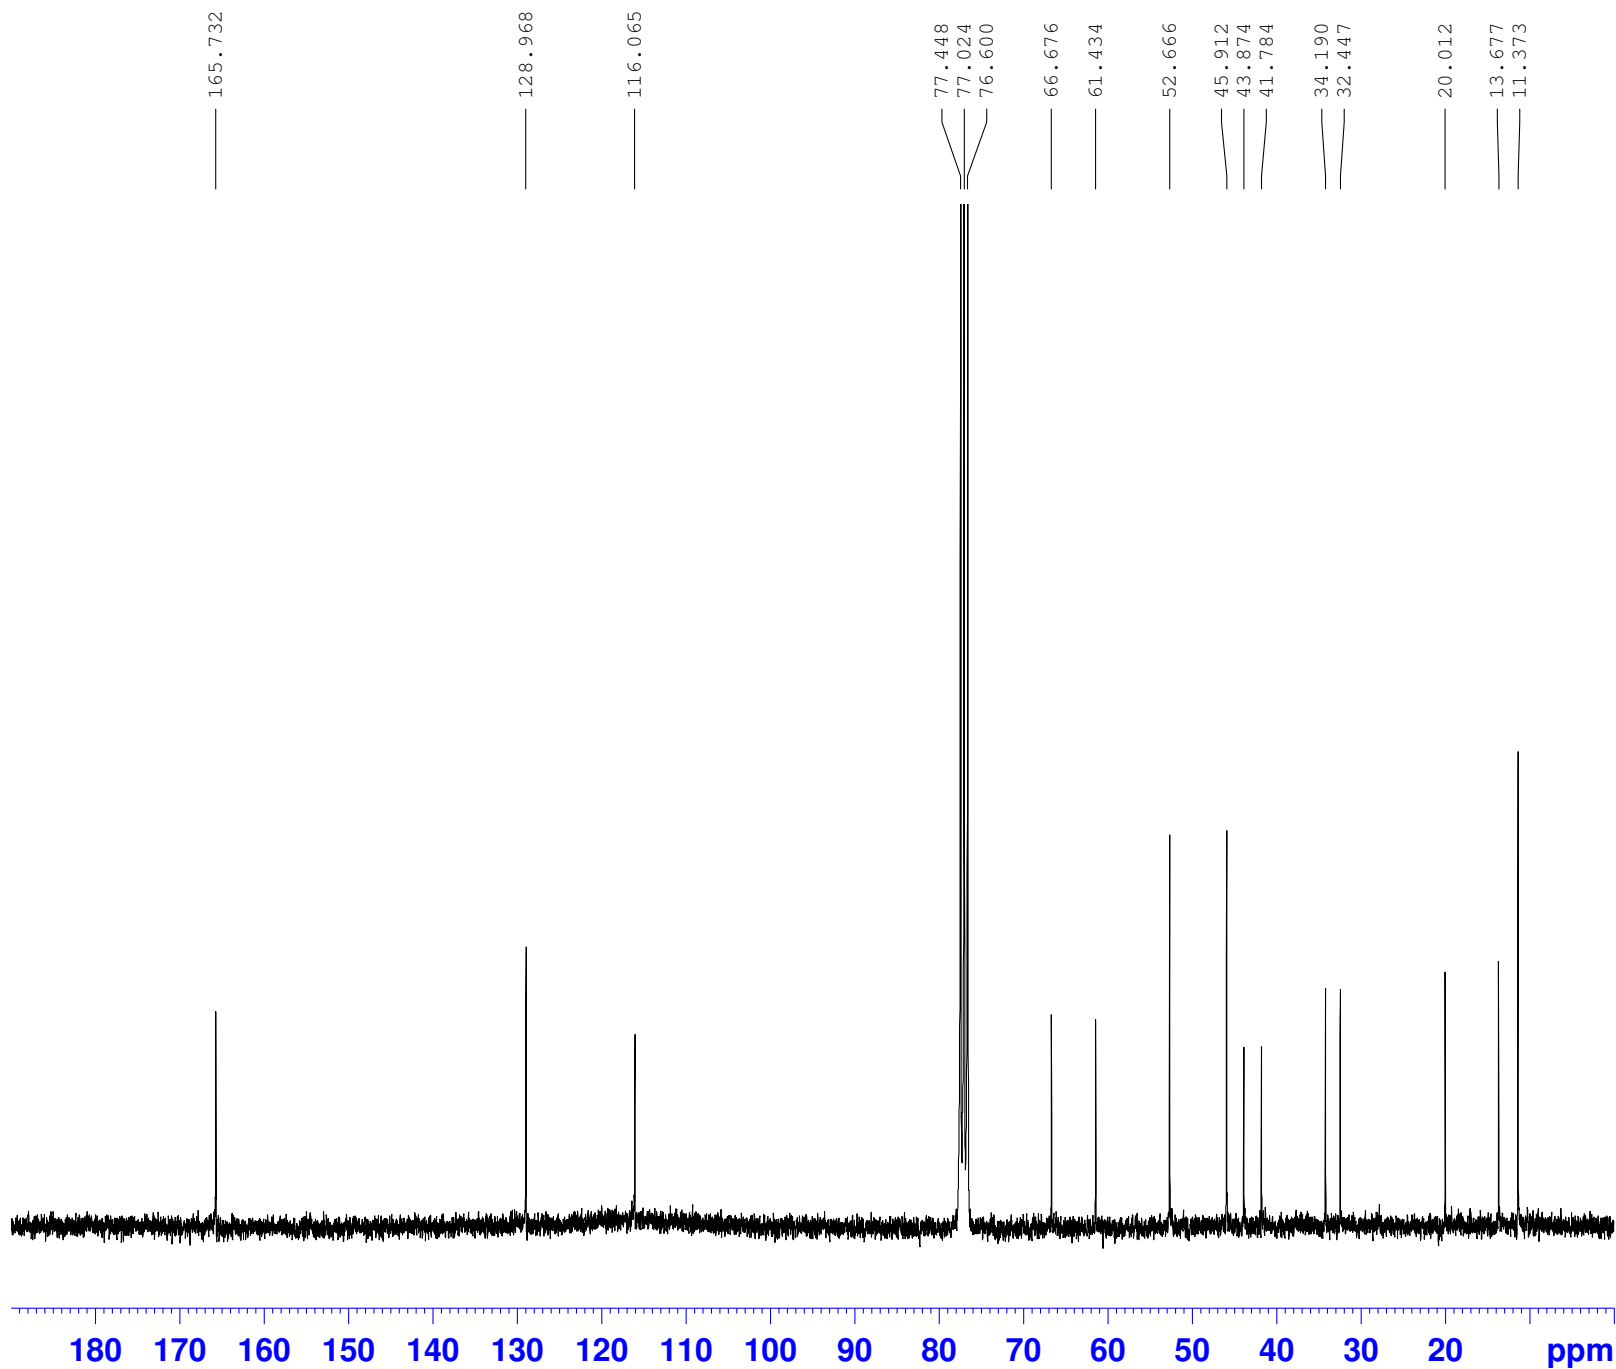

Current Data Parameters  
NAME Redzicka 1112  
EXPNO 2  
PROCNO 1

F2 - Acquisition Parameters  
Date\_ 20210824  
Time 21.25  
INSTRUM spect  
PROBHD 5 mm BBI 1H/D-  
PULPROG zgpg30  
TD 65536  
SOLVENT CDCl3  
NS 5120  
DS 2  
SWH 17985.611 Hz  
FIDRES 0.274439 Hz  
AQ 1.8219508 sec  
RG 11585.2  
DW 27.800 usec  
DE 20.00 usec  
TE 299.5 K  
D1 2.00000000 sec  
d11 0.03000000 sec  
DELTA 1.89999998 sec  
TD0 1

===== CHANNEL f1 =====  
NUC1 13C  
P1 11.00 usec  
PL1 -6.00 dB  
SFO1 75.4803248 MHz

===== CHANNEL f2 =====  
CPDPRG2 waltz16  
NUC2 1H  
PCPD2 100.00 usec  
PL2 2.00 dB  
PL12 21.45 dB  
PL13 23.00 dB  
SFO2 300.1512006 MHz

F2 - Processing parameters  
SI 32768  
SF 75.4727780 MHz  
WDW EM  
SSB 0  
LB 1.00 Hz  
GB 0  
PC 2.00

<sup>3</sup>O H

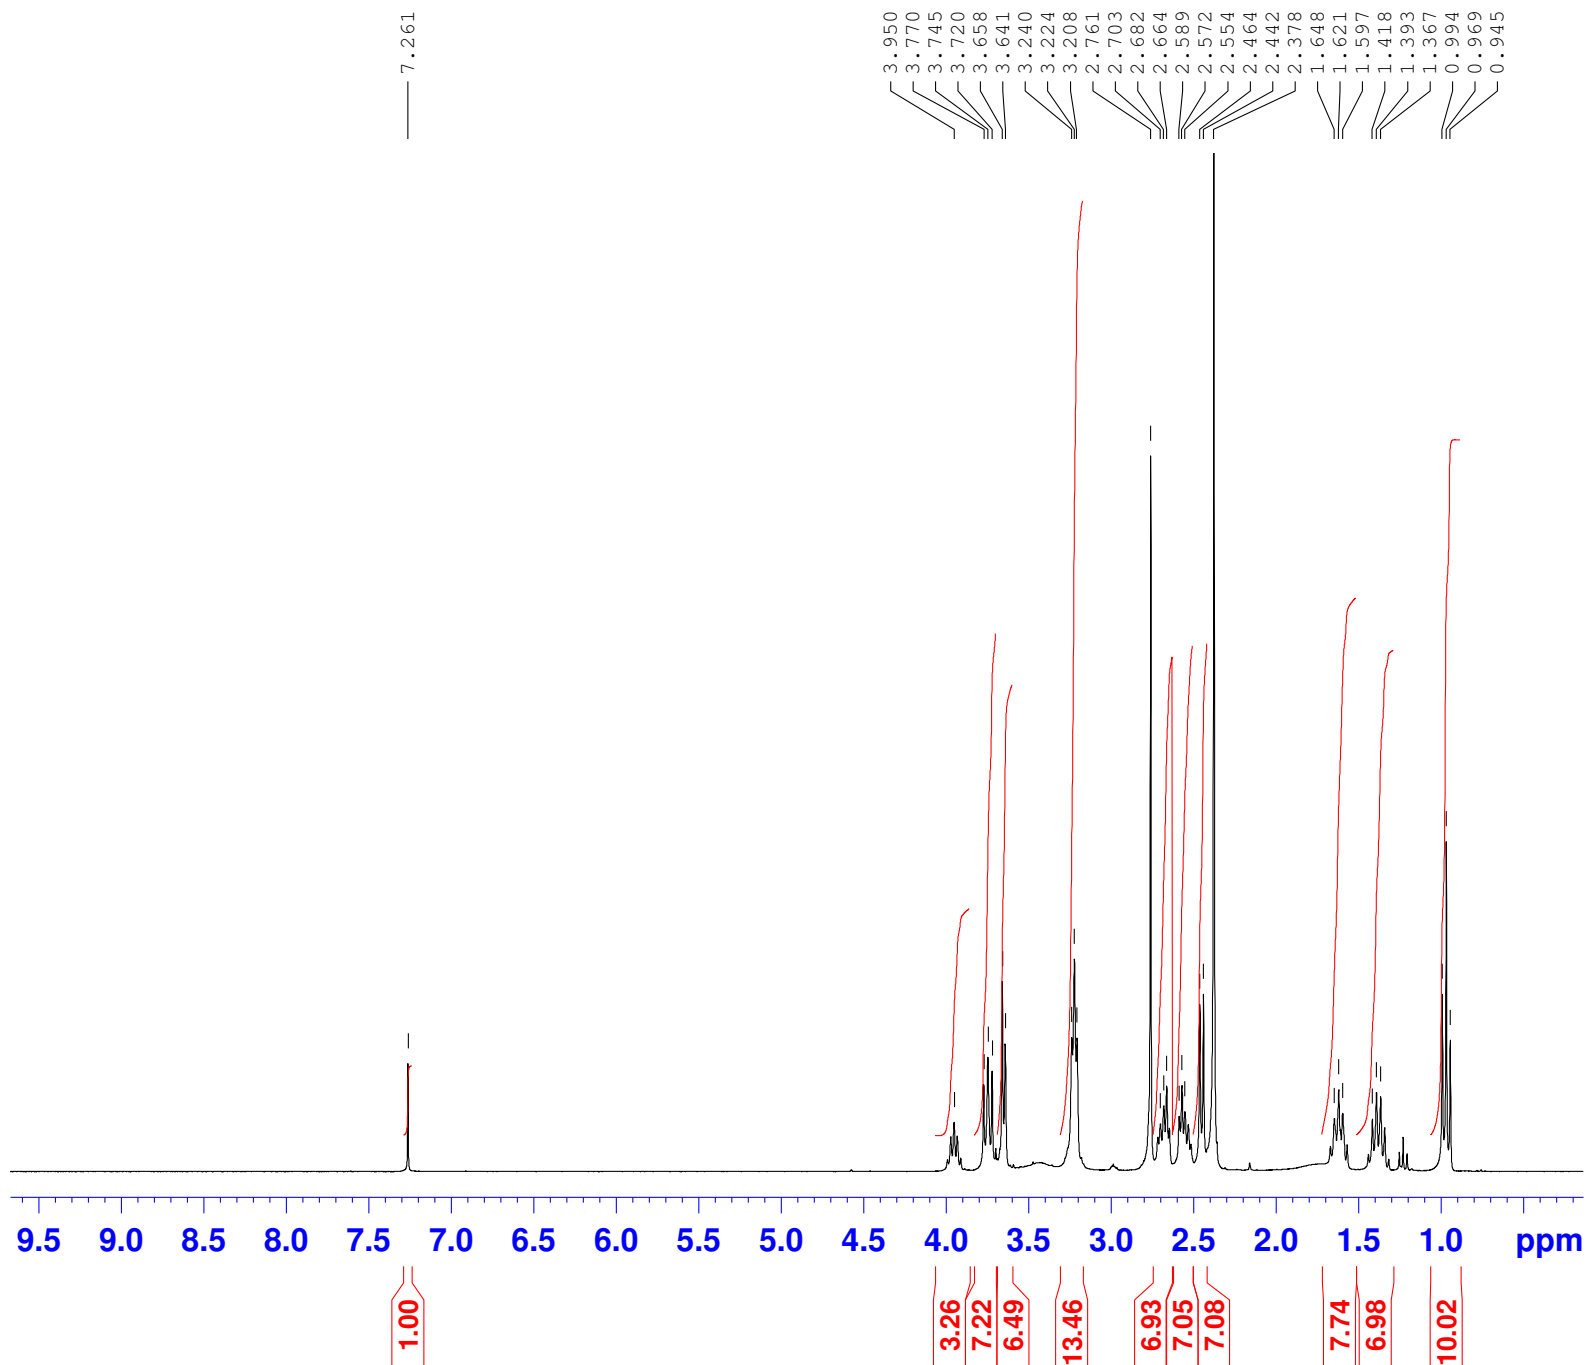

Current Data Parameters  
NAME Redzicka 1112  
EXPNO 1  
PROCNO 1

F2 - Acquisition Parameters  
Date\_ 20210825  
Time 8.31  
INSTRUM spect  
PROBHD 5 mm BBI 1H/D-  
PULPROG zg30  
TD 65536  
SOLVENT CDCl<sub>3</sub>  
NS 16  
DS 0  
SWH 6172.839 Hz  
FIDRES 0.094190 Hz  
AQ 5.3084660 sec  
RG 80.6  
DW 81.000 usec  
DE 8.00 usec  
TE 298.5 K  
D1 1.00000000 sec  
TD0 1

===== CHANNEL f1 =====  
NUC1 1H  
P1 10.40 usec  
PL1 2.00 dB  
SFO1 300.1518535 MHz

F2 - Processing parameters  
SI 32768  
SF 300.1500045 MHz  
WDW EM  
SSB 0  
LB 0.30 Hz  
GB 0  
PC 0.50

2c C

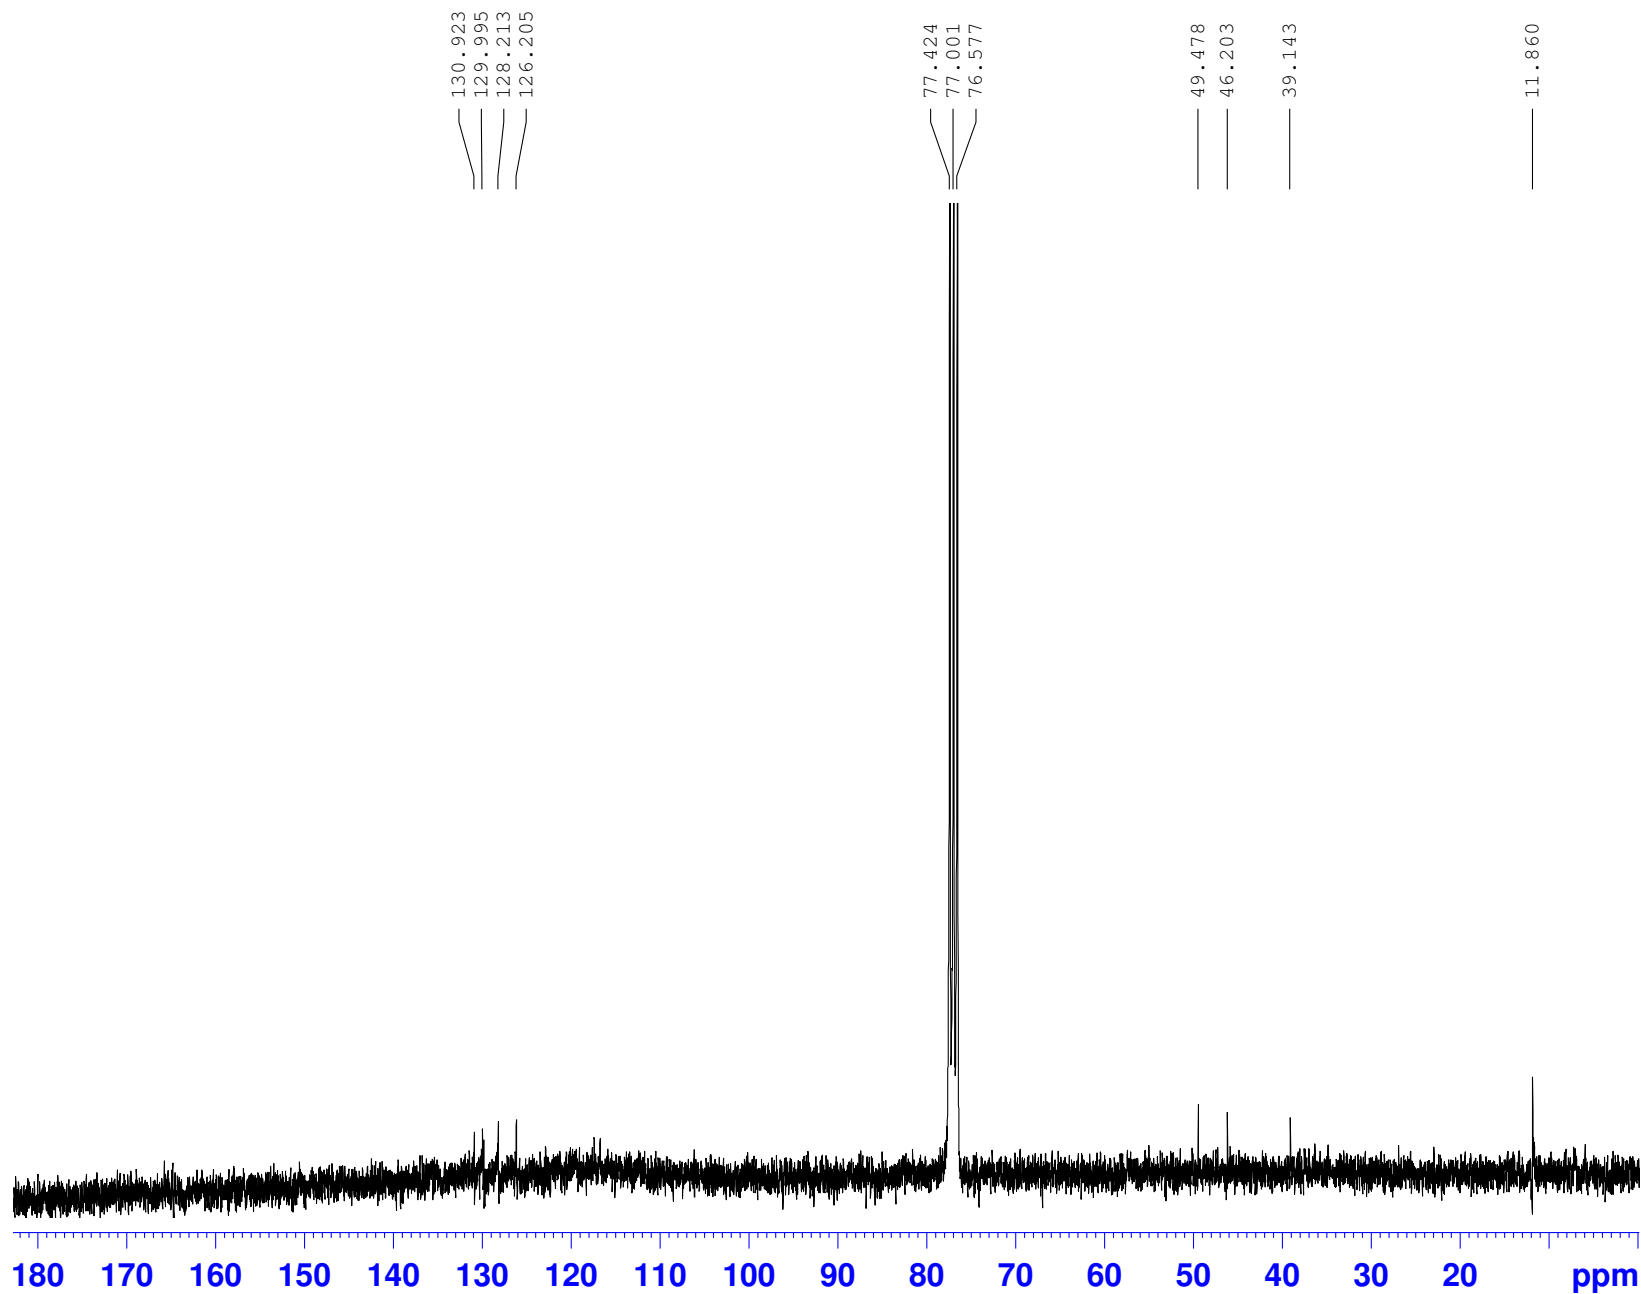

Current Data Parameters  
NAME Redzicka 1100  
EXPNO 2  
PROCNO 1

F2 - Acquisition Parameters  
Date\_ 20210817  
Time 20.38  
INSTRUM spect  
PROBHD 5 mm BBI 1H/D-  
PULPROG zgpg30  
TD 65536  
SOLVENT CDCl3  
NS 5120  
DS 2  
SWH 17985.611 Hz  
FIDRES 0.274439 Hz  
AQ 1.8219508 sec  
RG 26008  
DW 27.800 usec  
DE 20.00 usec  
TE 299.4 K  
D1 2.00000000 sec  
d11 0.03000000 sec  
DELTA 1.89999998 sec  
TD0 1

===== CHANNEL f1 =====  
NUC1 13C  
P1 11.00 usec  
PL1 -6.00 dB  
SFO1 75.4803248 MHz

===== CHANNEL f2 =====  
CPDPRG2 waltz16  
NUC2 1H  
PCPD2 100.00 usec  
PL2 2.00 dB  
PL12 21.45 dB  
PL13 23.00 dB  
SFO2 300.1512006 MHz

F2 - Processing parameters  
SI 32768  
SF 75.4727780 MHz  
WDW EM  
SSB 0  
LB 1.00 Hz  
GB 0  
PC 2.00

2c H

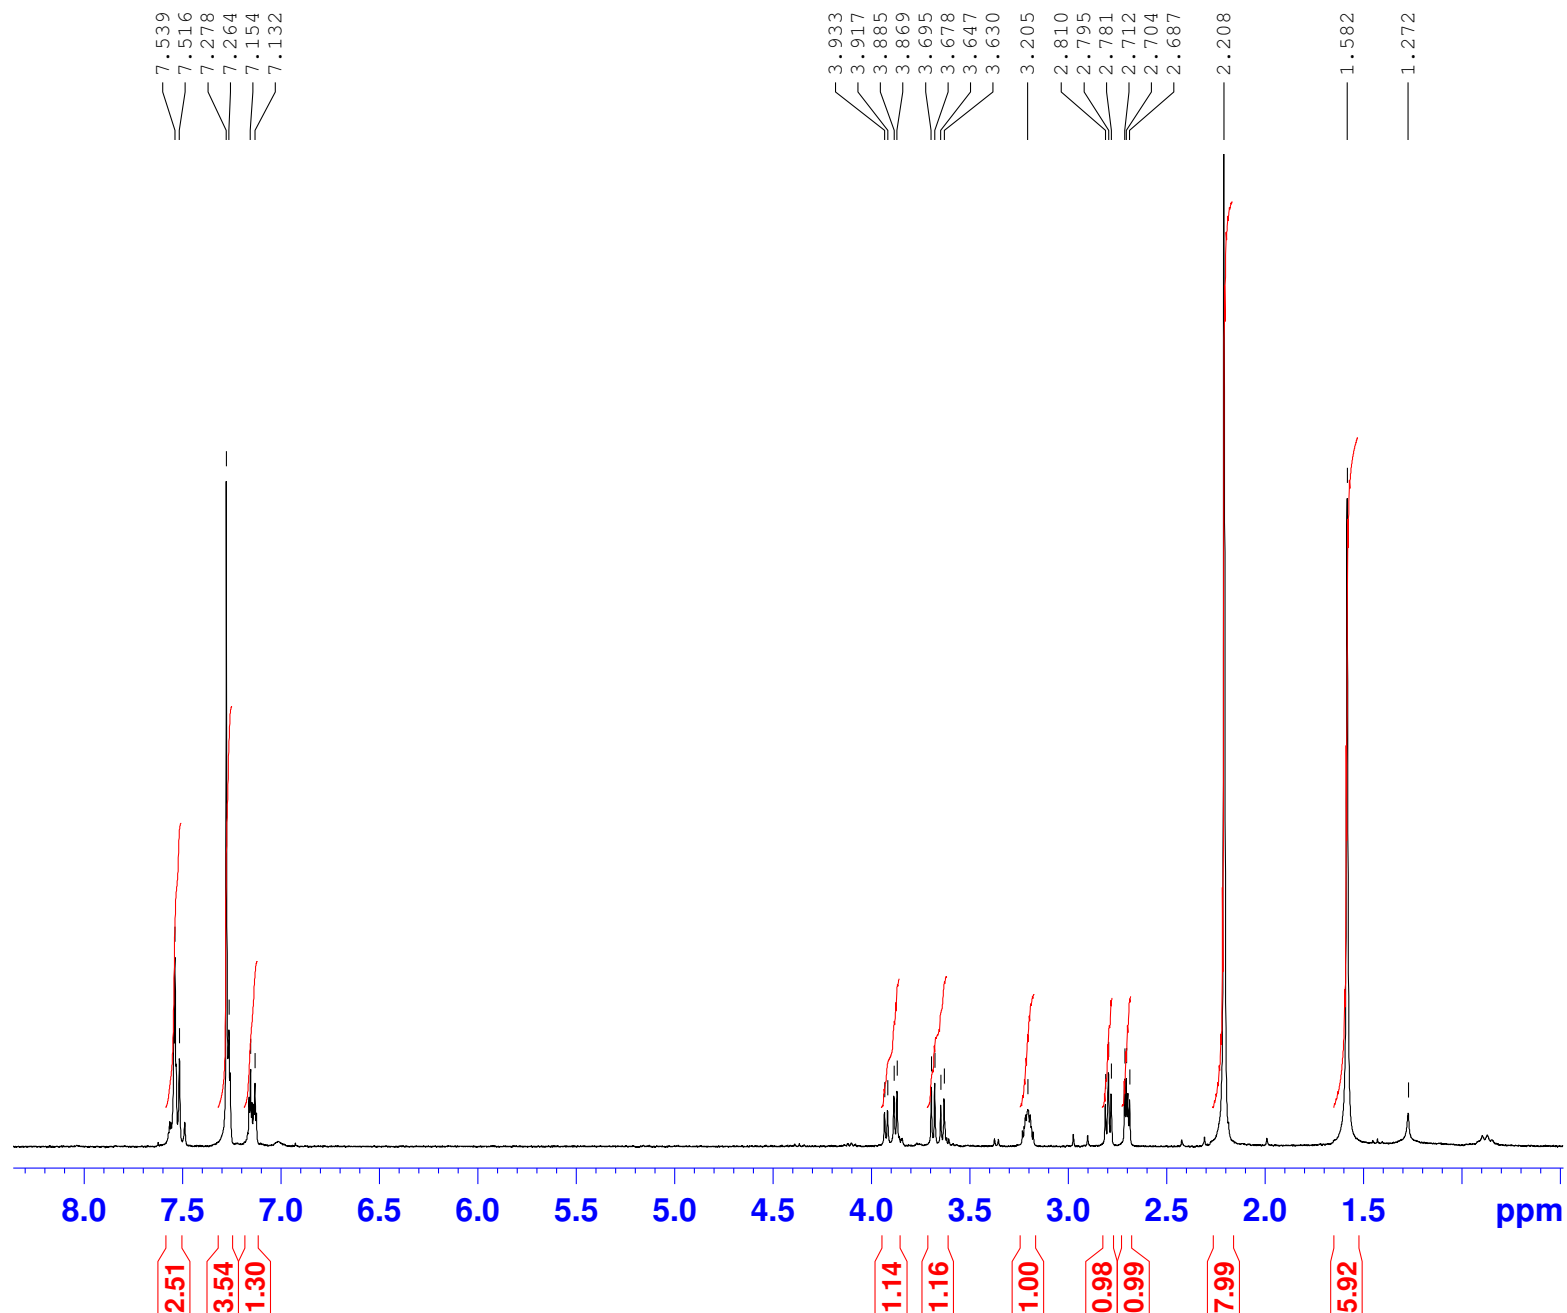

Current Data Parameters  
 NAME Redzicka 1100  
 EXPNO 1  
 PROCNO 1

F2 - Acquisition Parameters  
 Date\_ 20210817  
 Time 15.05  
 INSTRUM spect  
 PROBHD 5 mm BBI 1H/D-  
 PULPROG zg30  
 TD 65536  
 SOLVENT CDCl3  
 NS 16  
 DS 0  
 SWH 6172.839 Hz  
 FIDRES 0.094190 Hz  
 AQ 5.3084660 sec  
 RG 812.7  
 DW 81.000 usec  
 DE 8.00 usec  
 TE 298.1 K  
 D1 1.00000000 sec  
 TD0 1

===== CHANNEL f1 =====  
 NUC1 1H  
 P1 11.00 usec  
 PL1 2.50 dB  
 SFO1 300.1518535 MHz

F2 - Processing parameters  
 SI 32768  
 SF 300.150000 MHz  
 WDW EM  
 SSB 0  
 LB 0.30 Hz  
 GB 0  
 PC 20.00

3 a

## Window Display Report

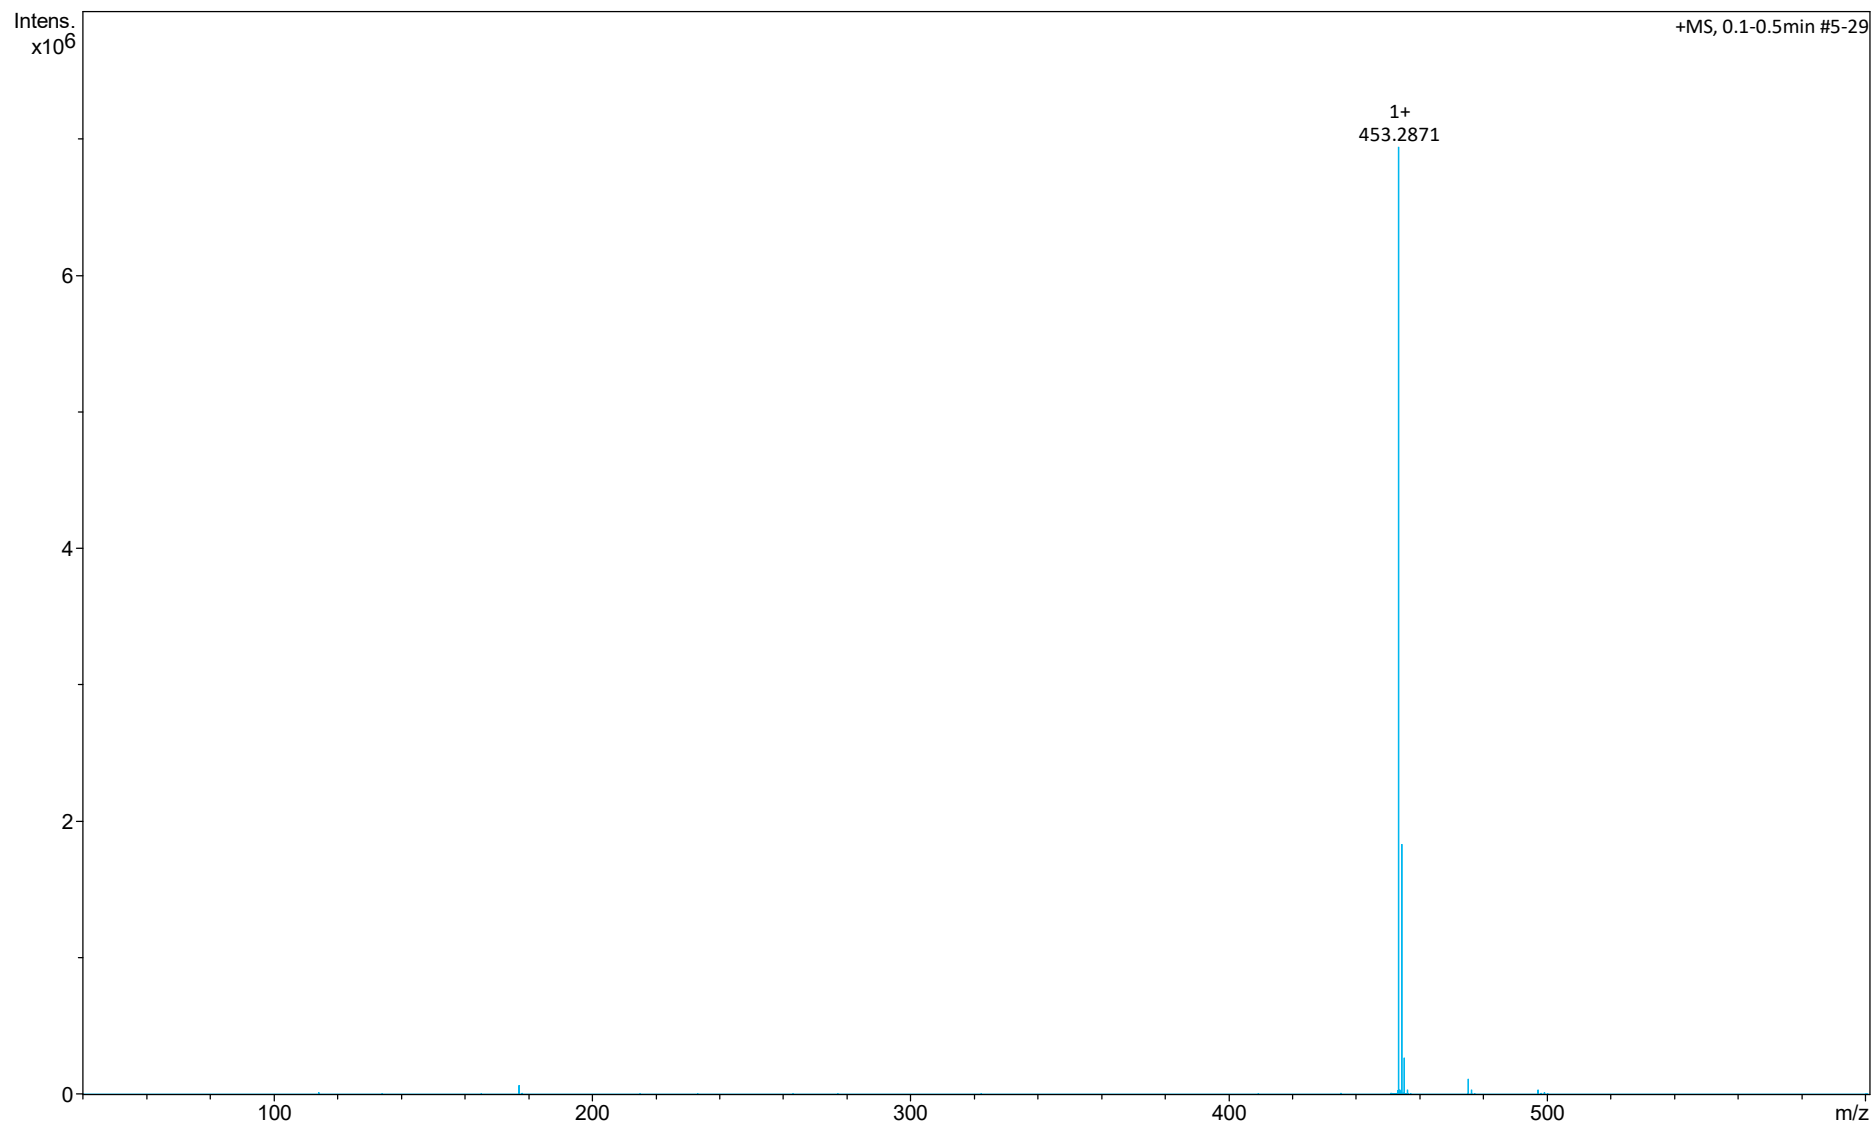

3 b

## Window Display Report

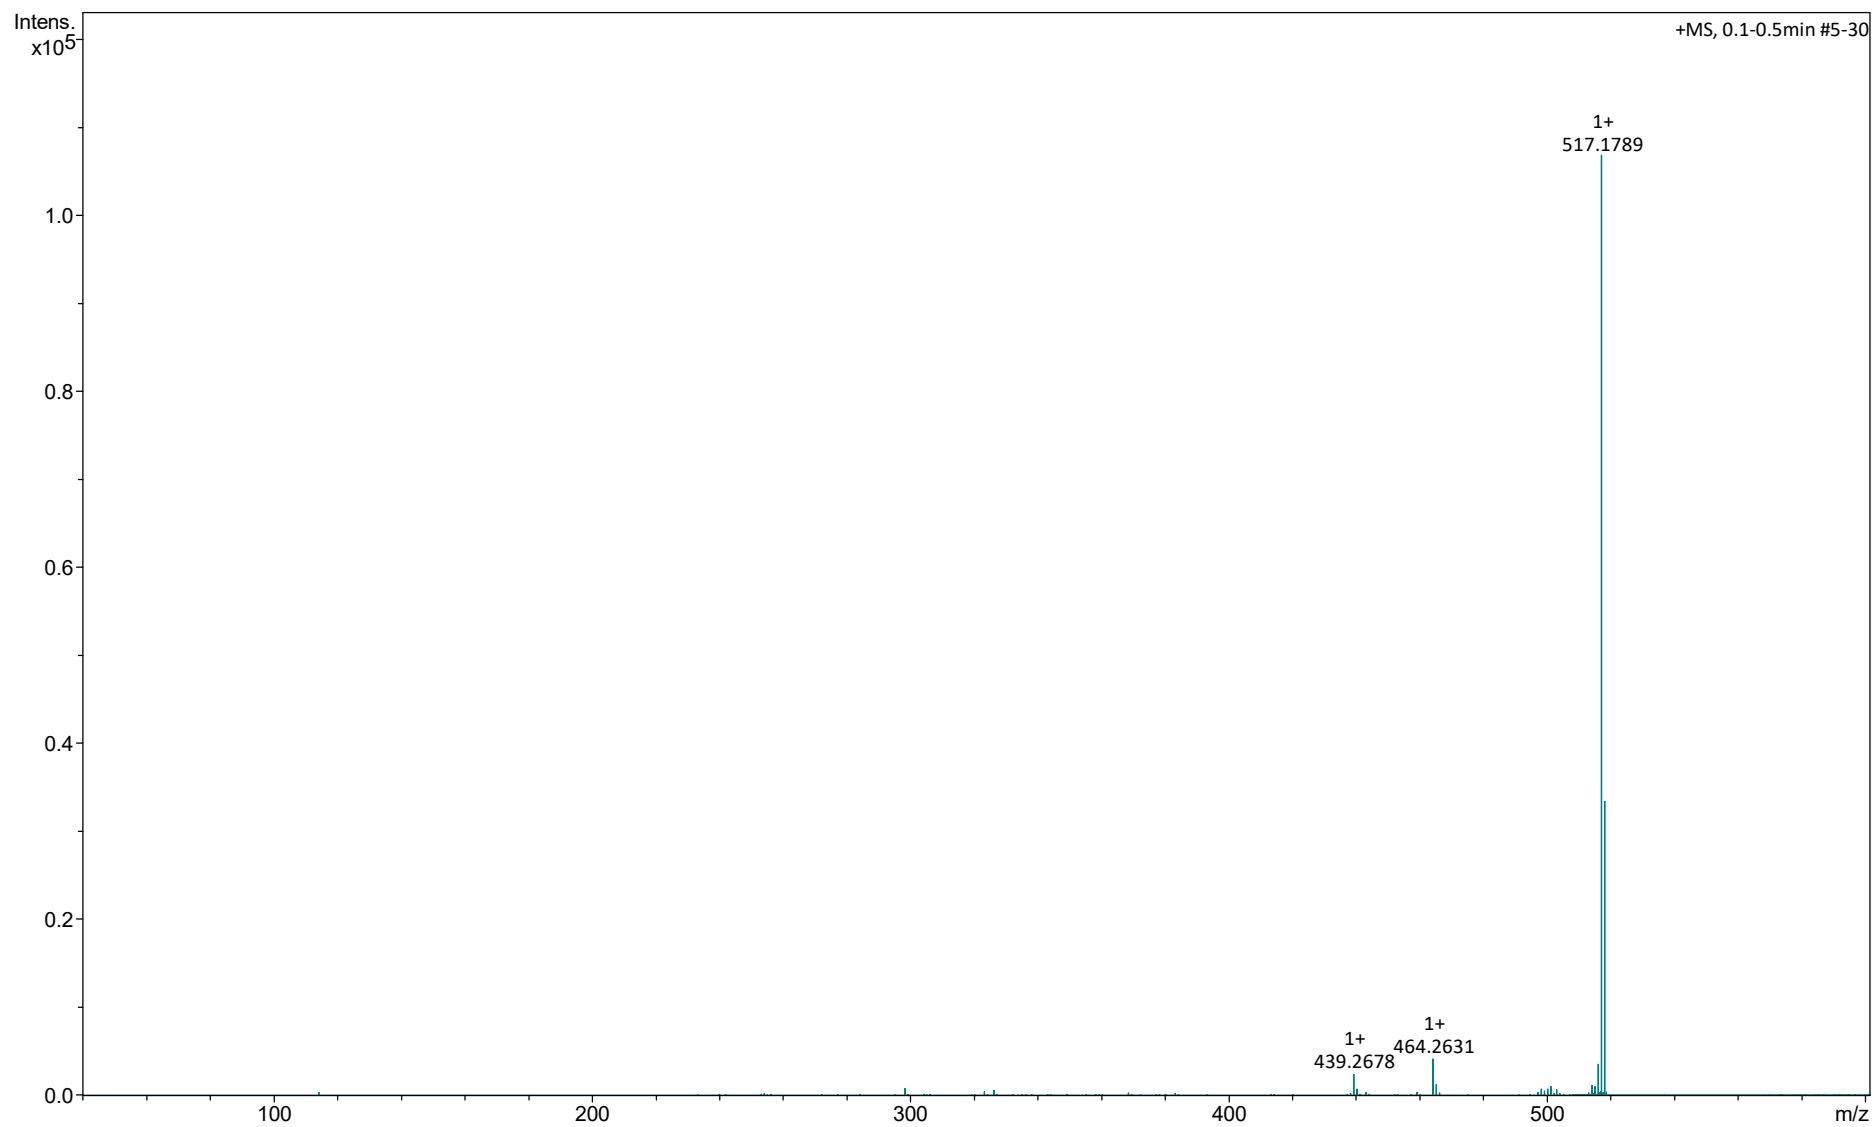



3 c

## Window Display Report

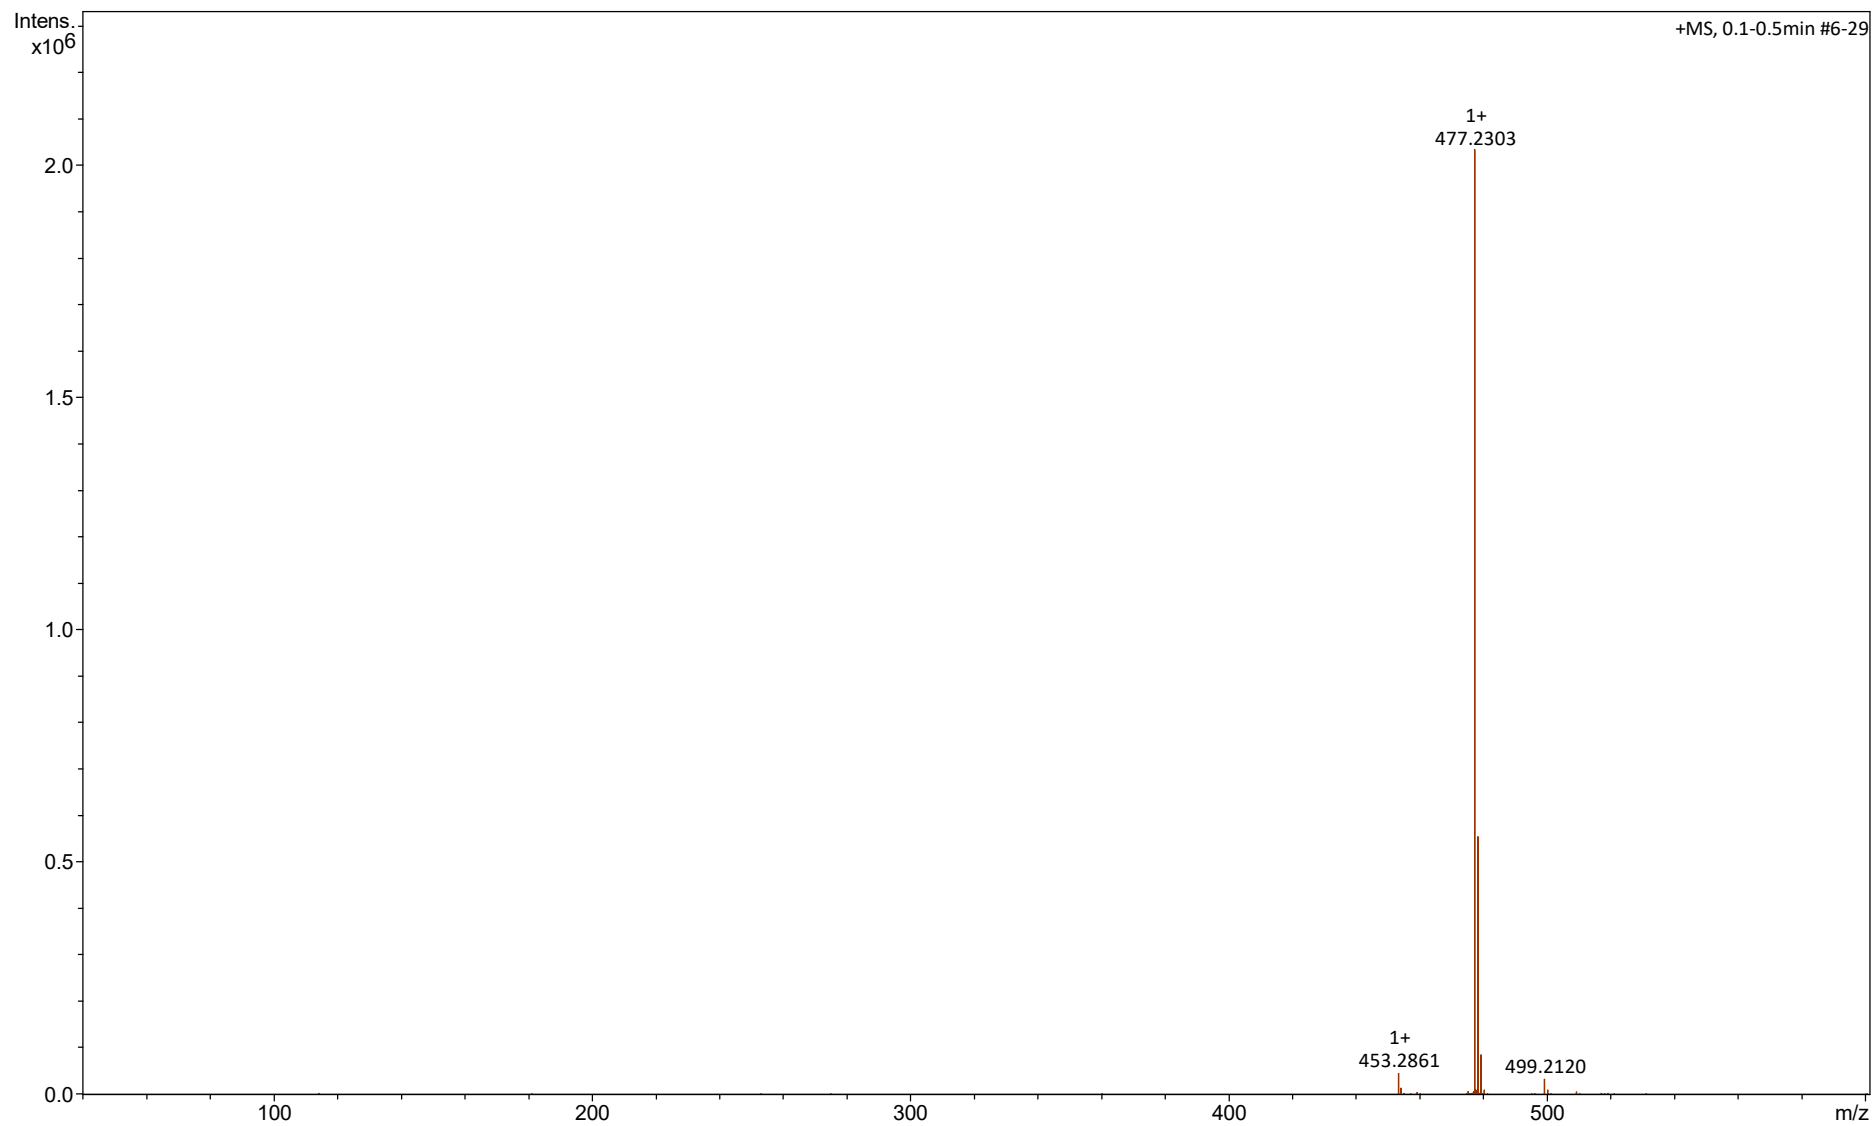

3 d

## Window Display Report

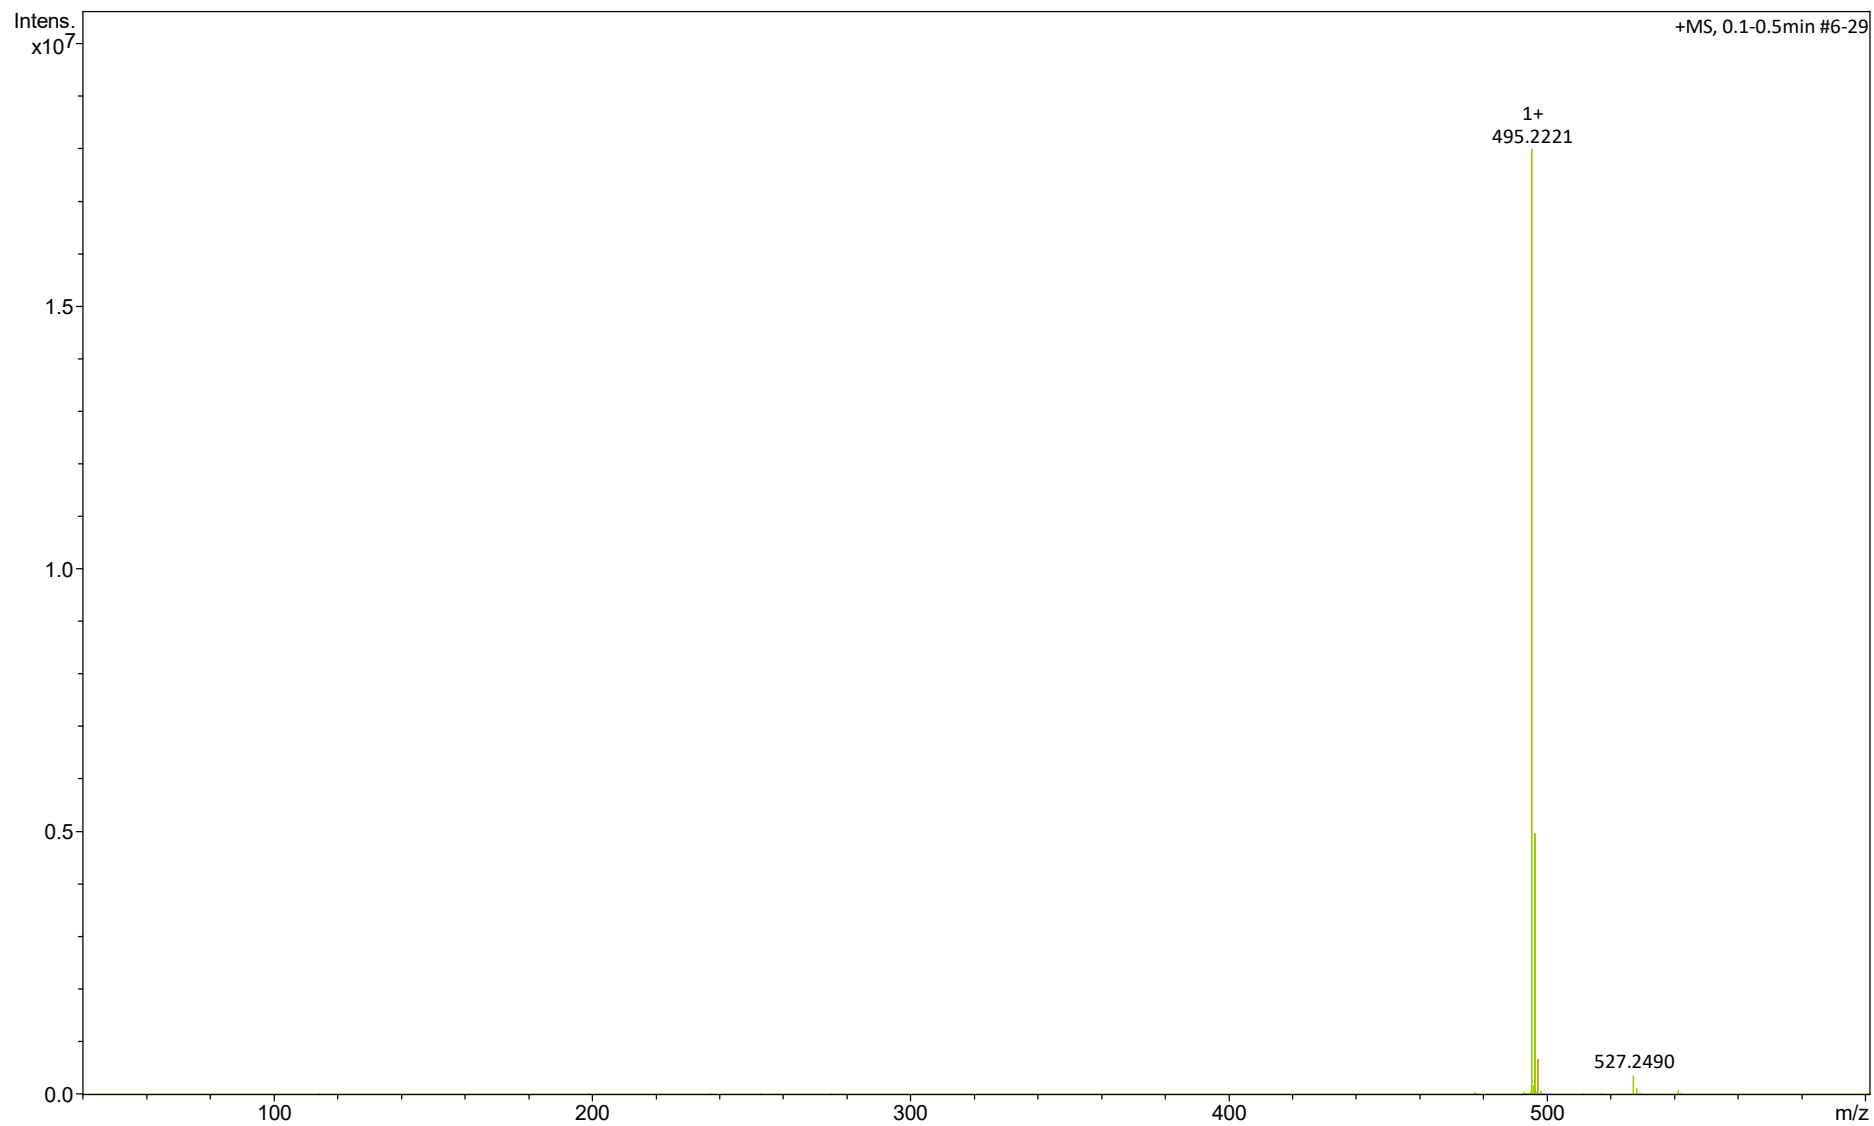

3 e

## Window Display Report

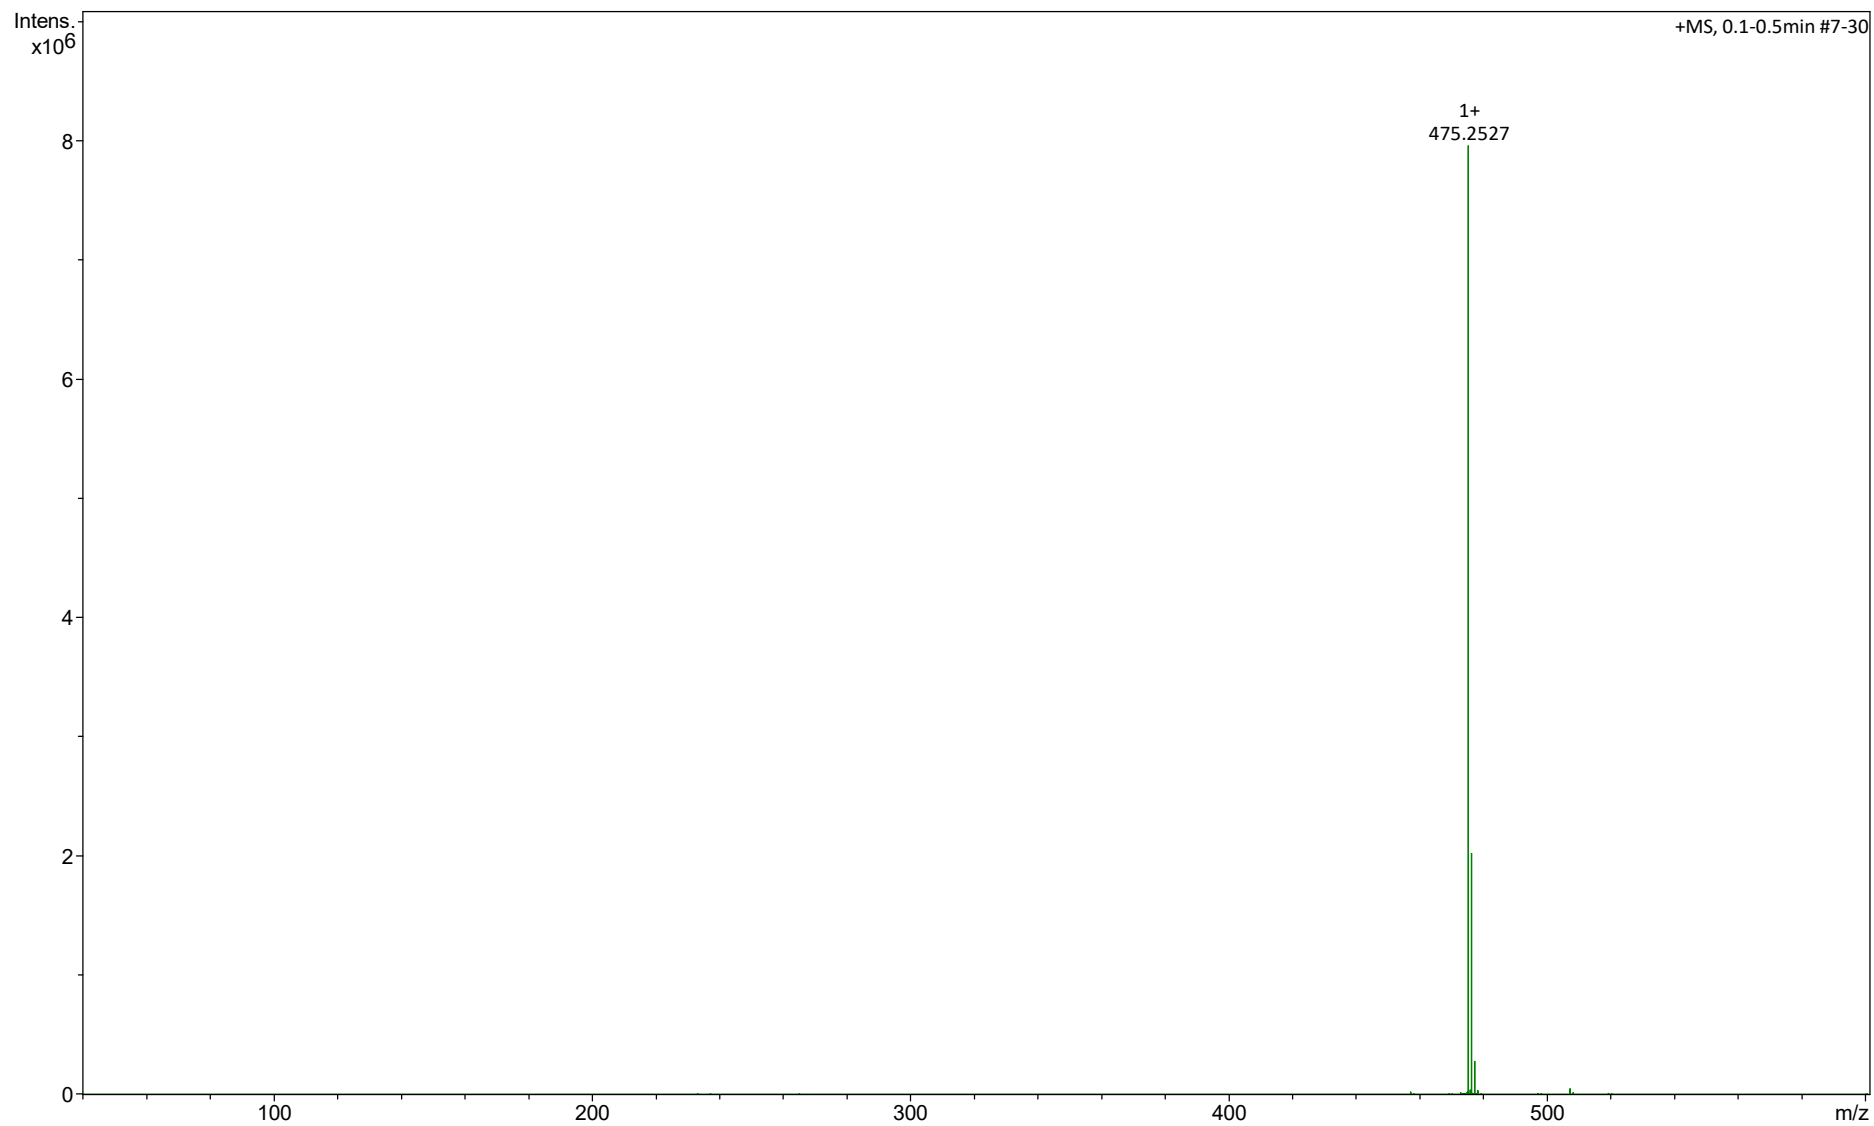

3 f

## Window Display Report

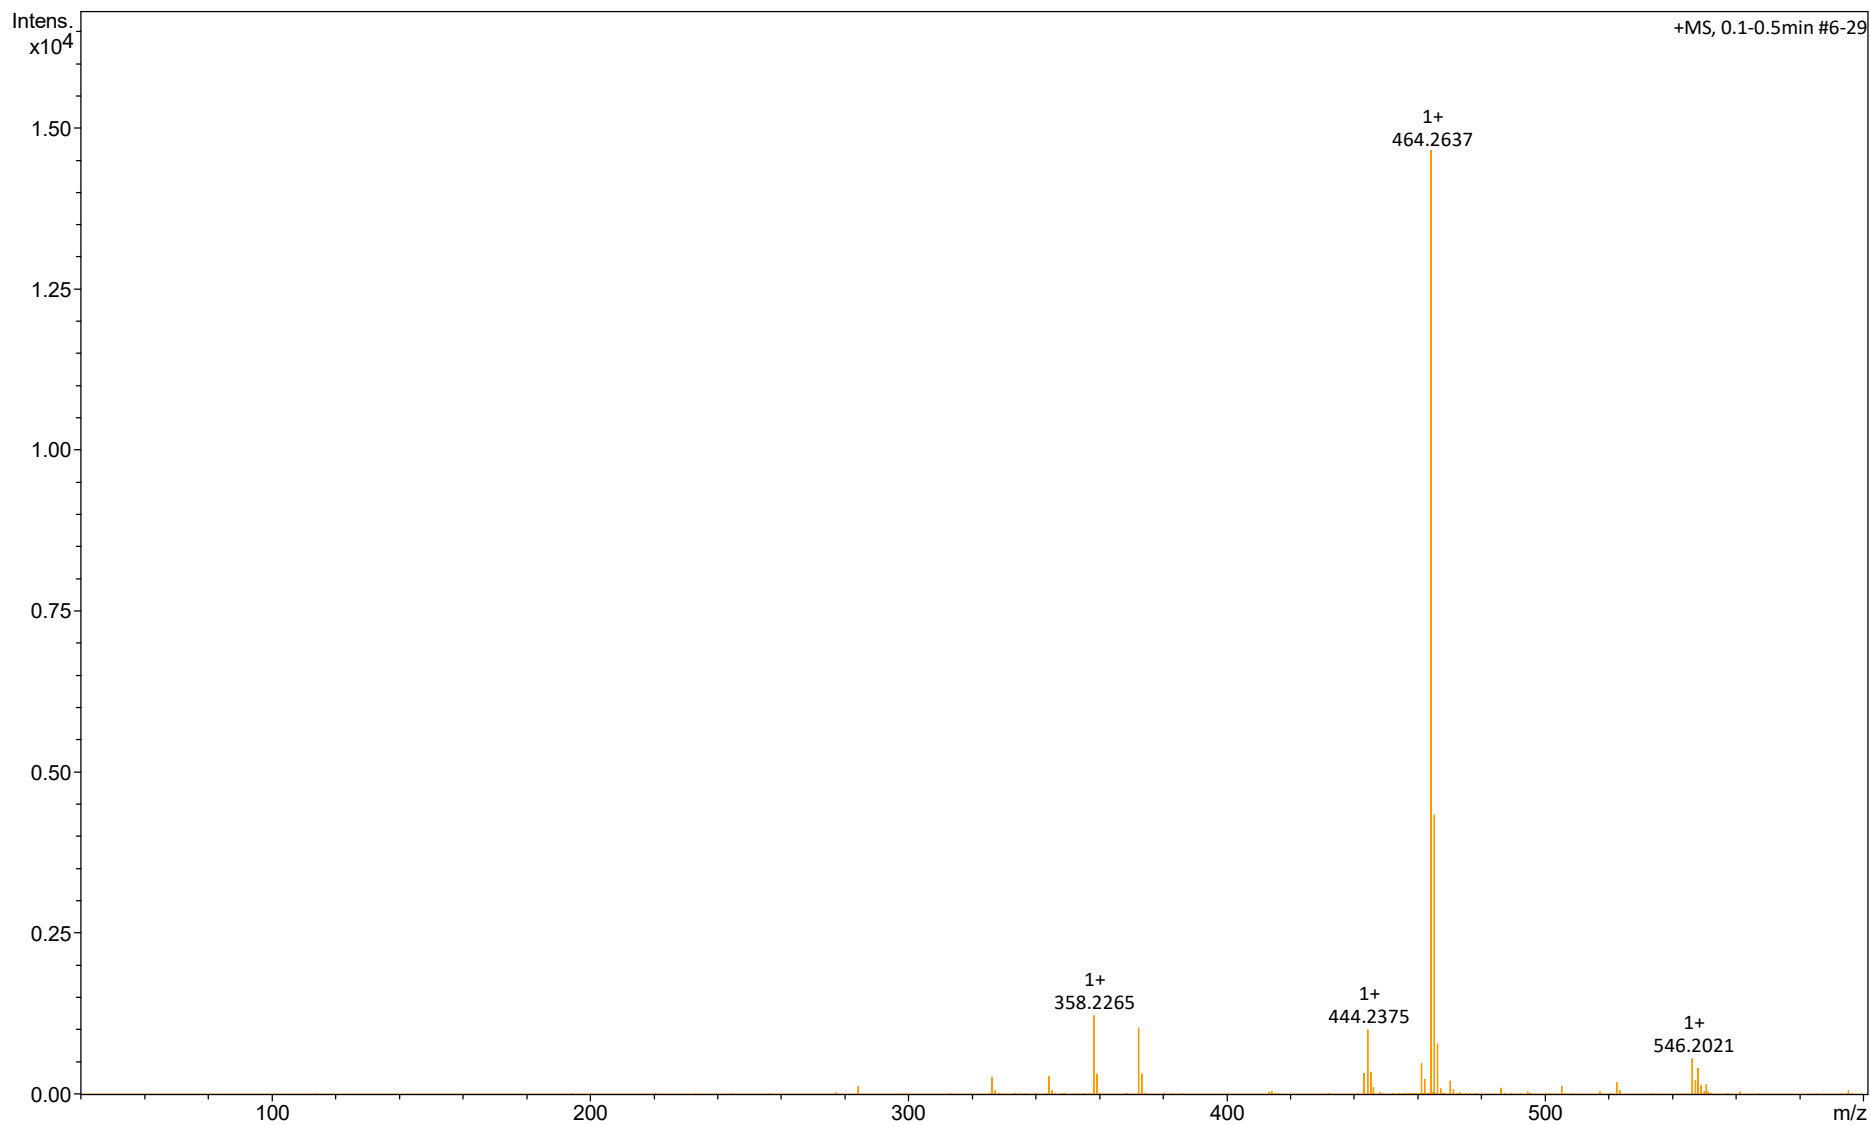

3 g

## Window Display Report

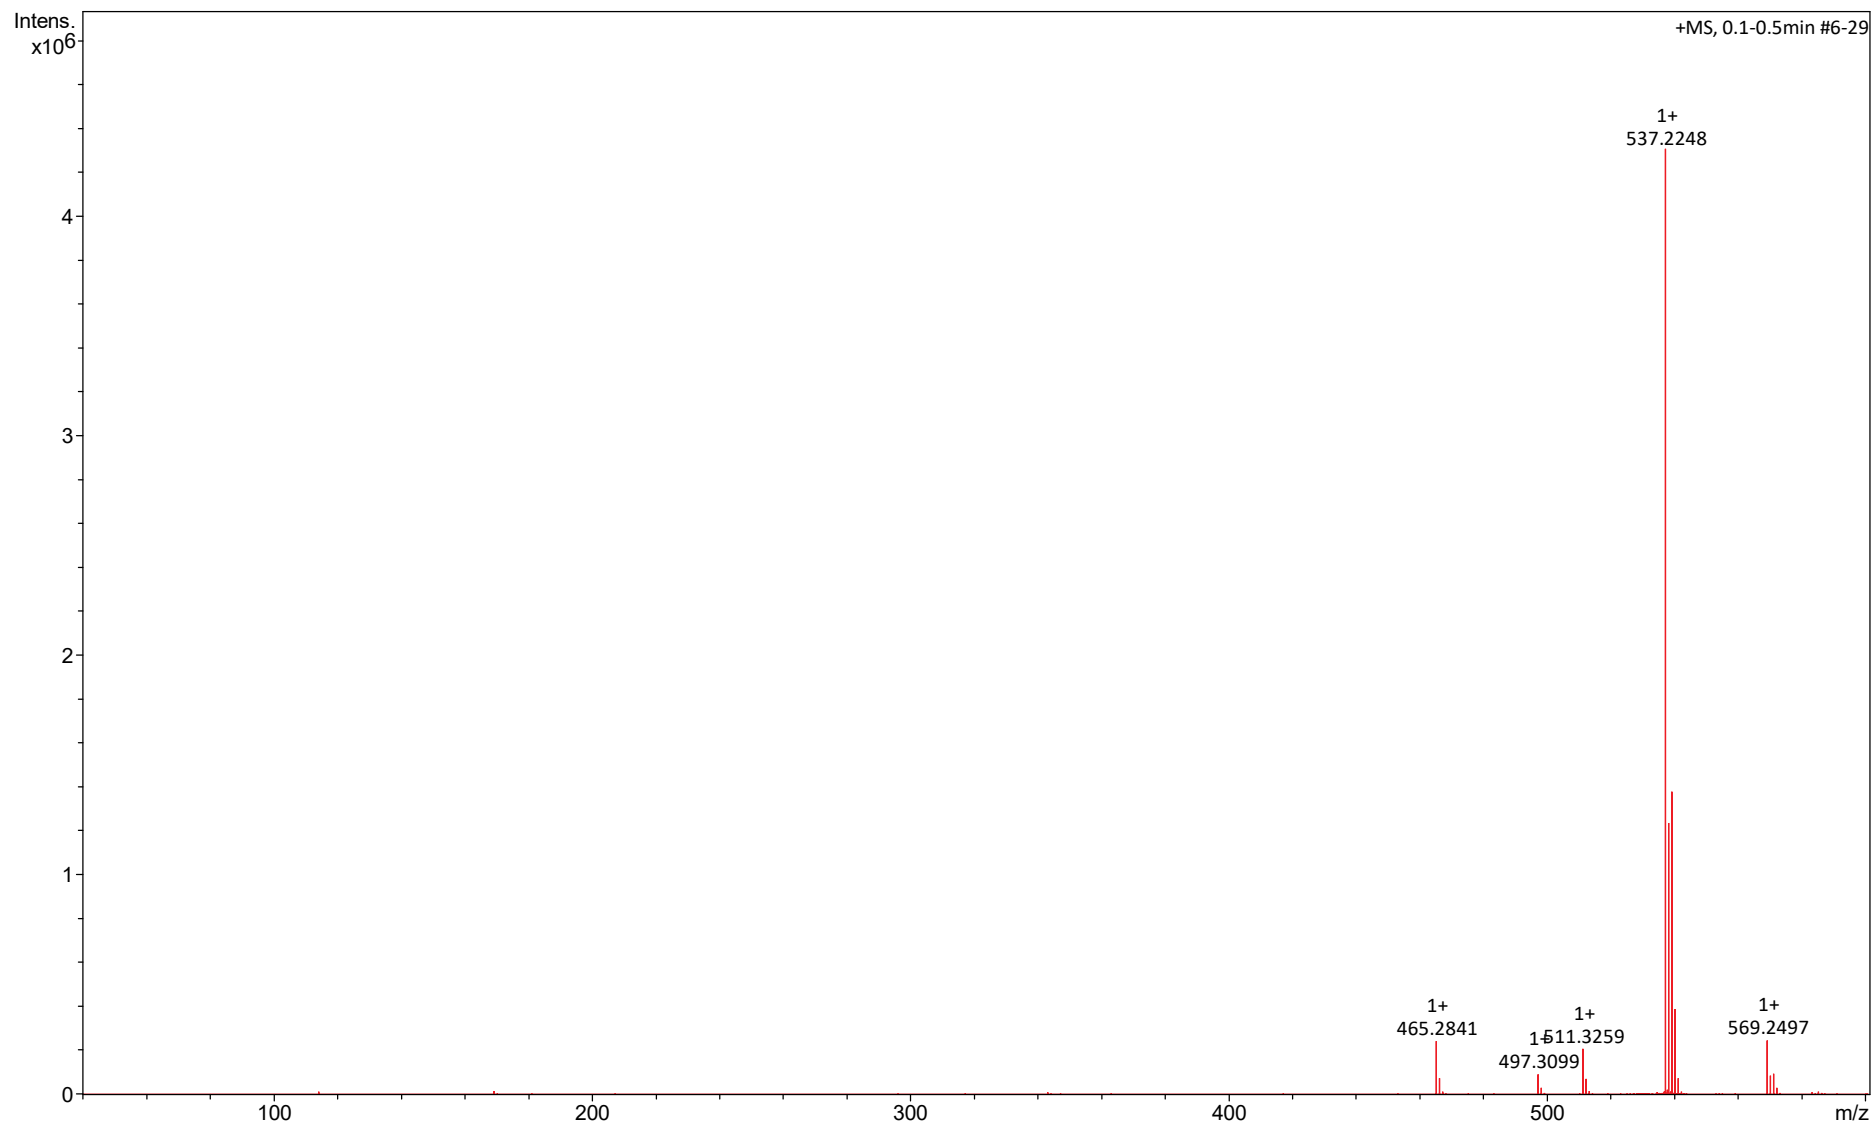

Window Display Report

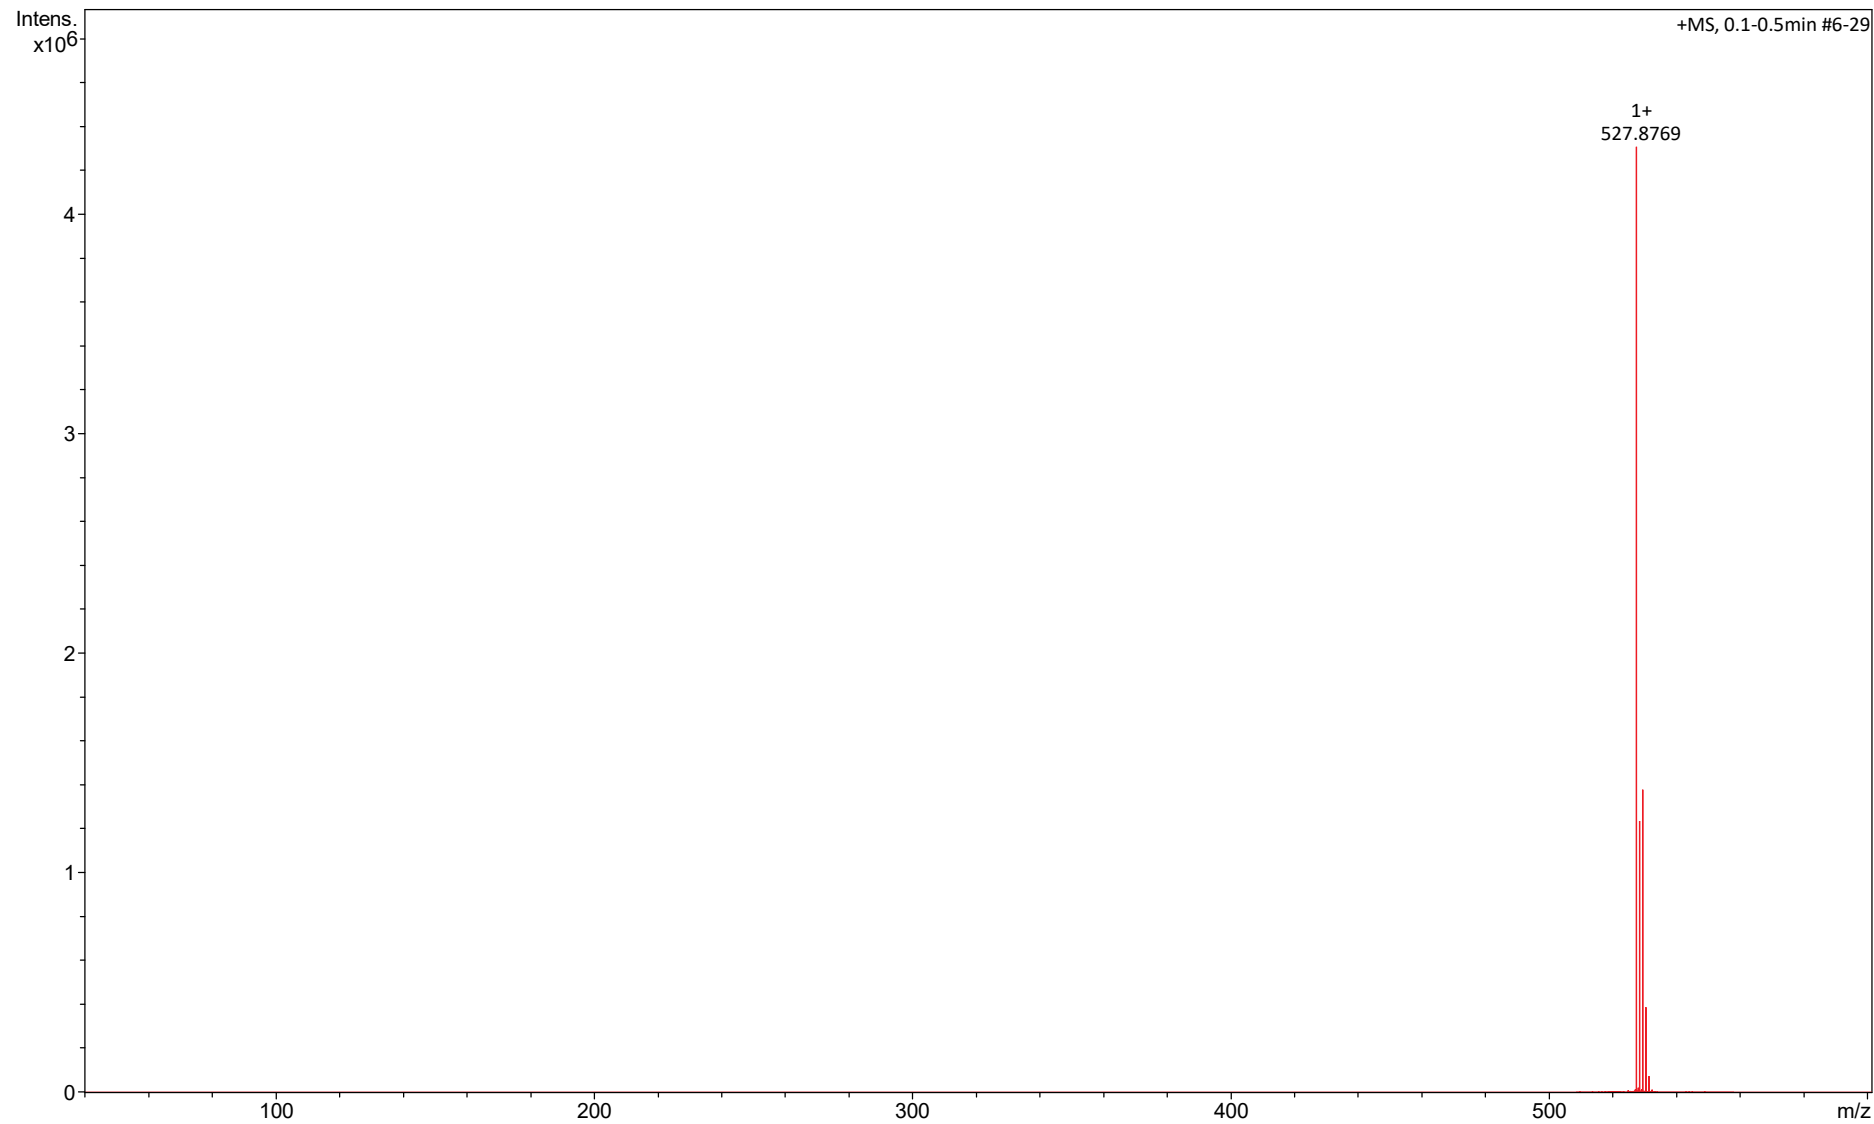

## Window Display Report

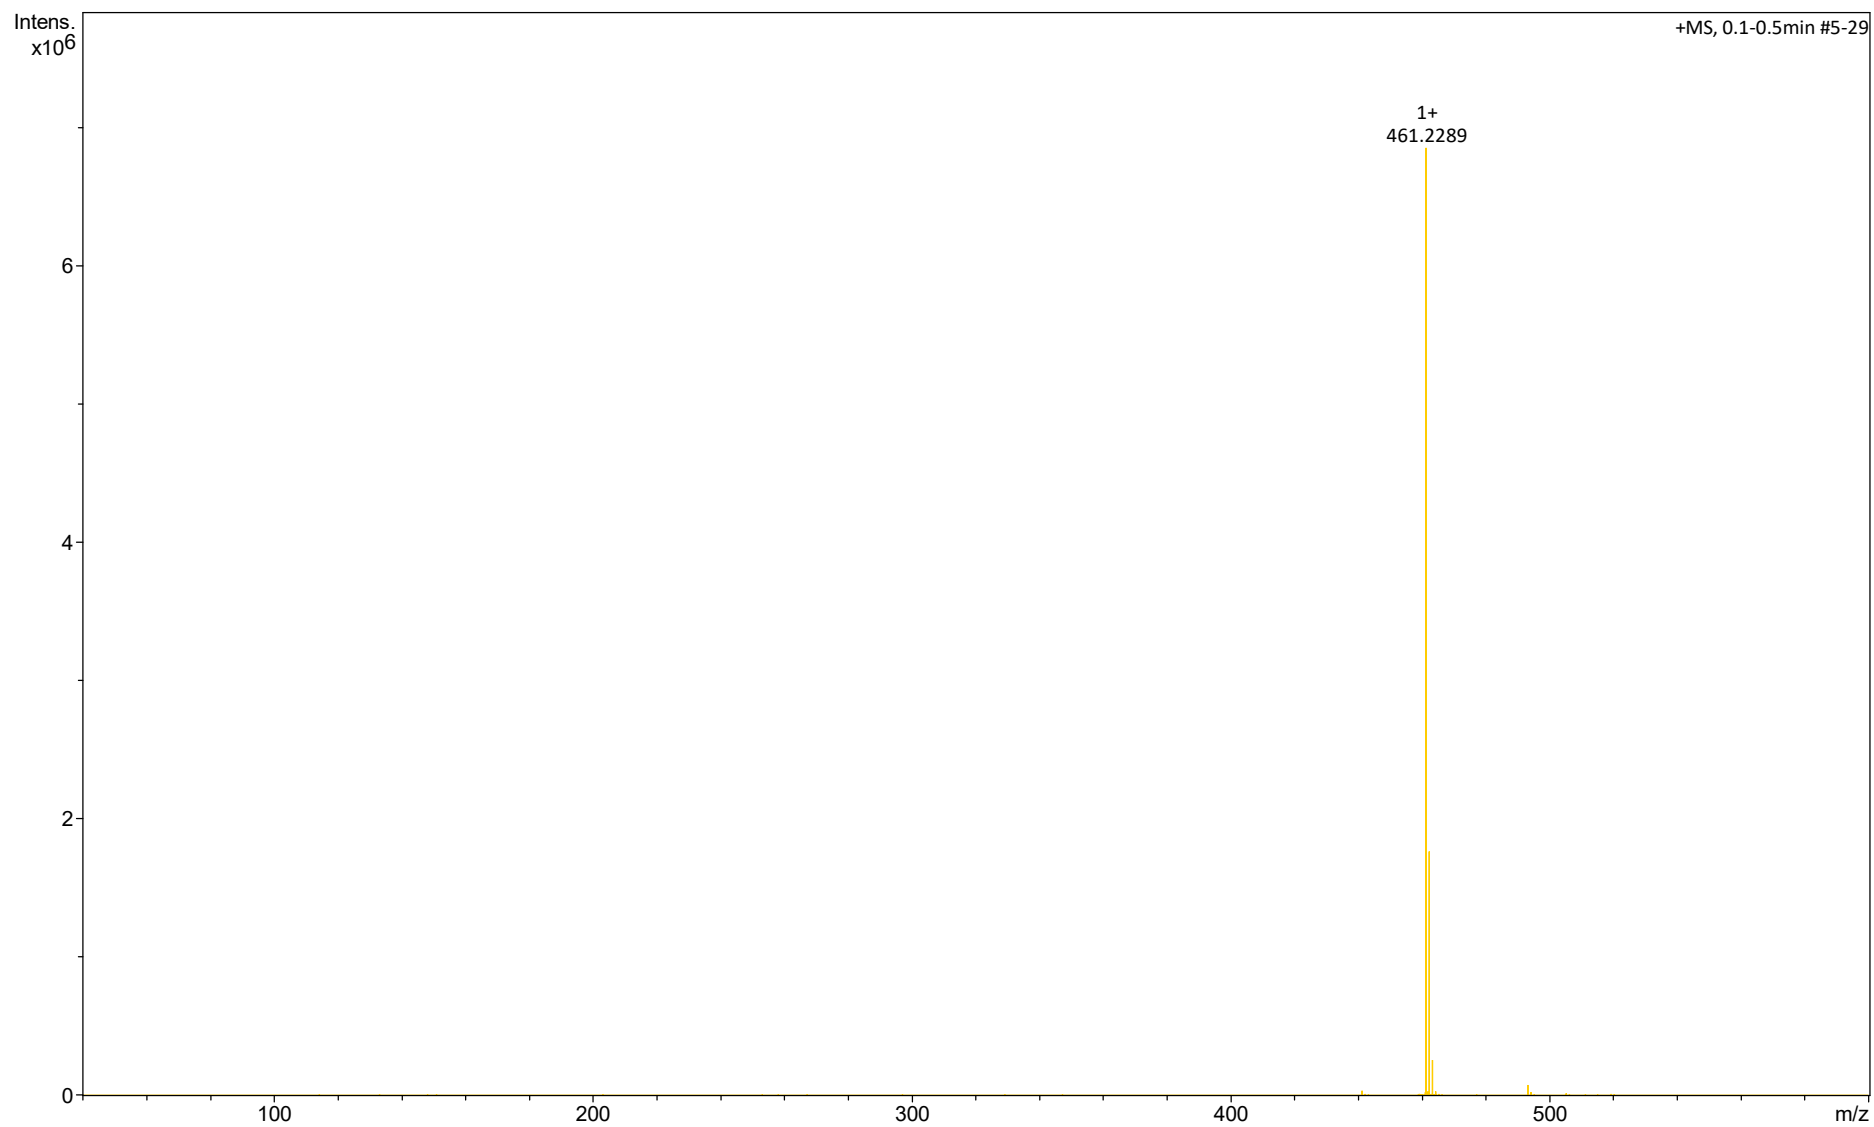

## Window Display Report

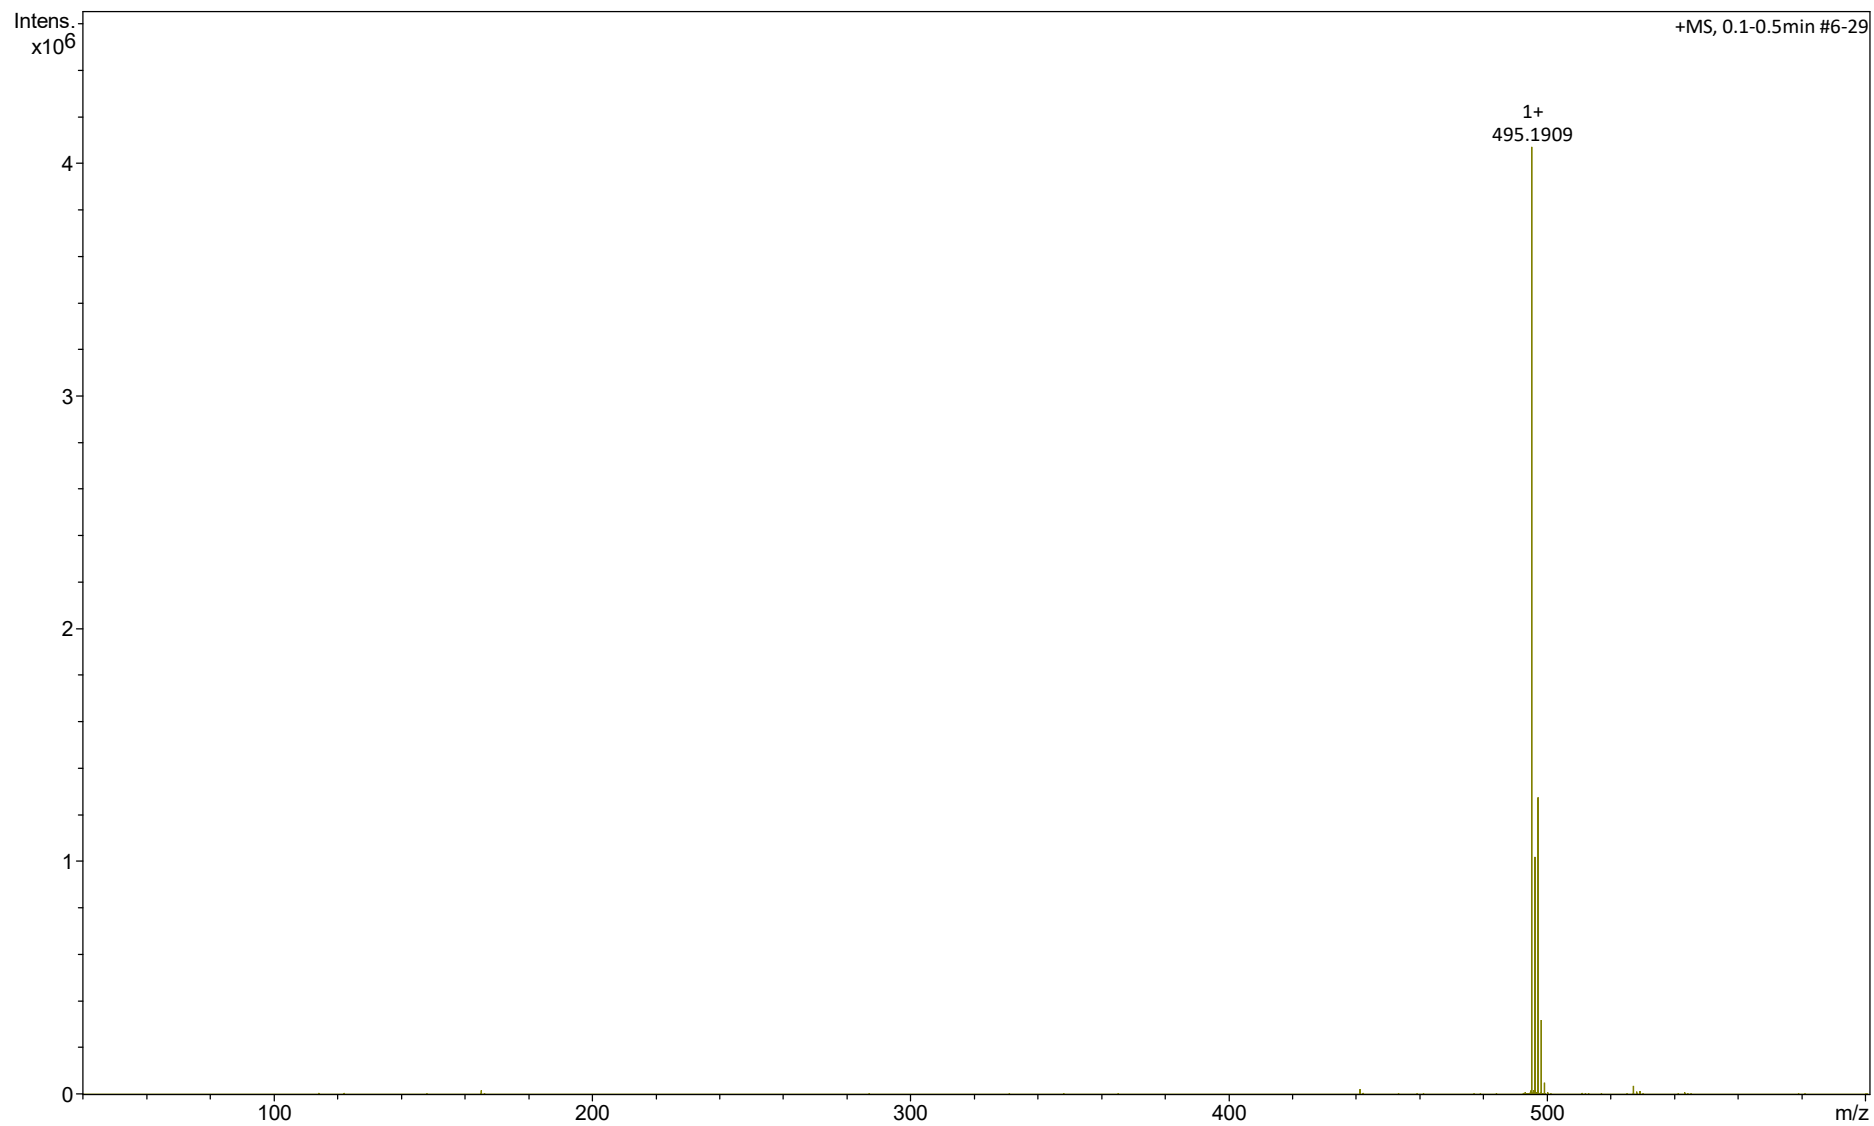



3 k

## Window Display Report

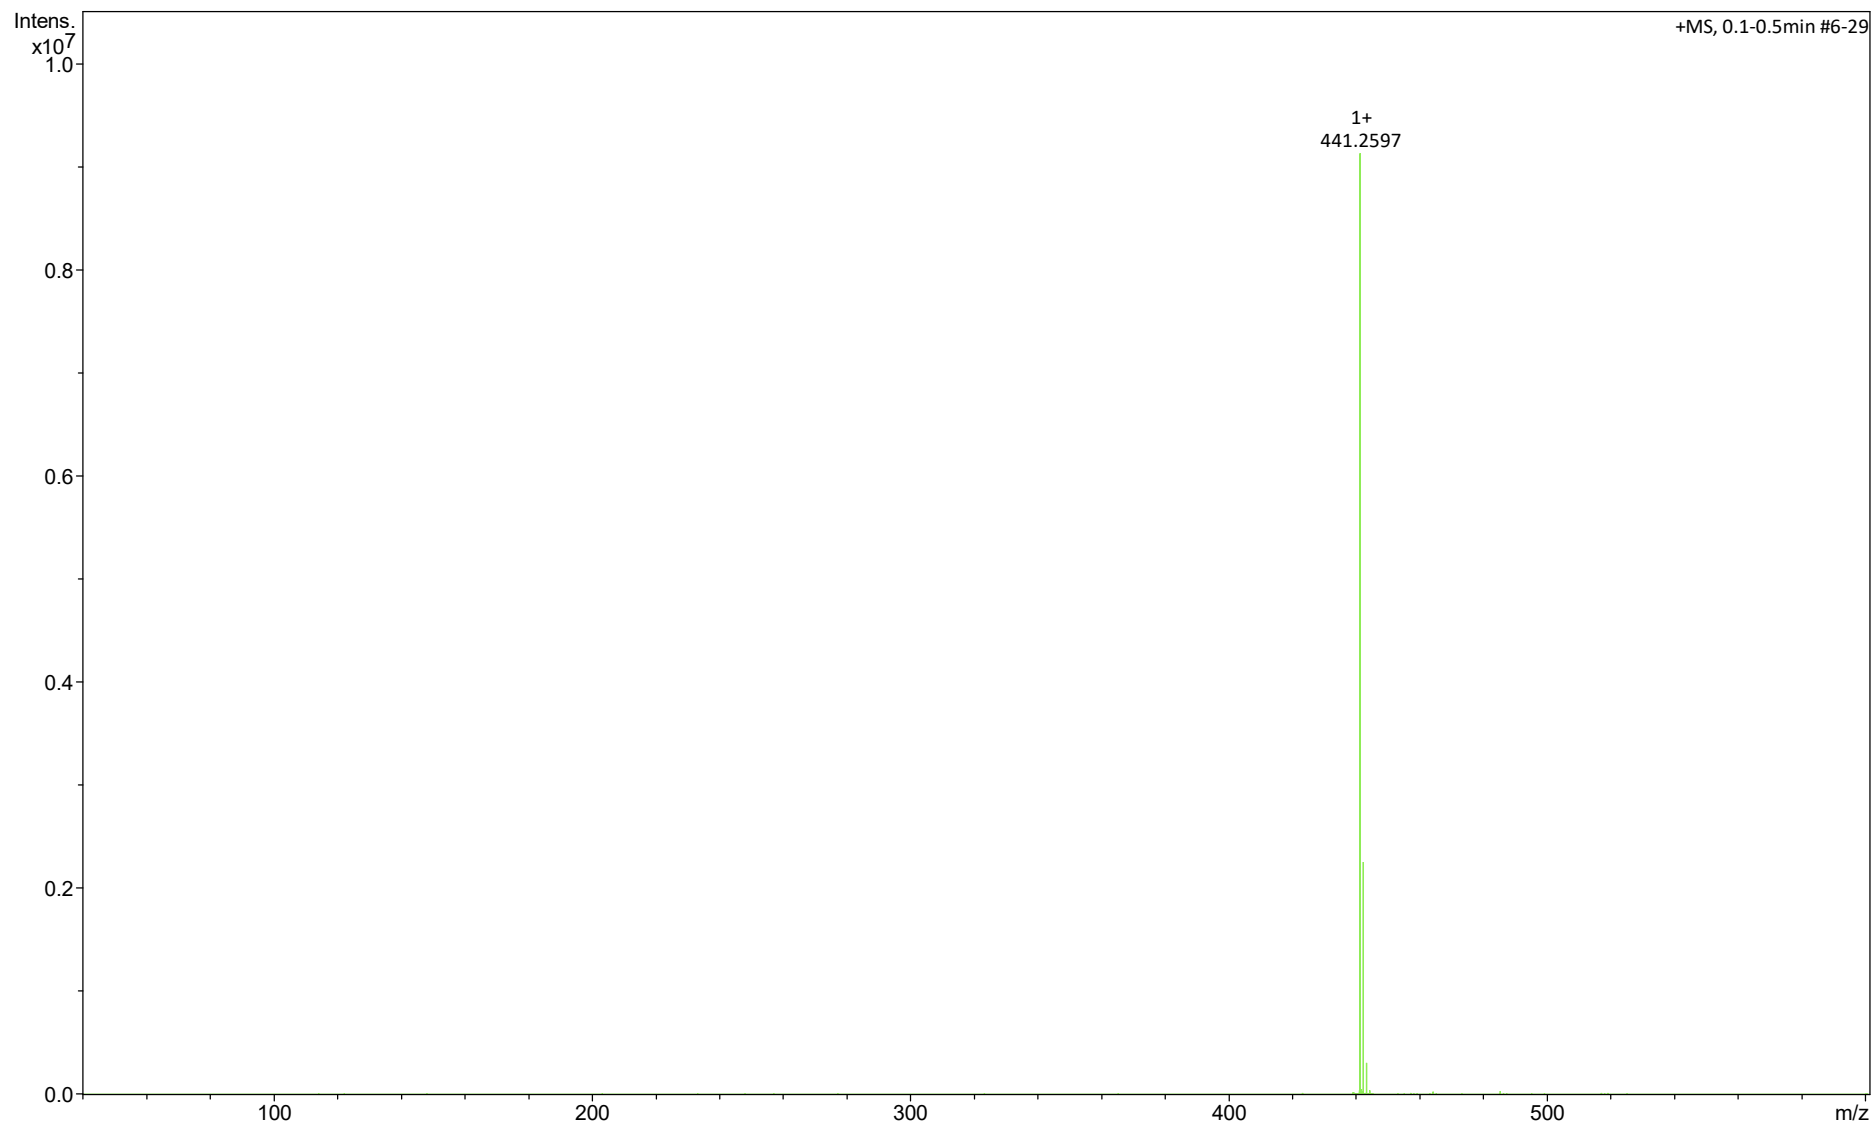

## Window Display Report

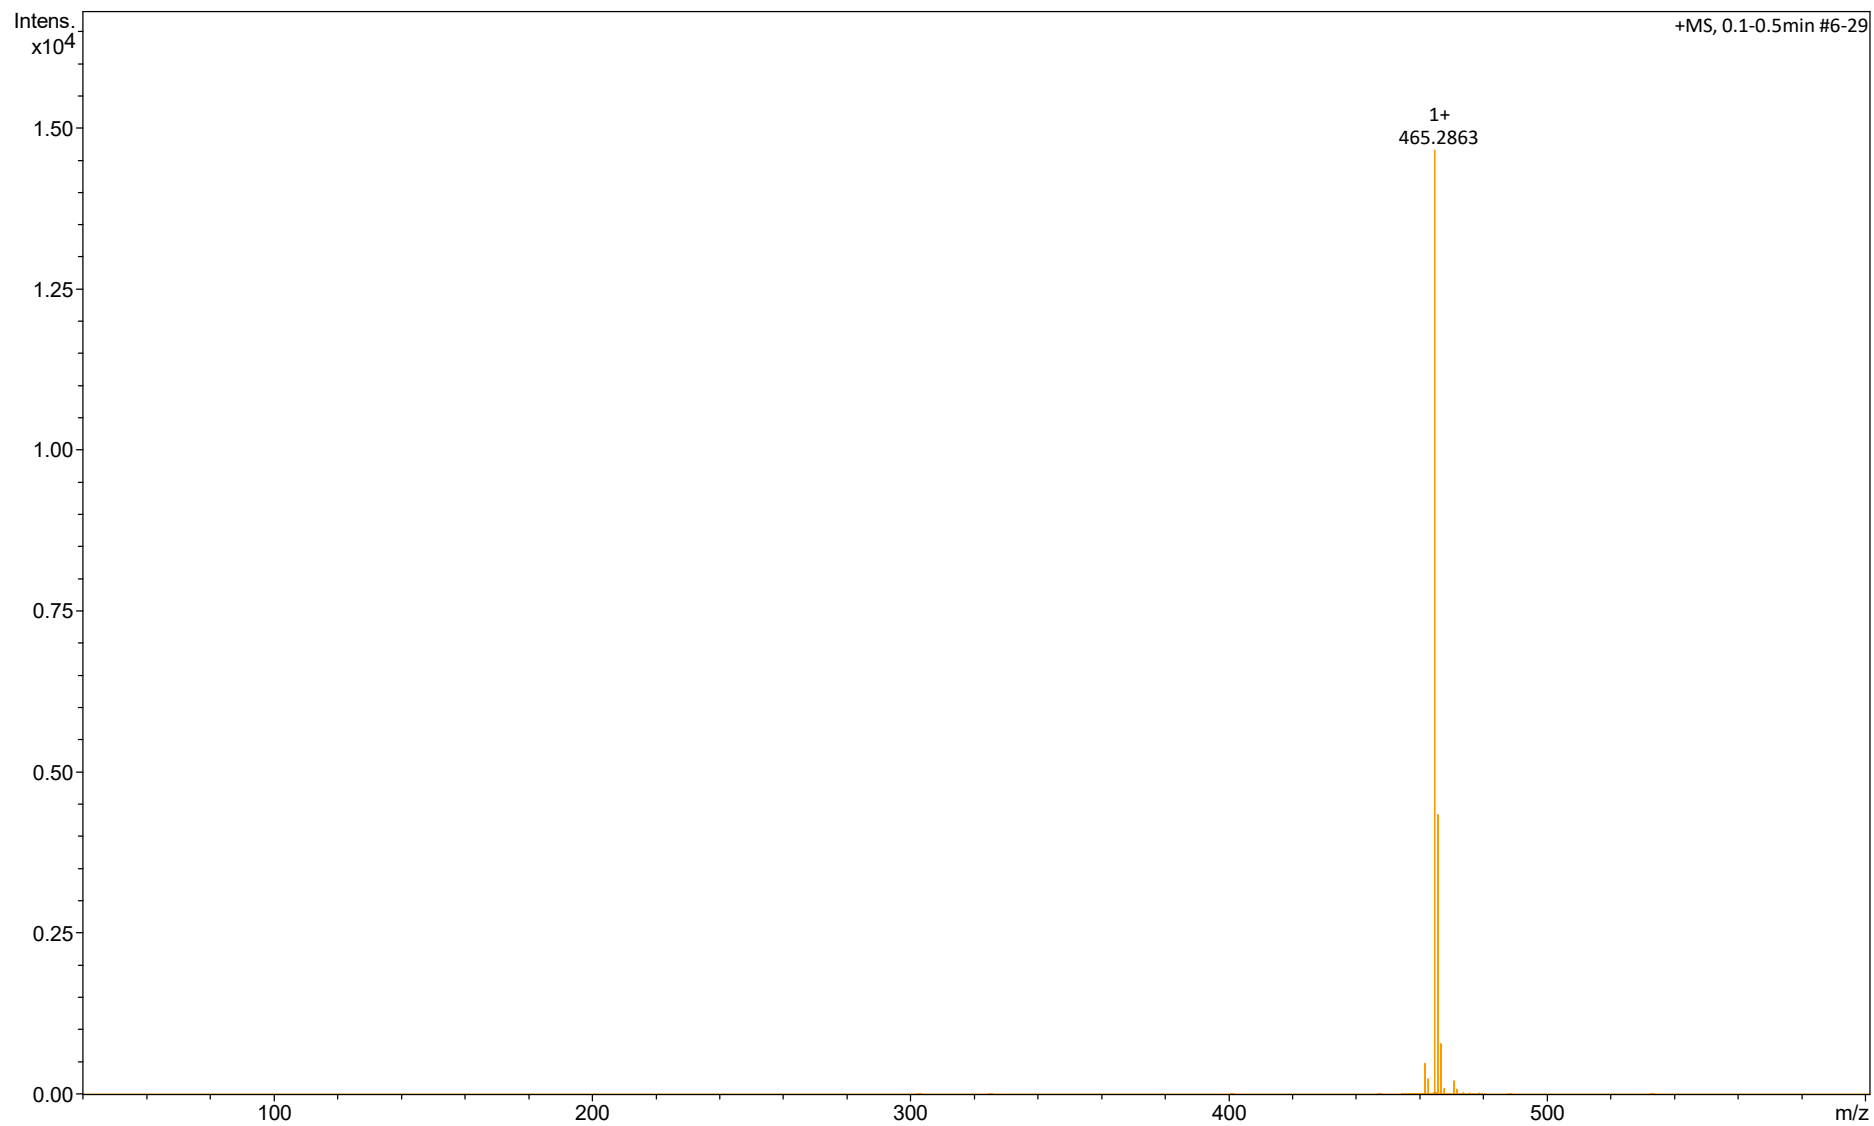

3 m

## Window Display Report

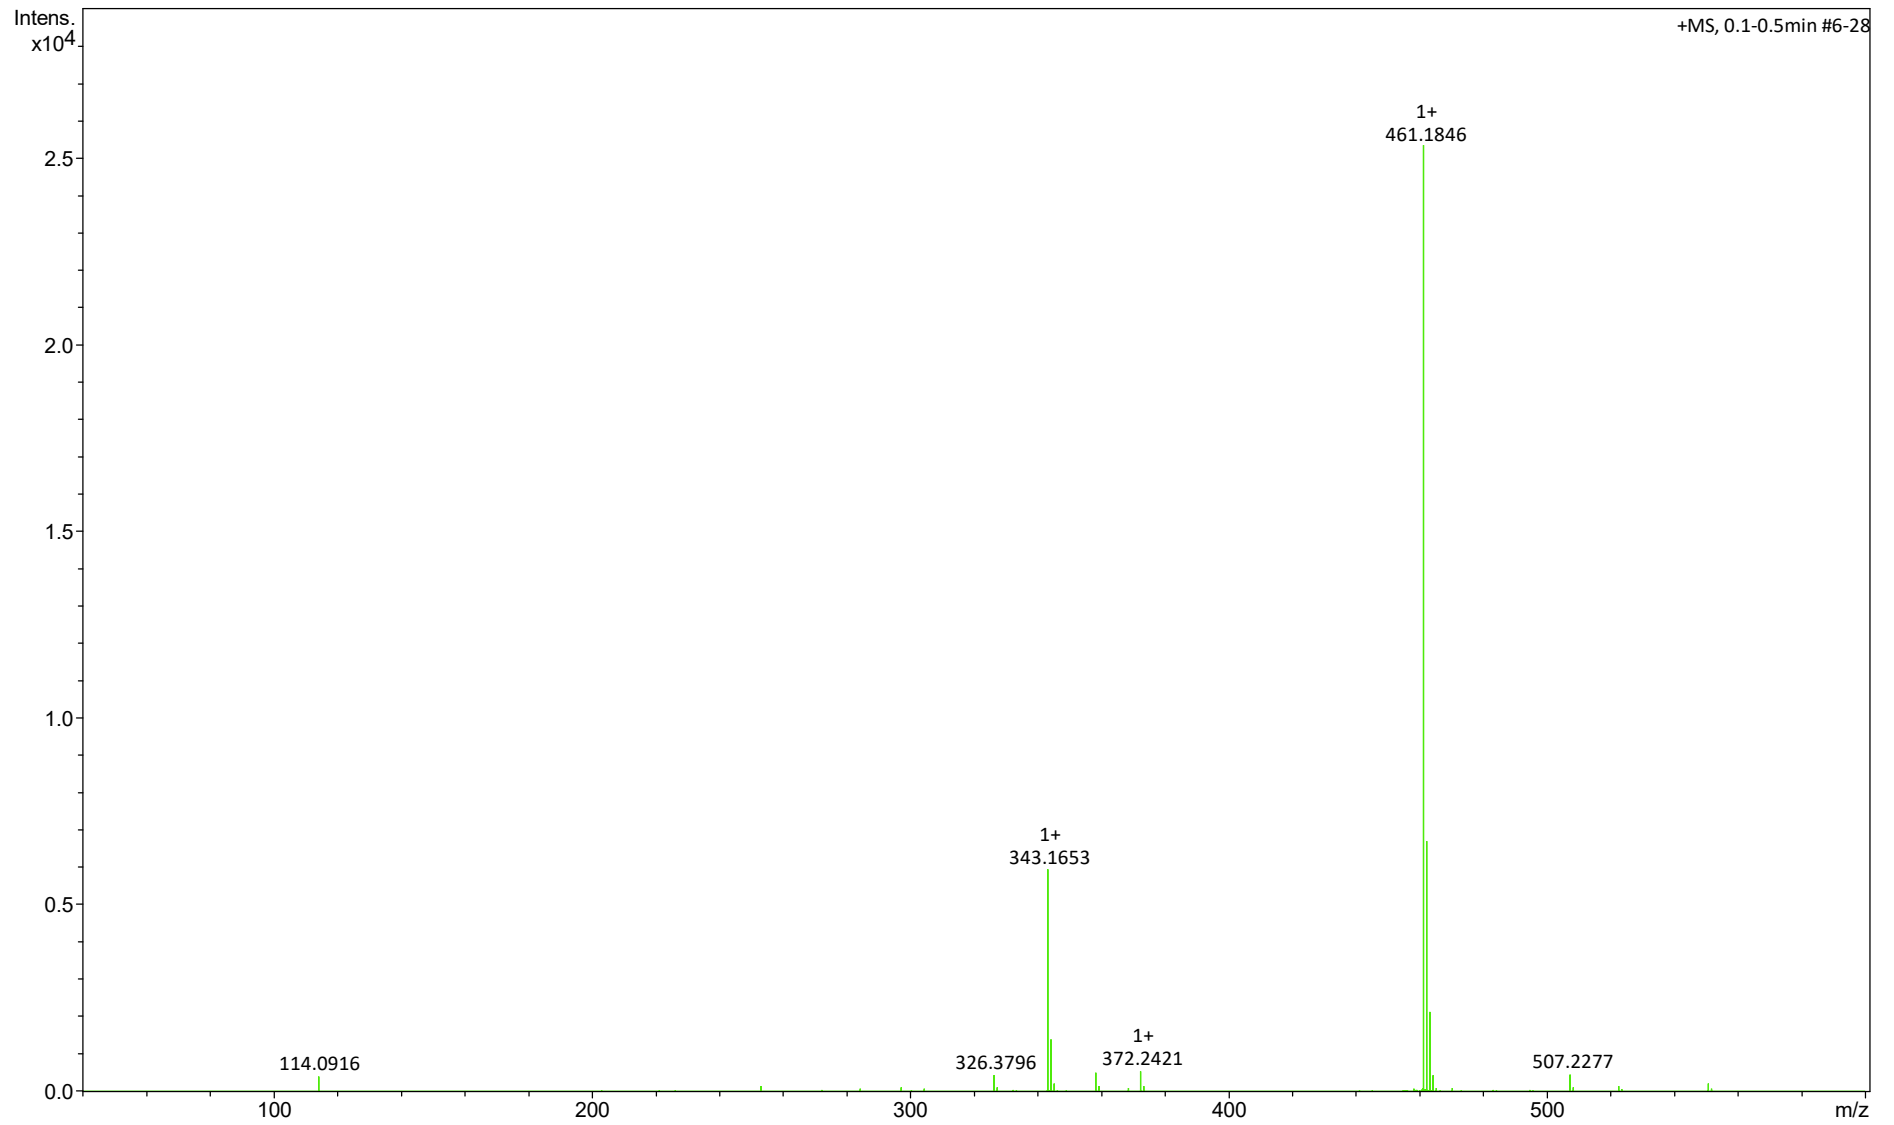

3 n

## Window Display Report

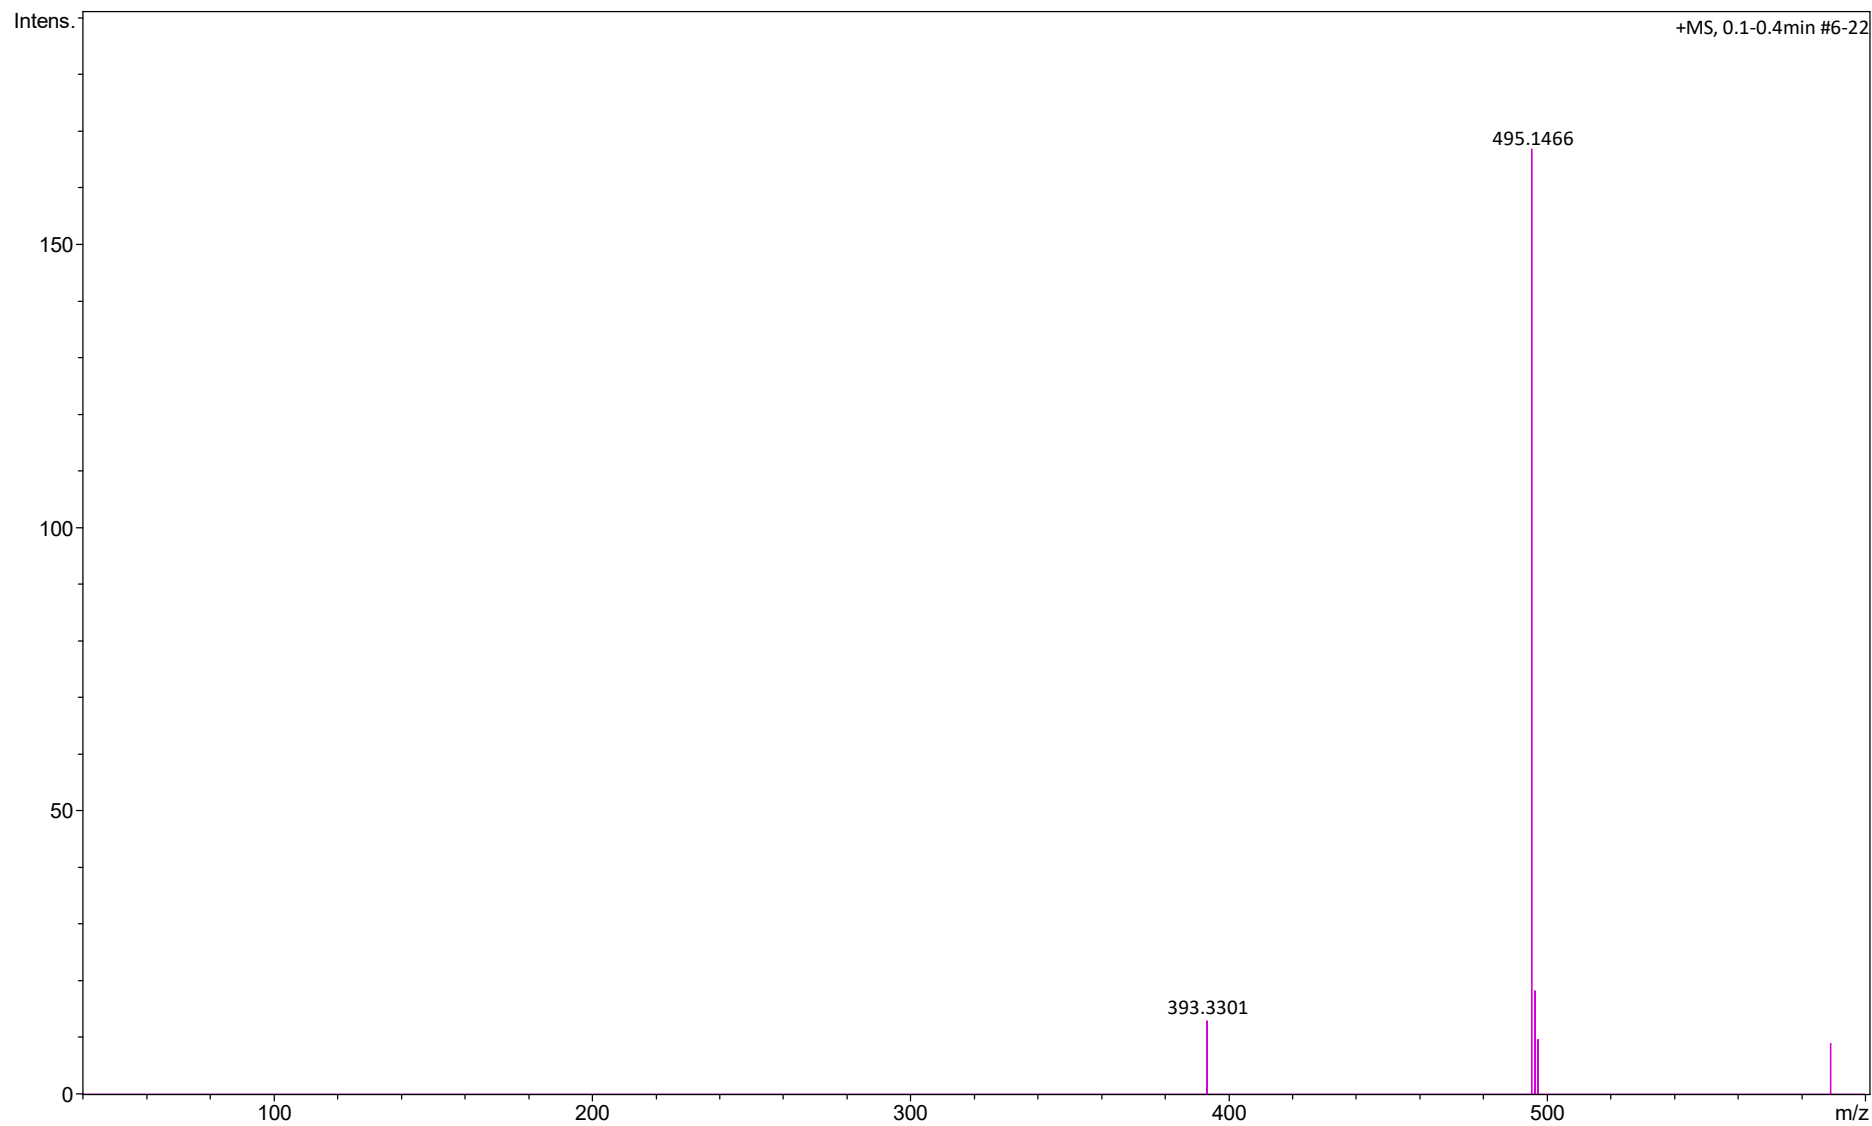

## Window Display Report

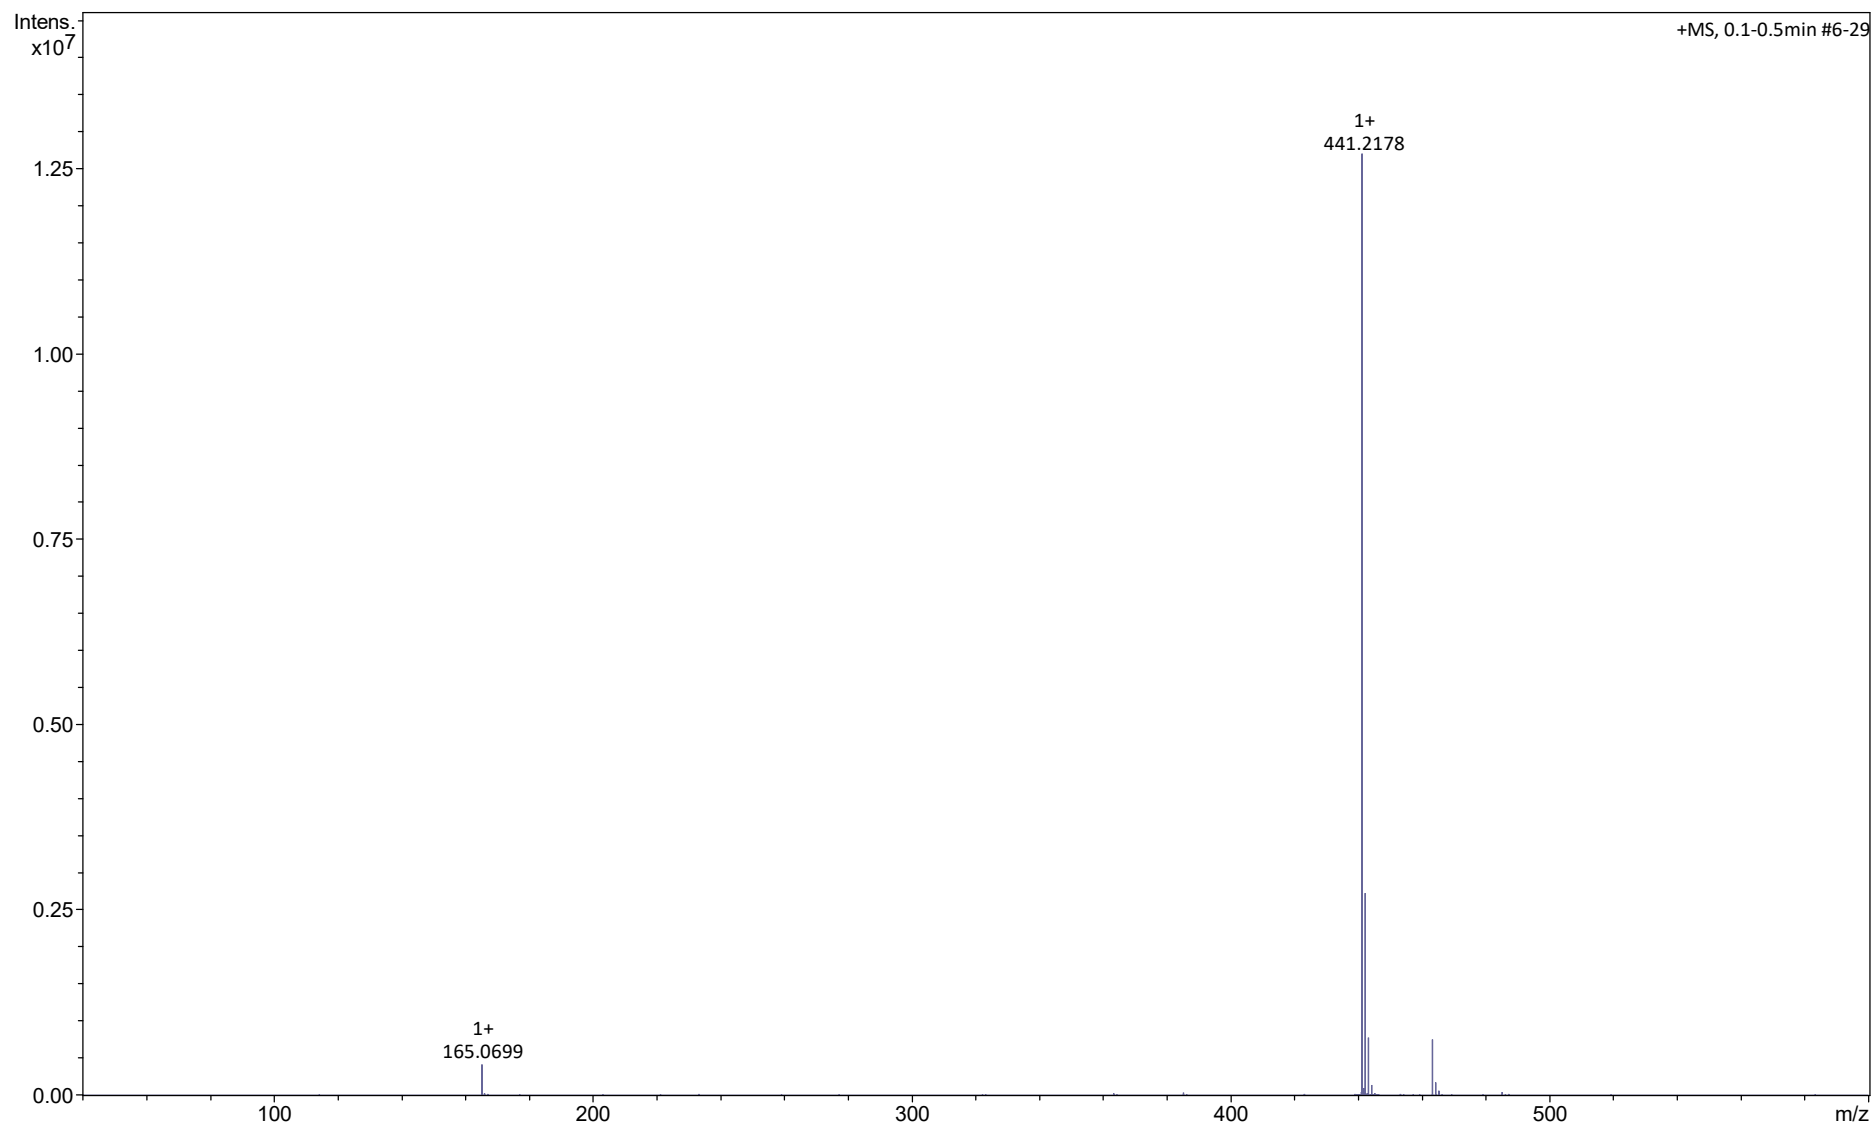

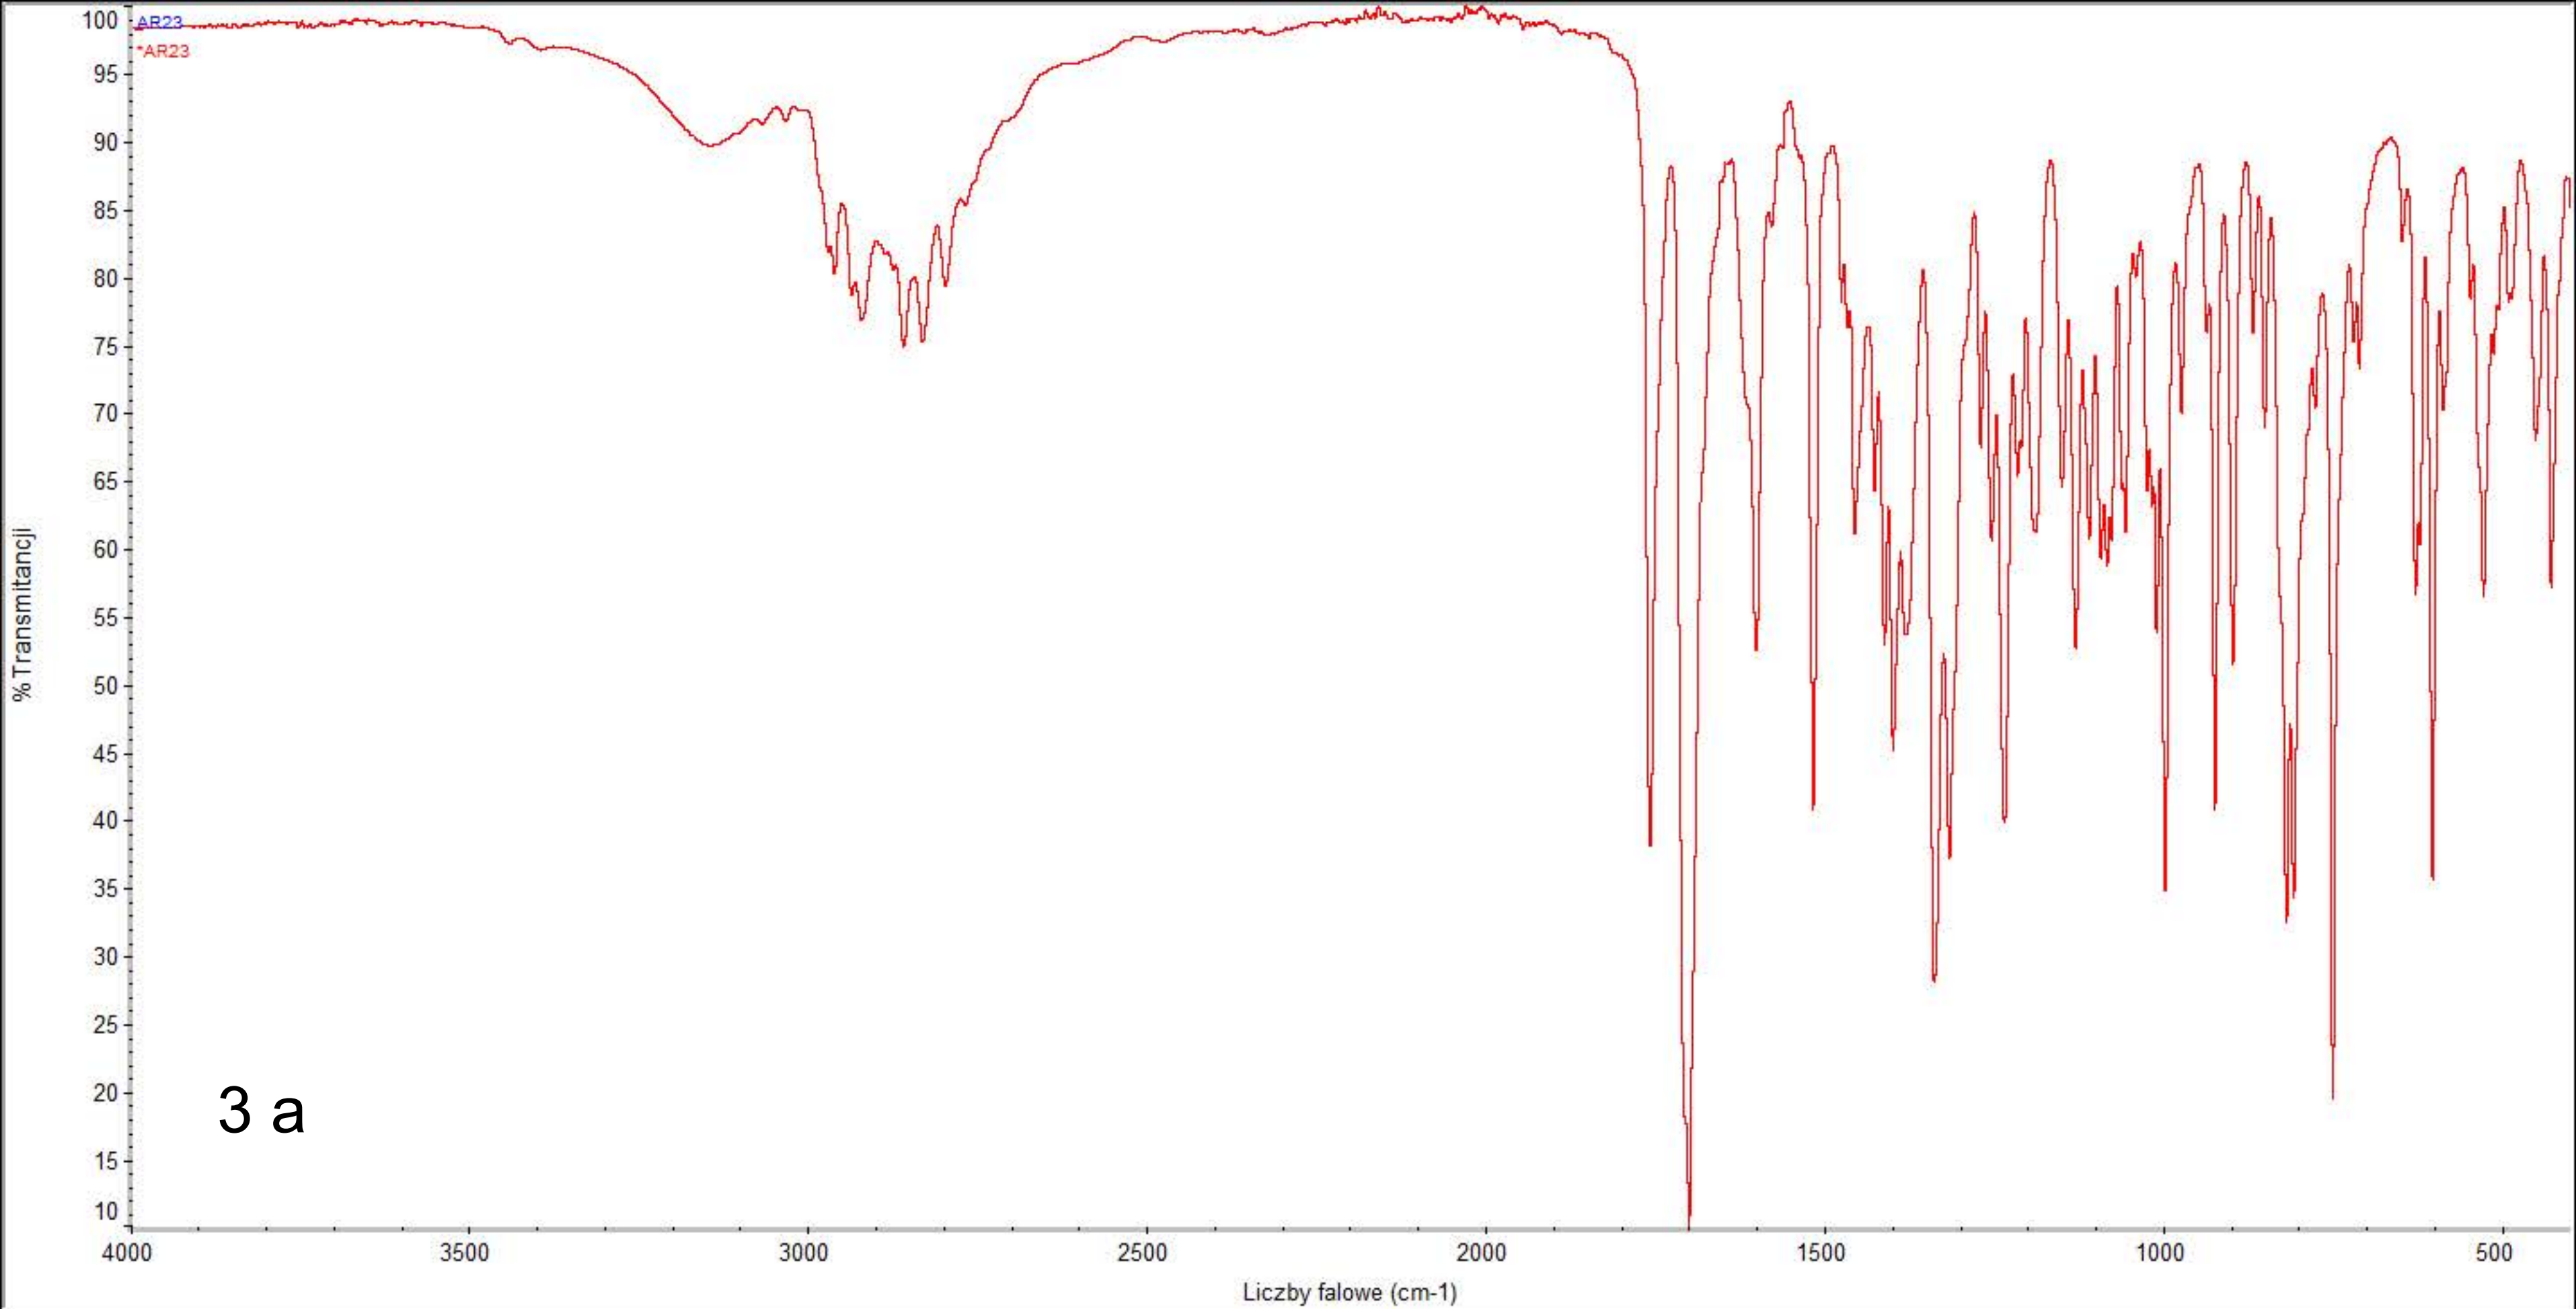

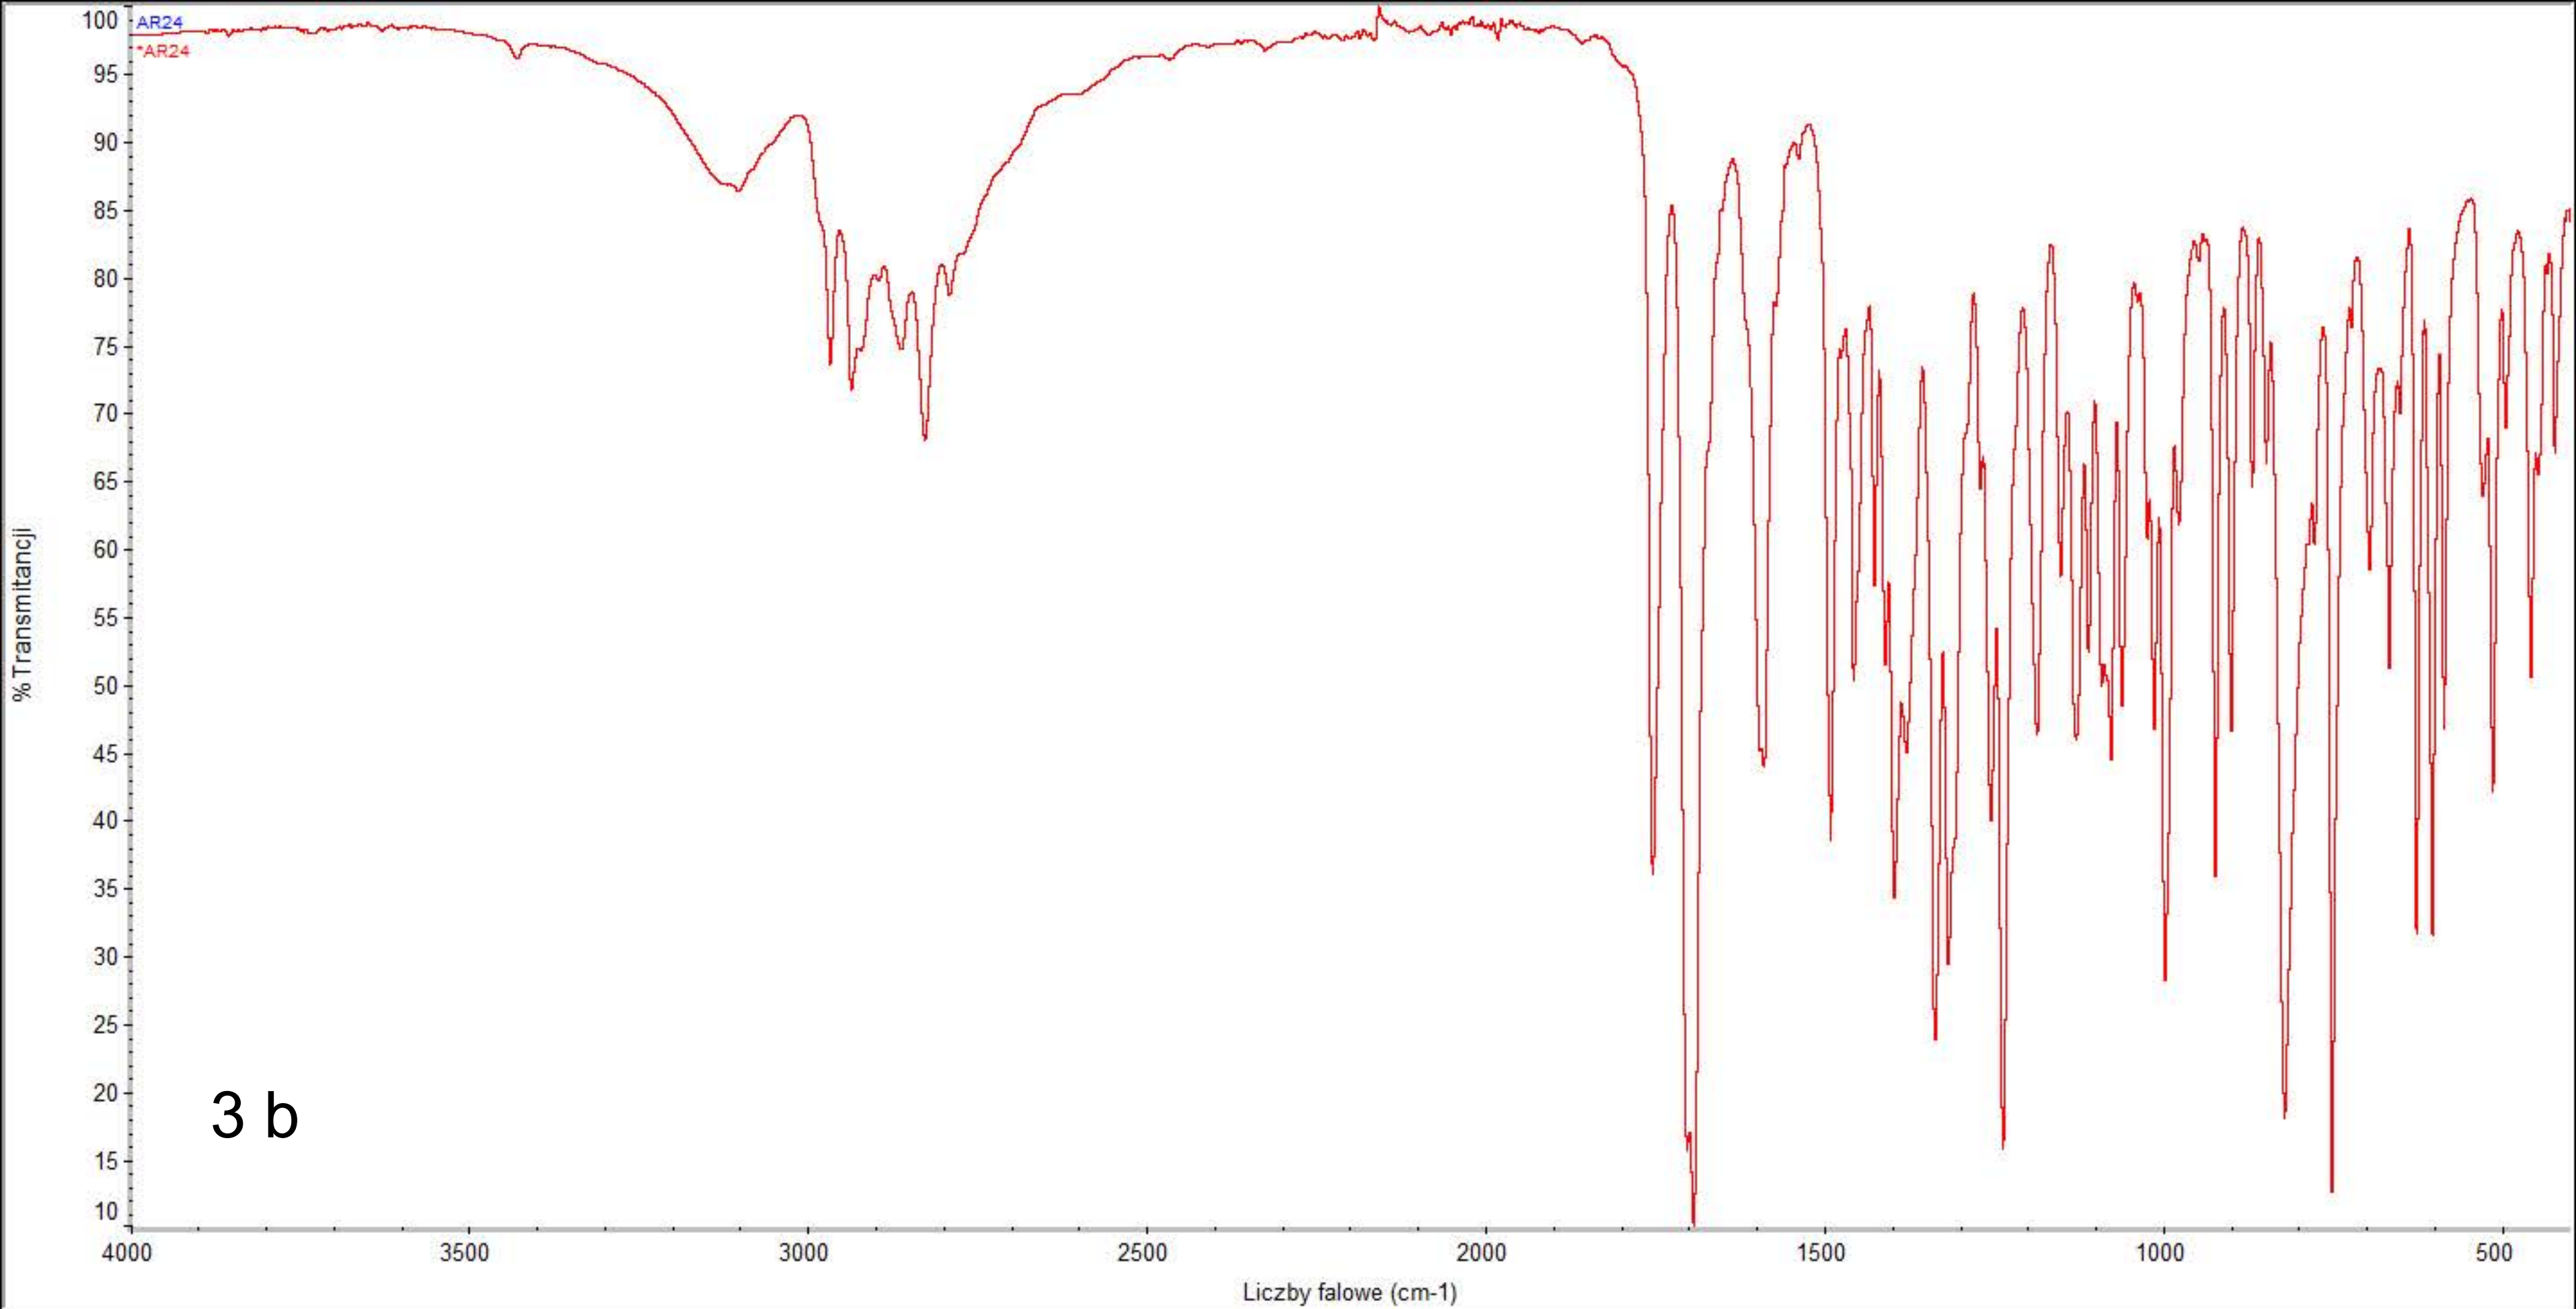

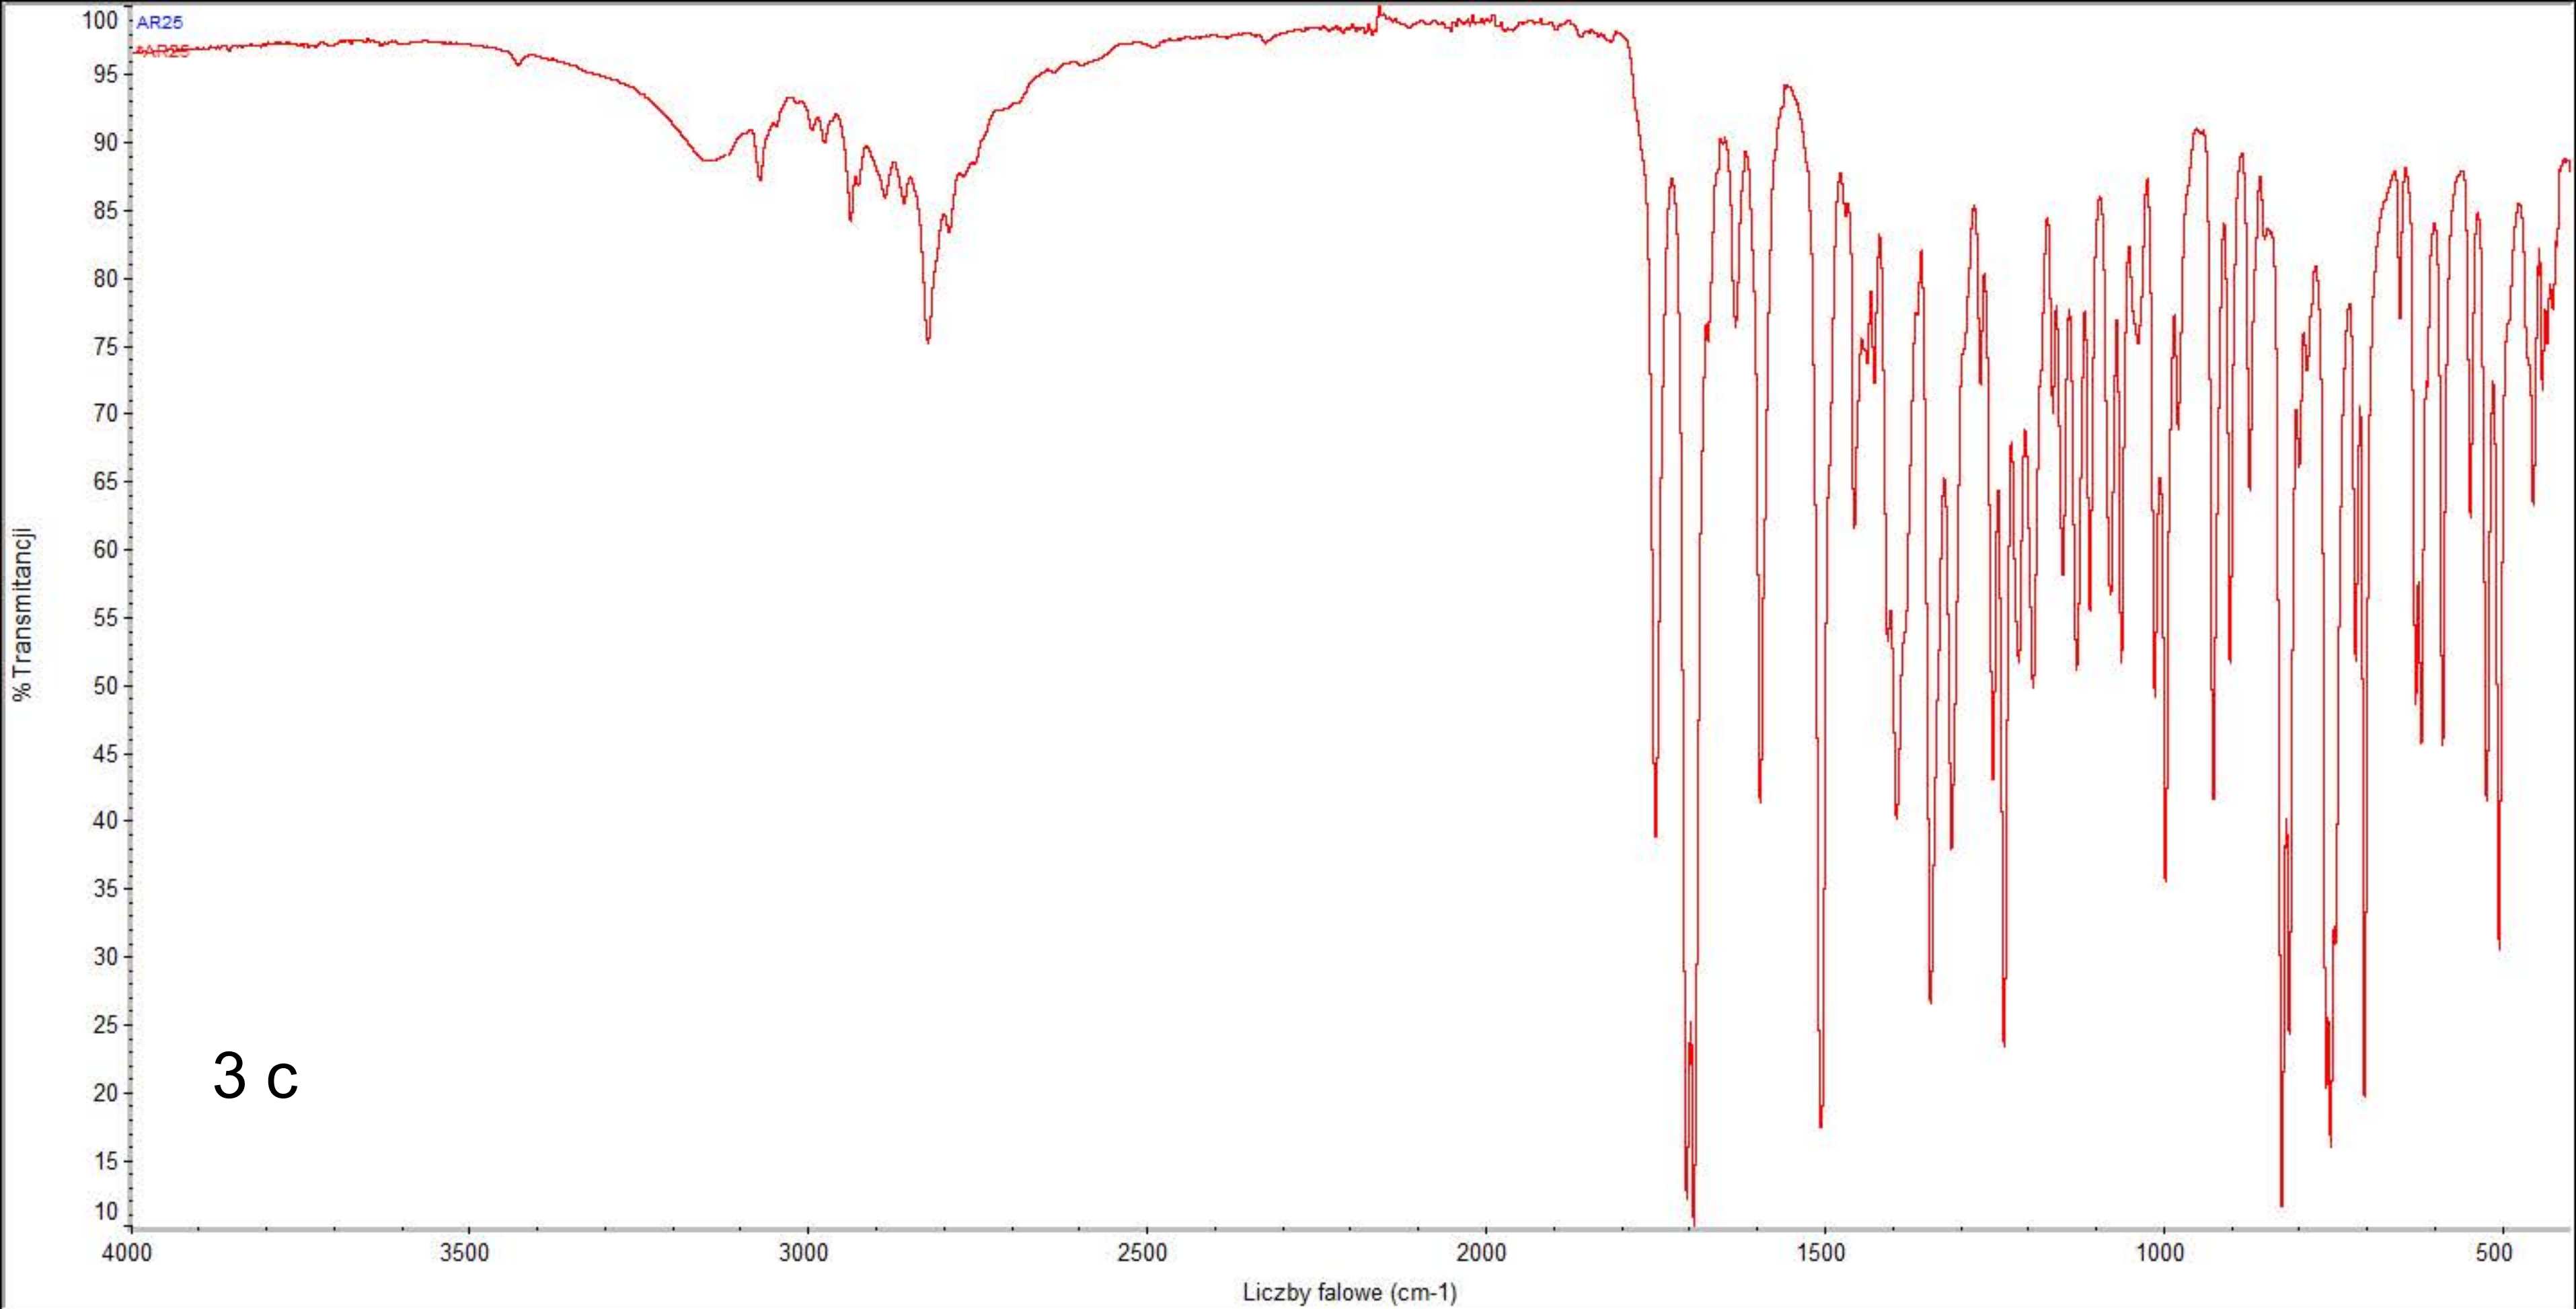



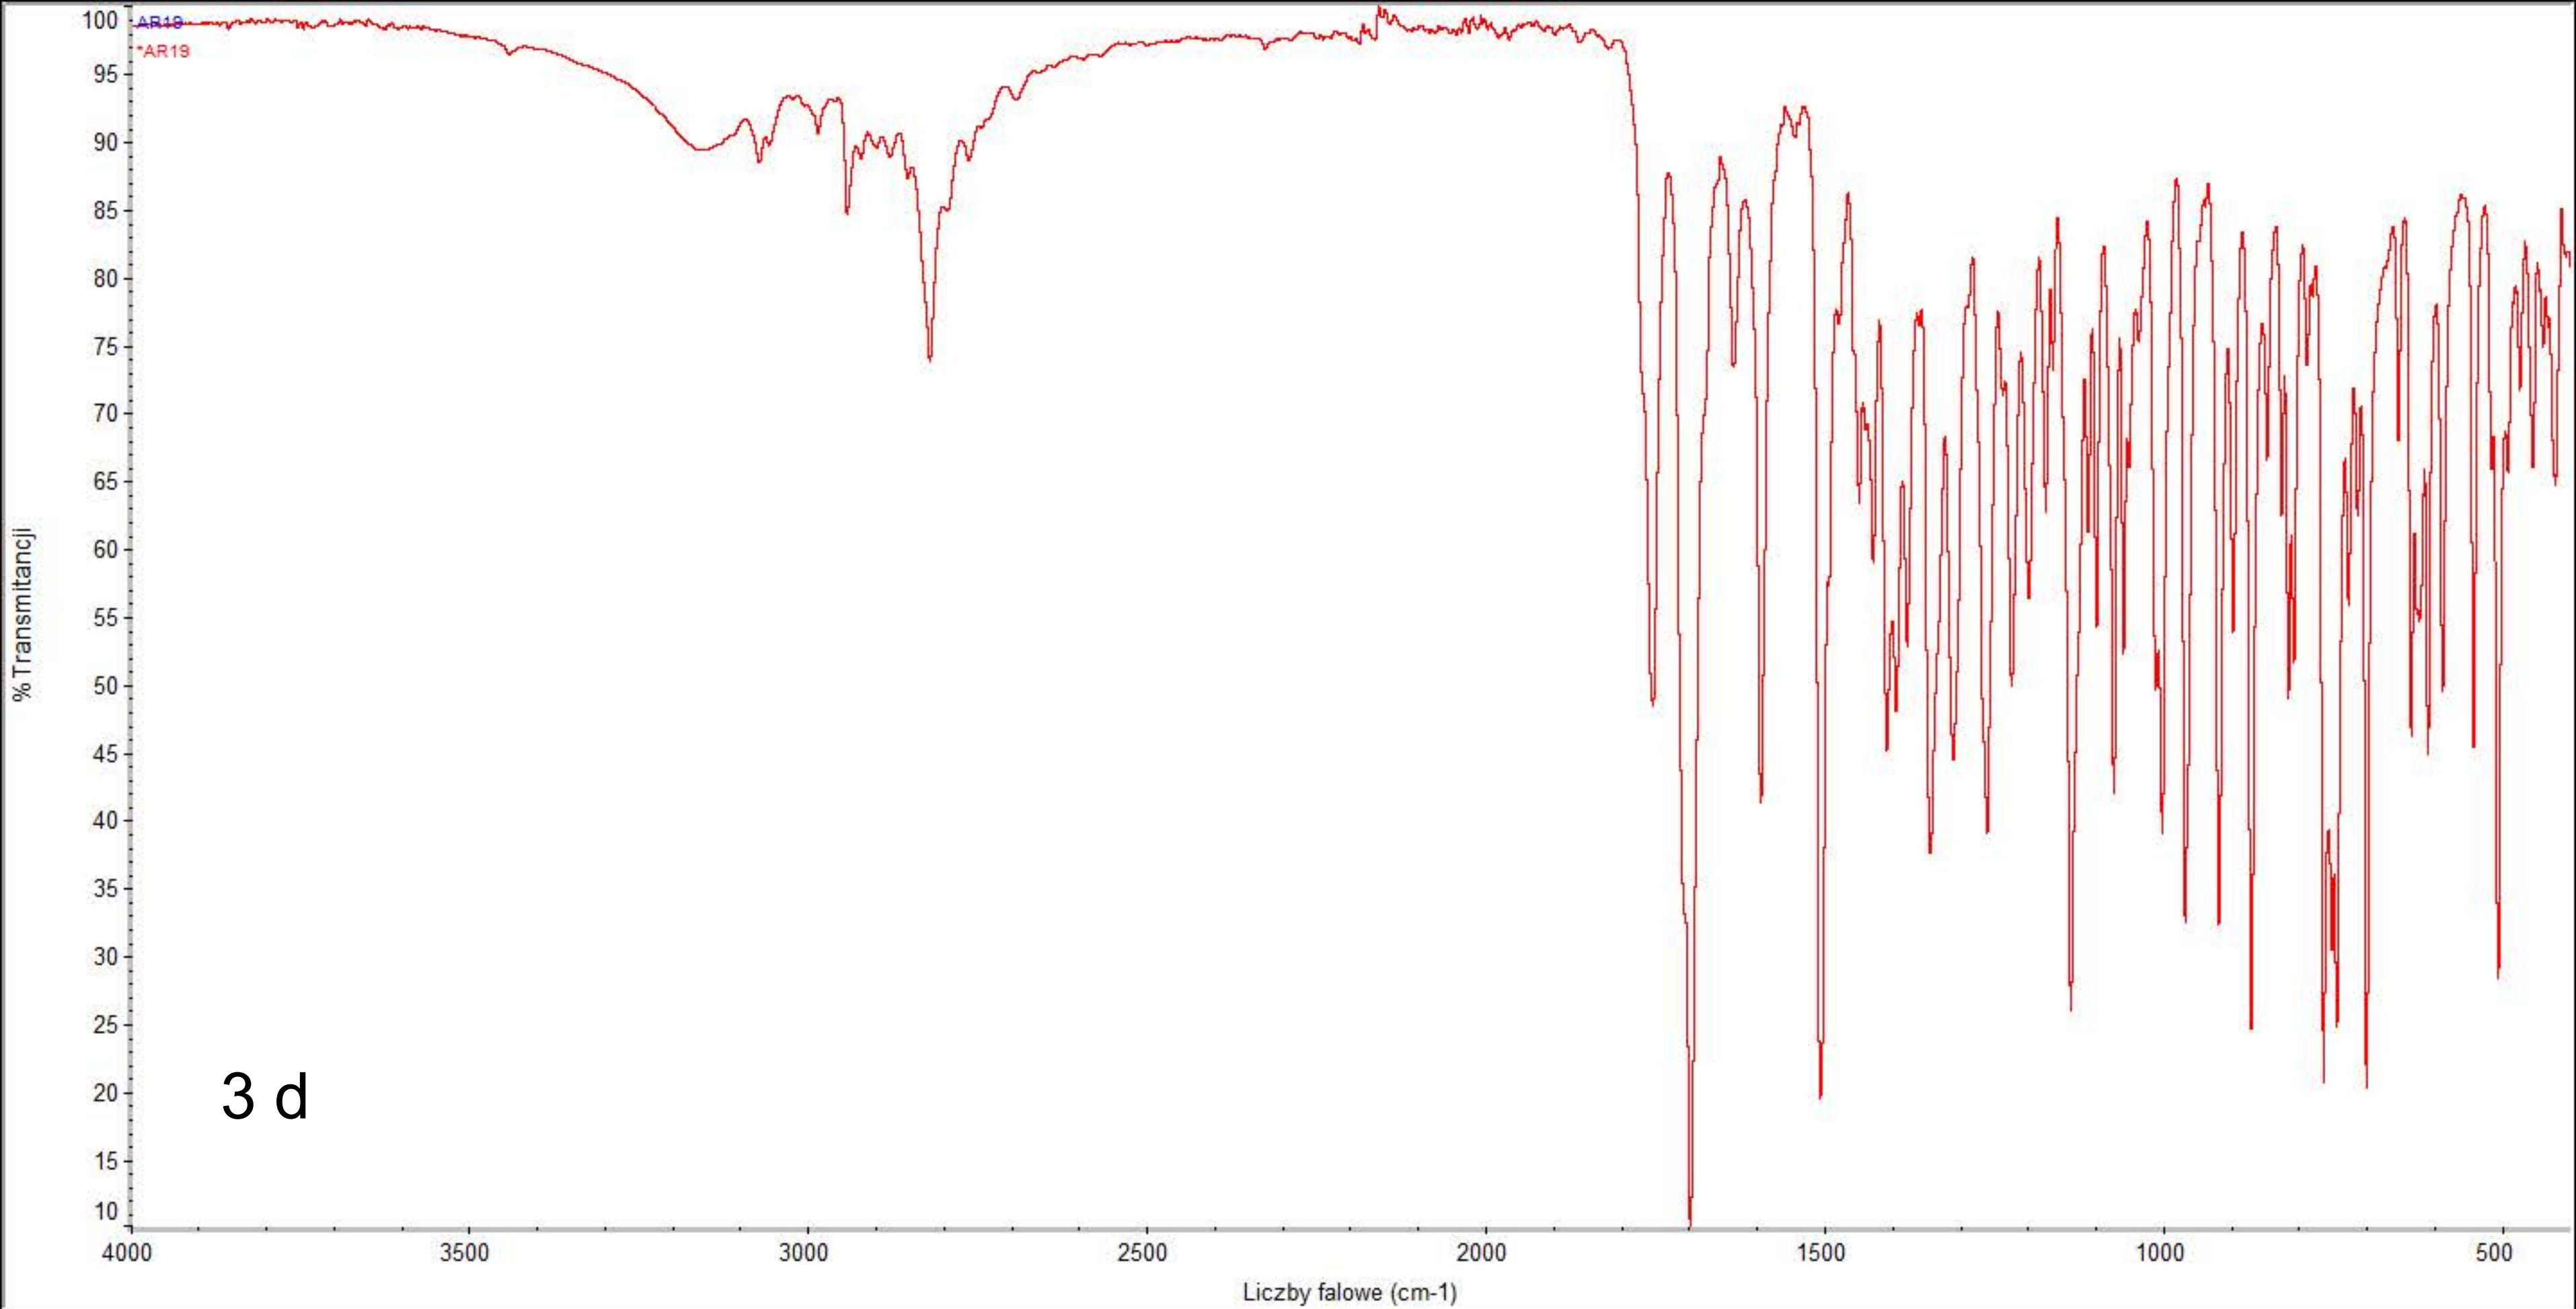

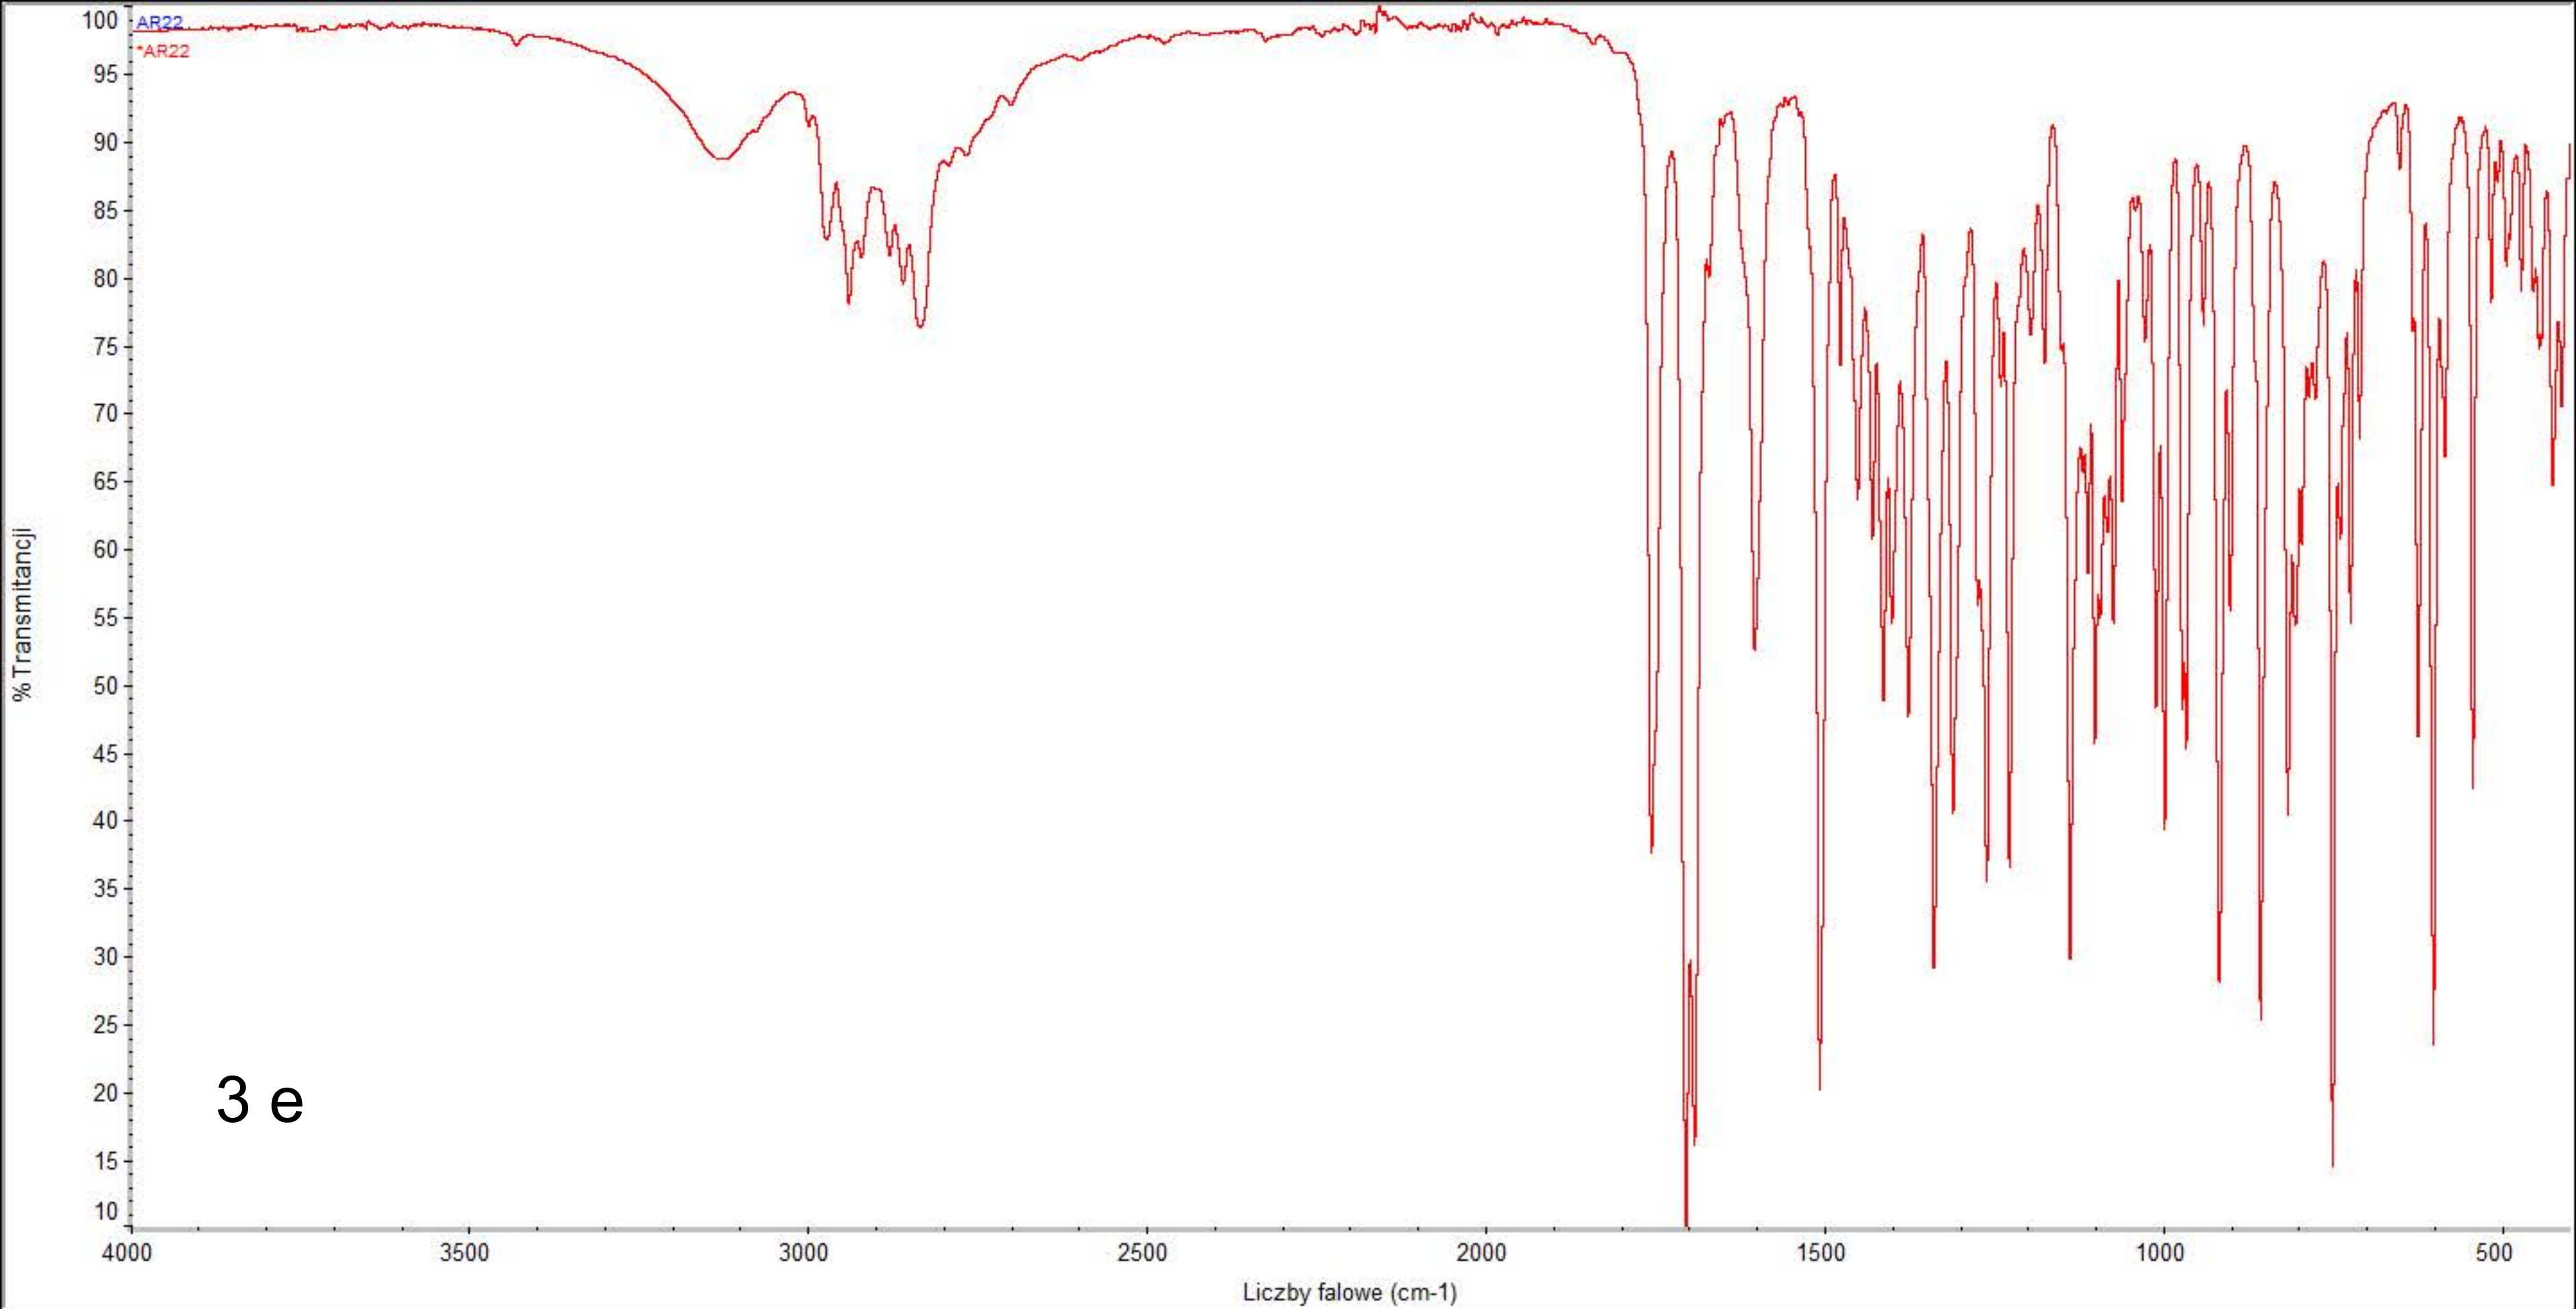

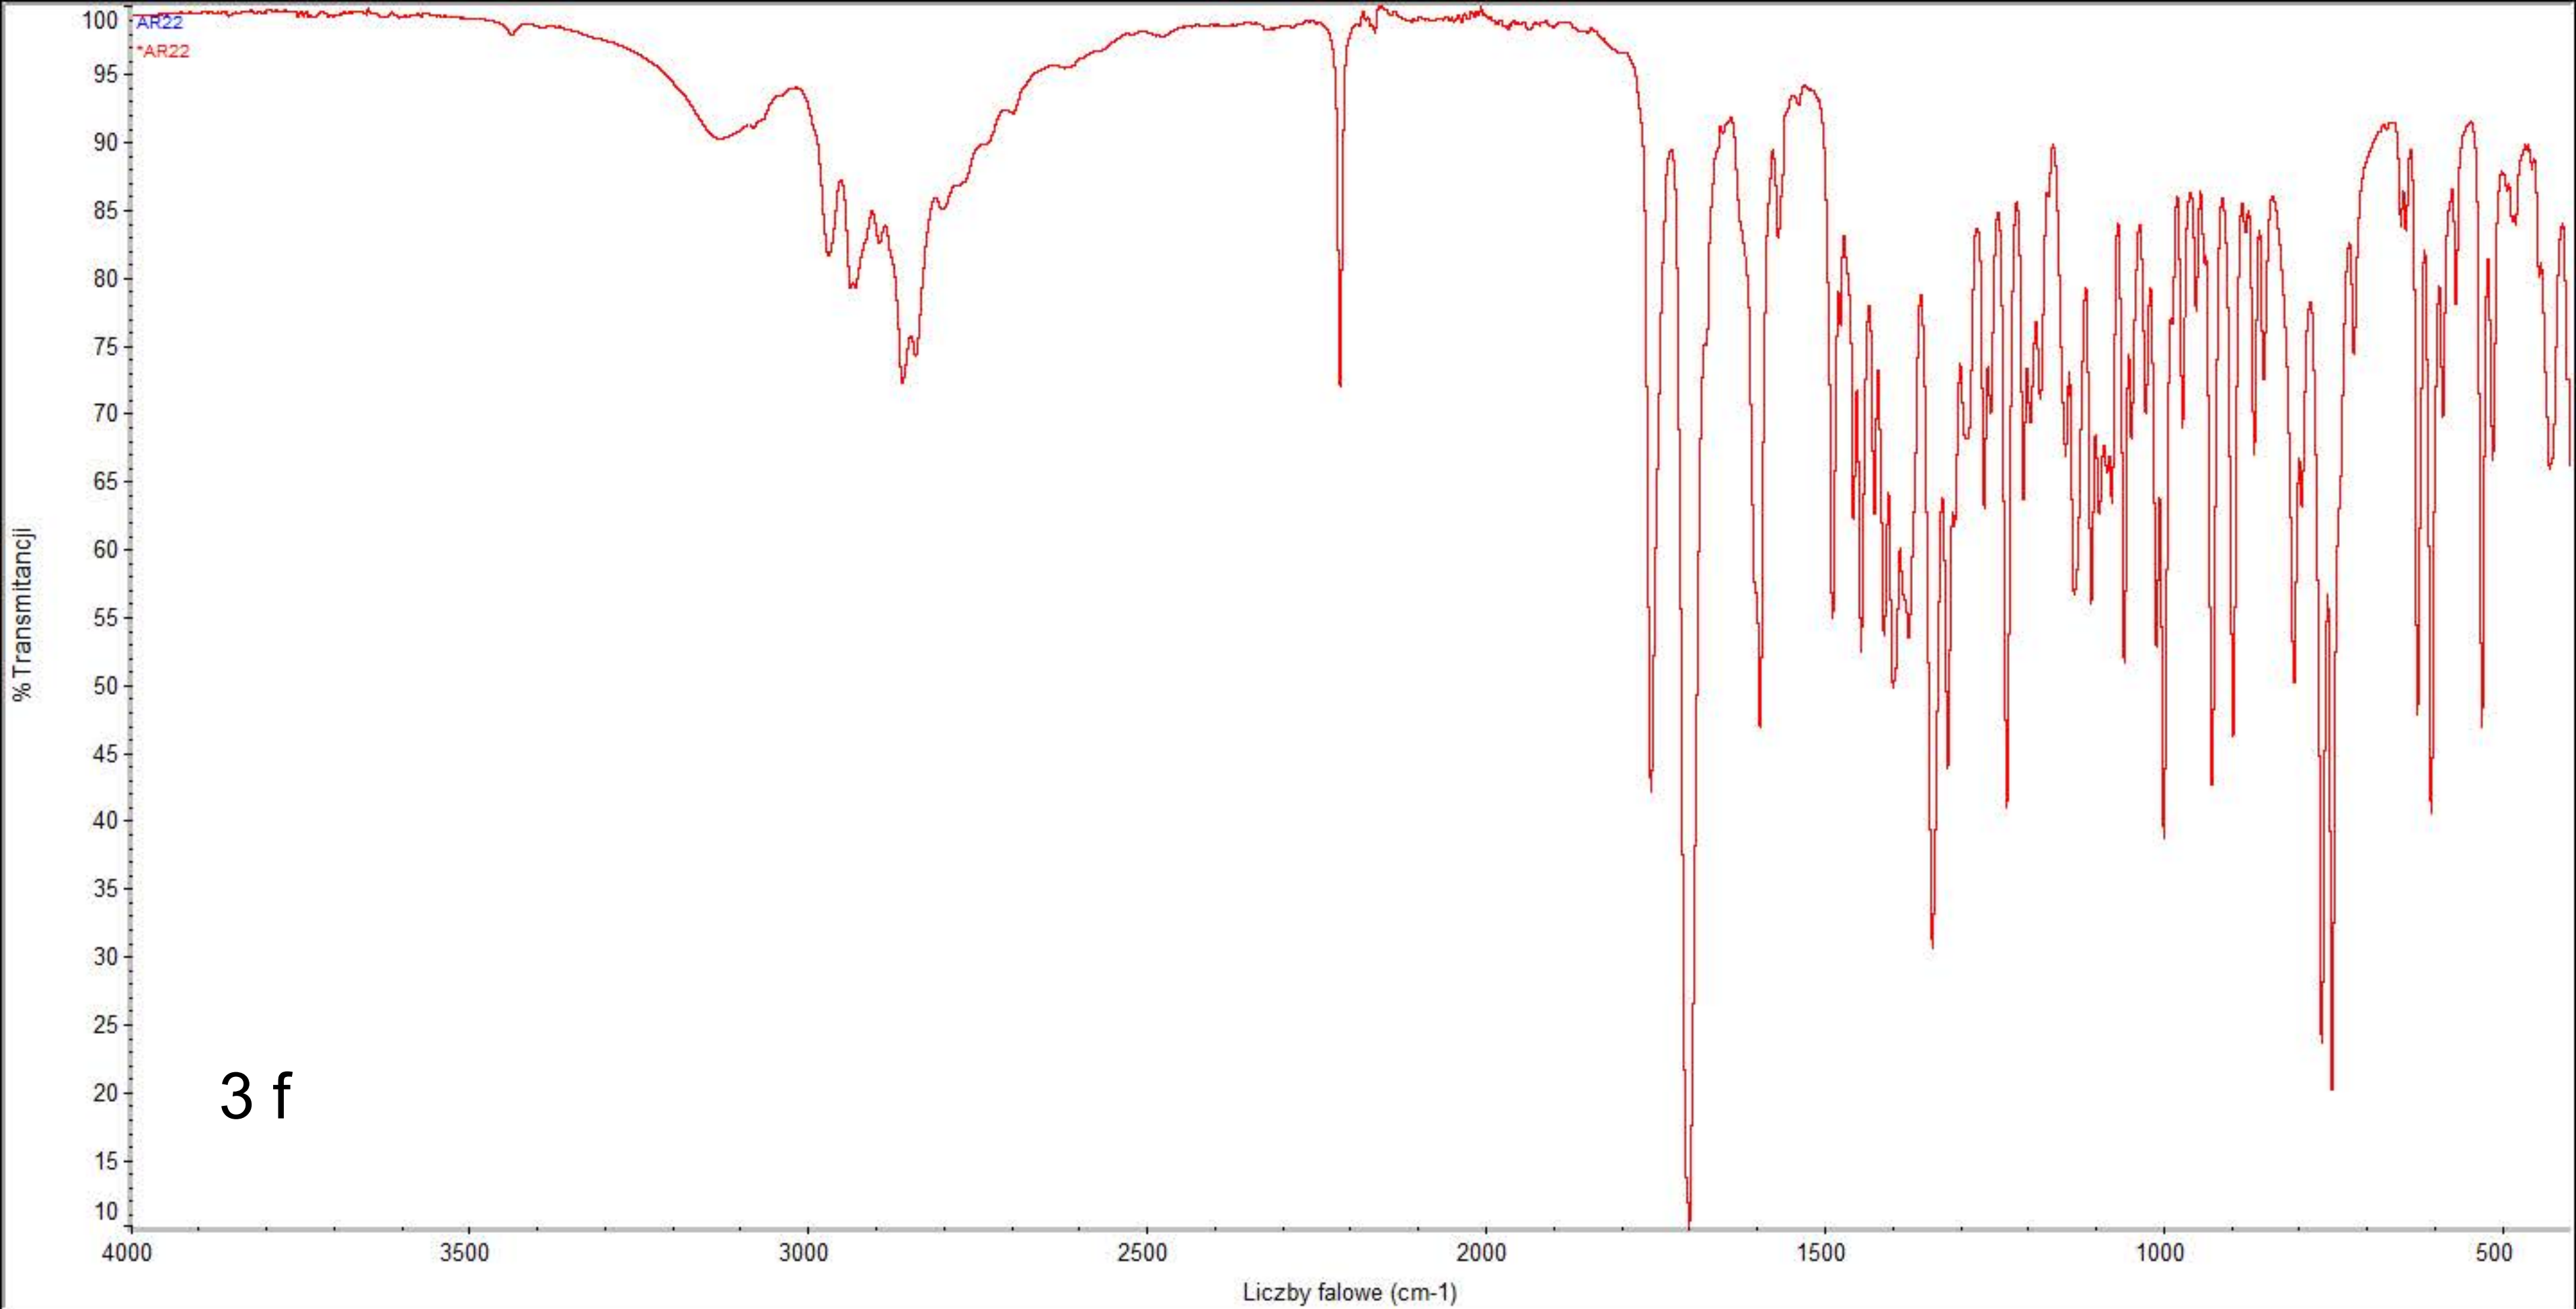



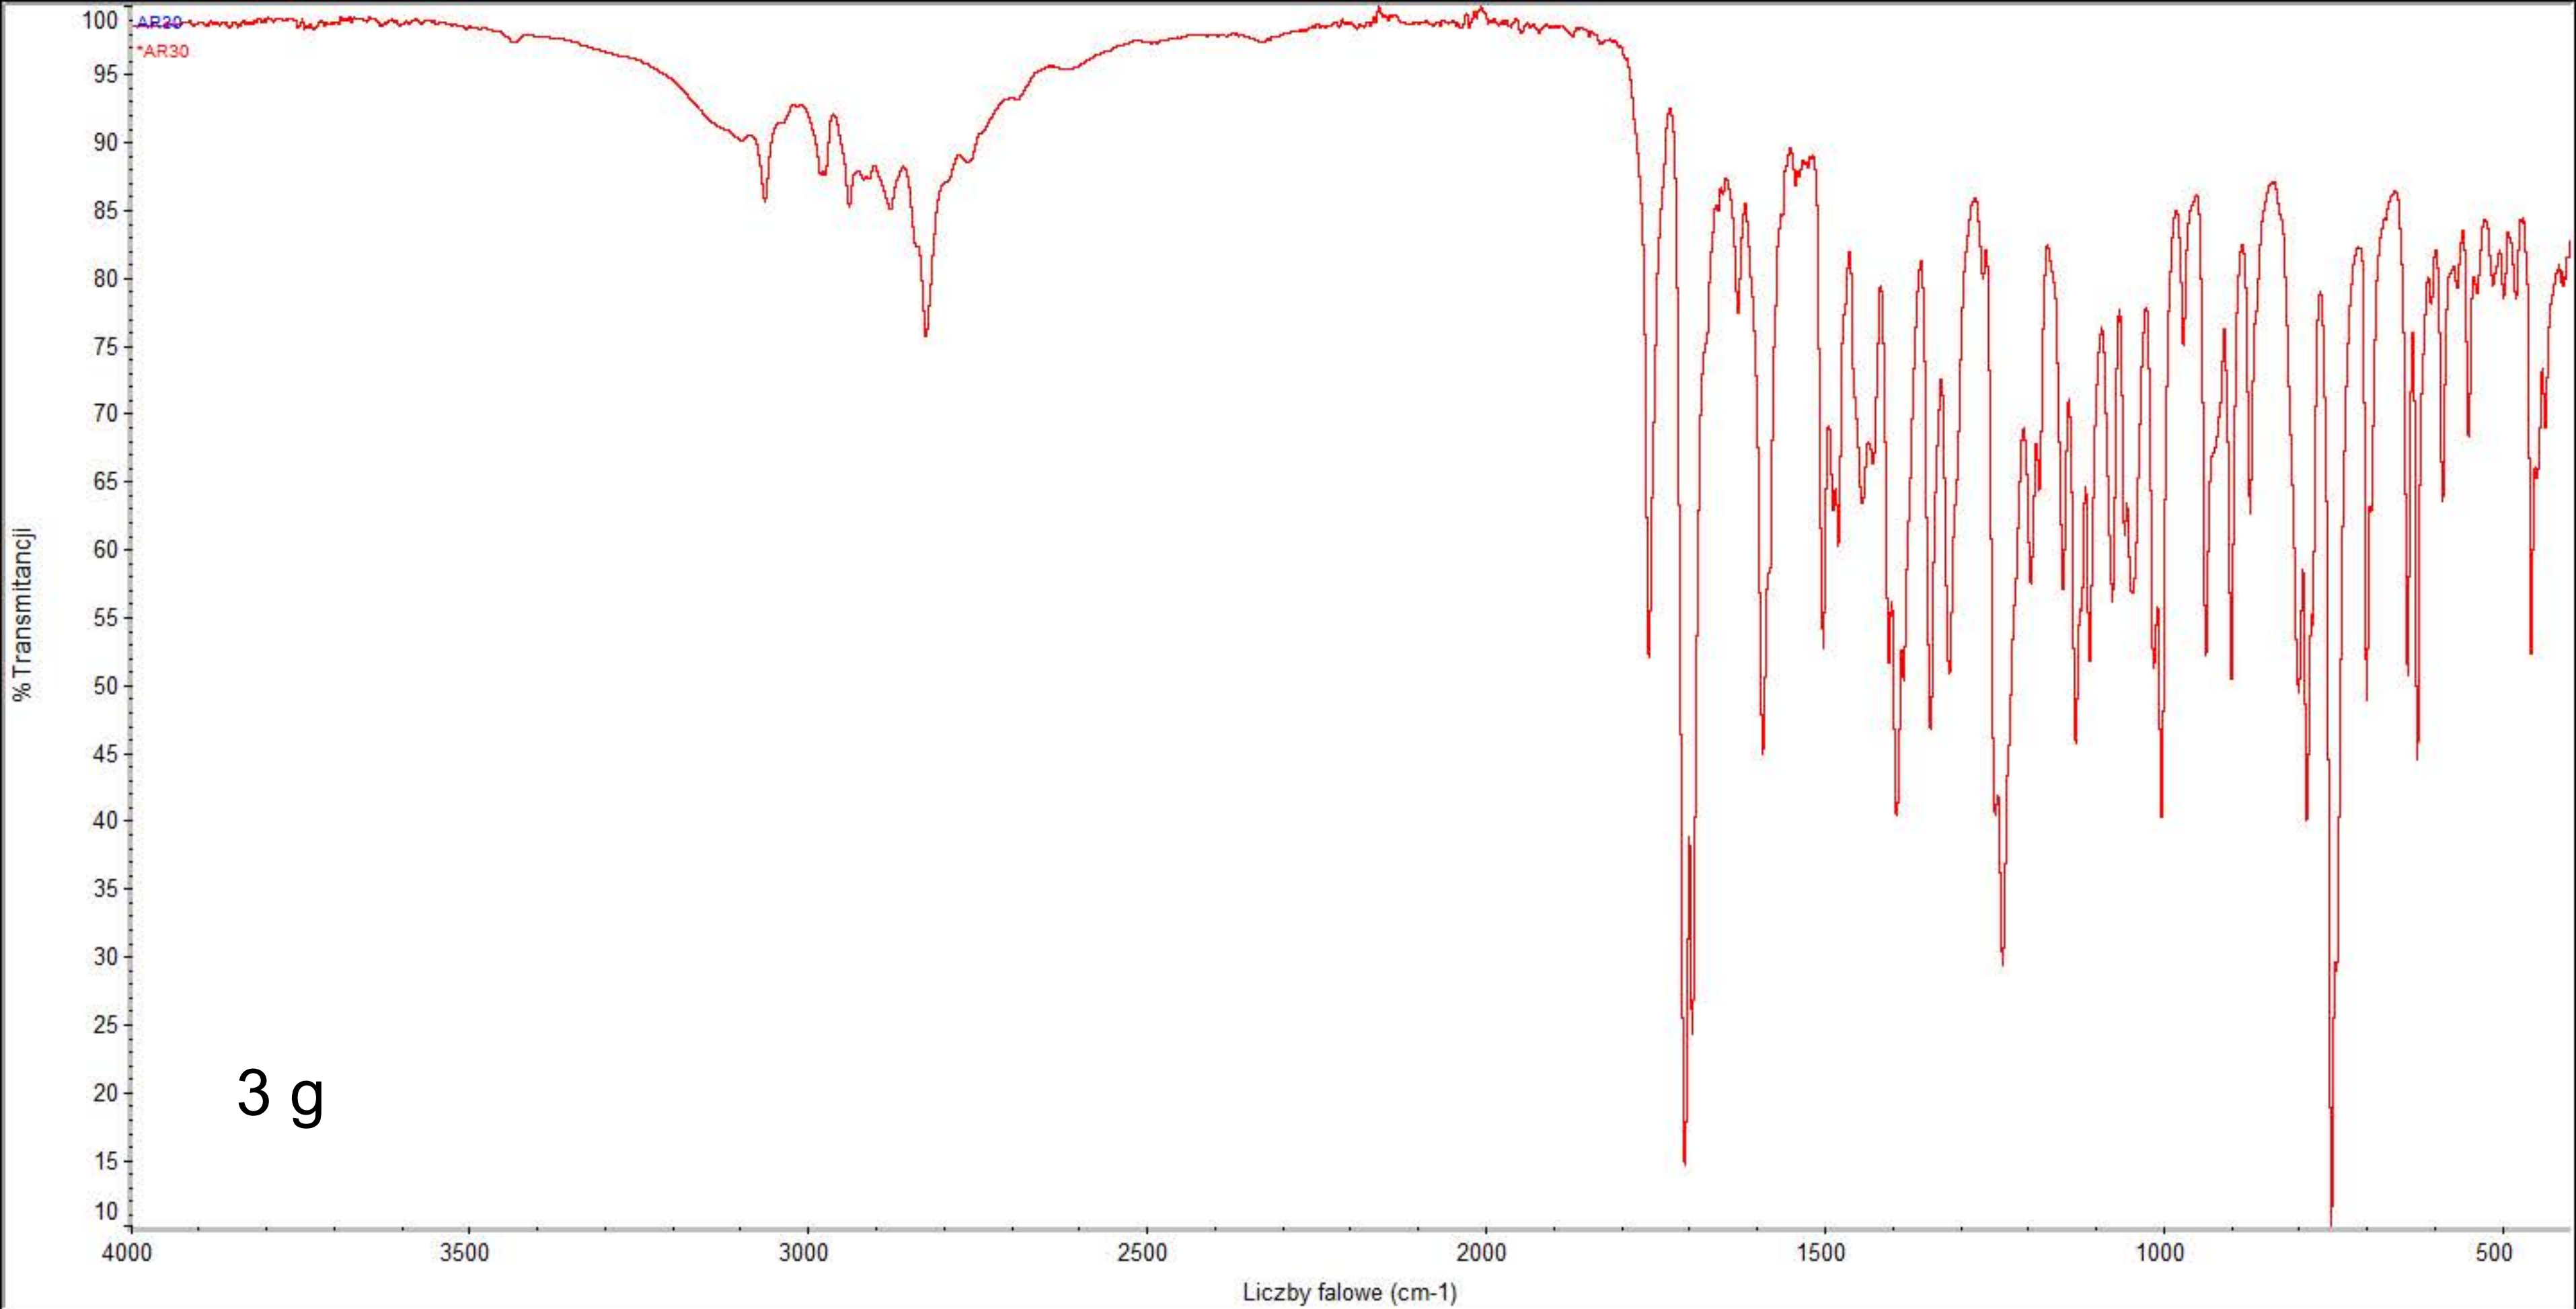

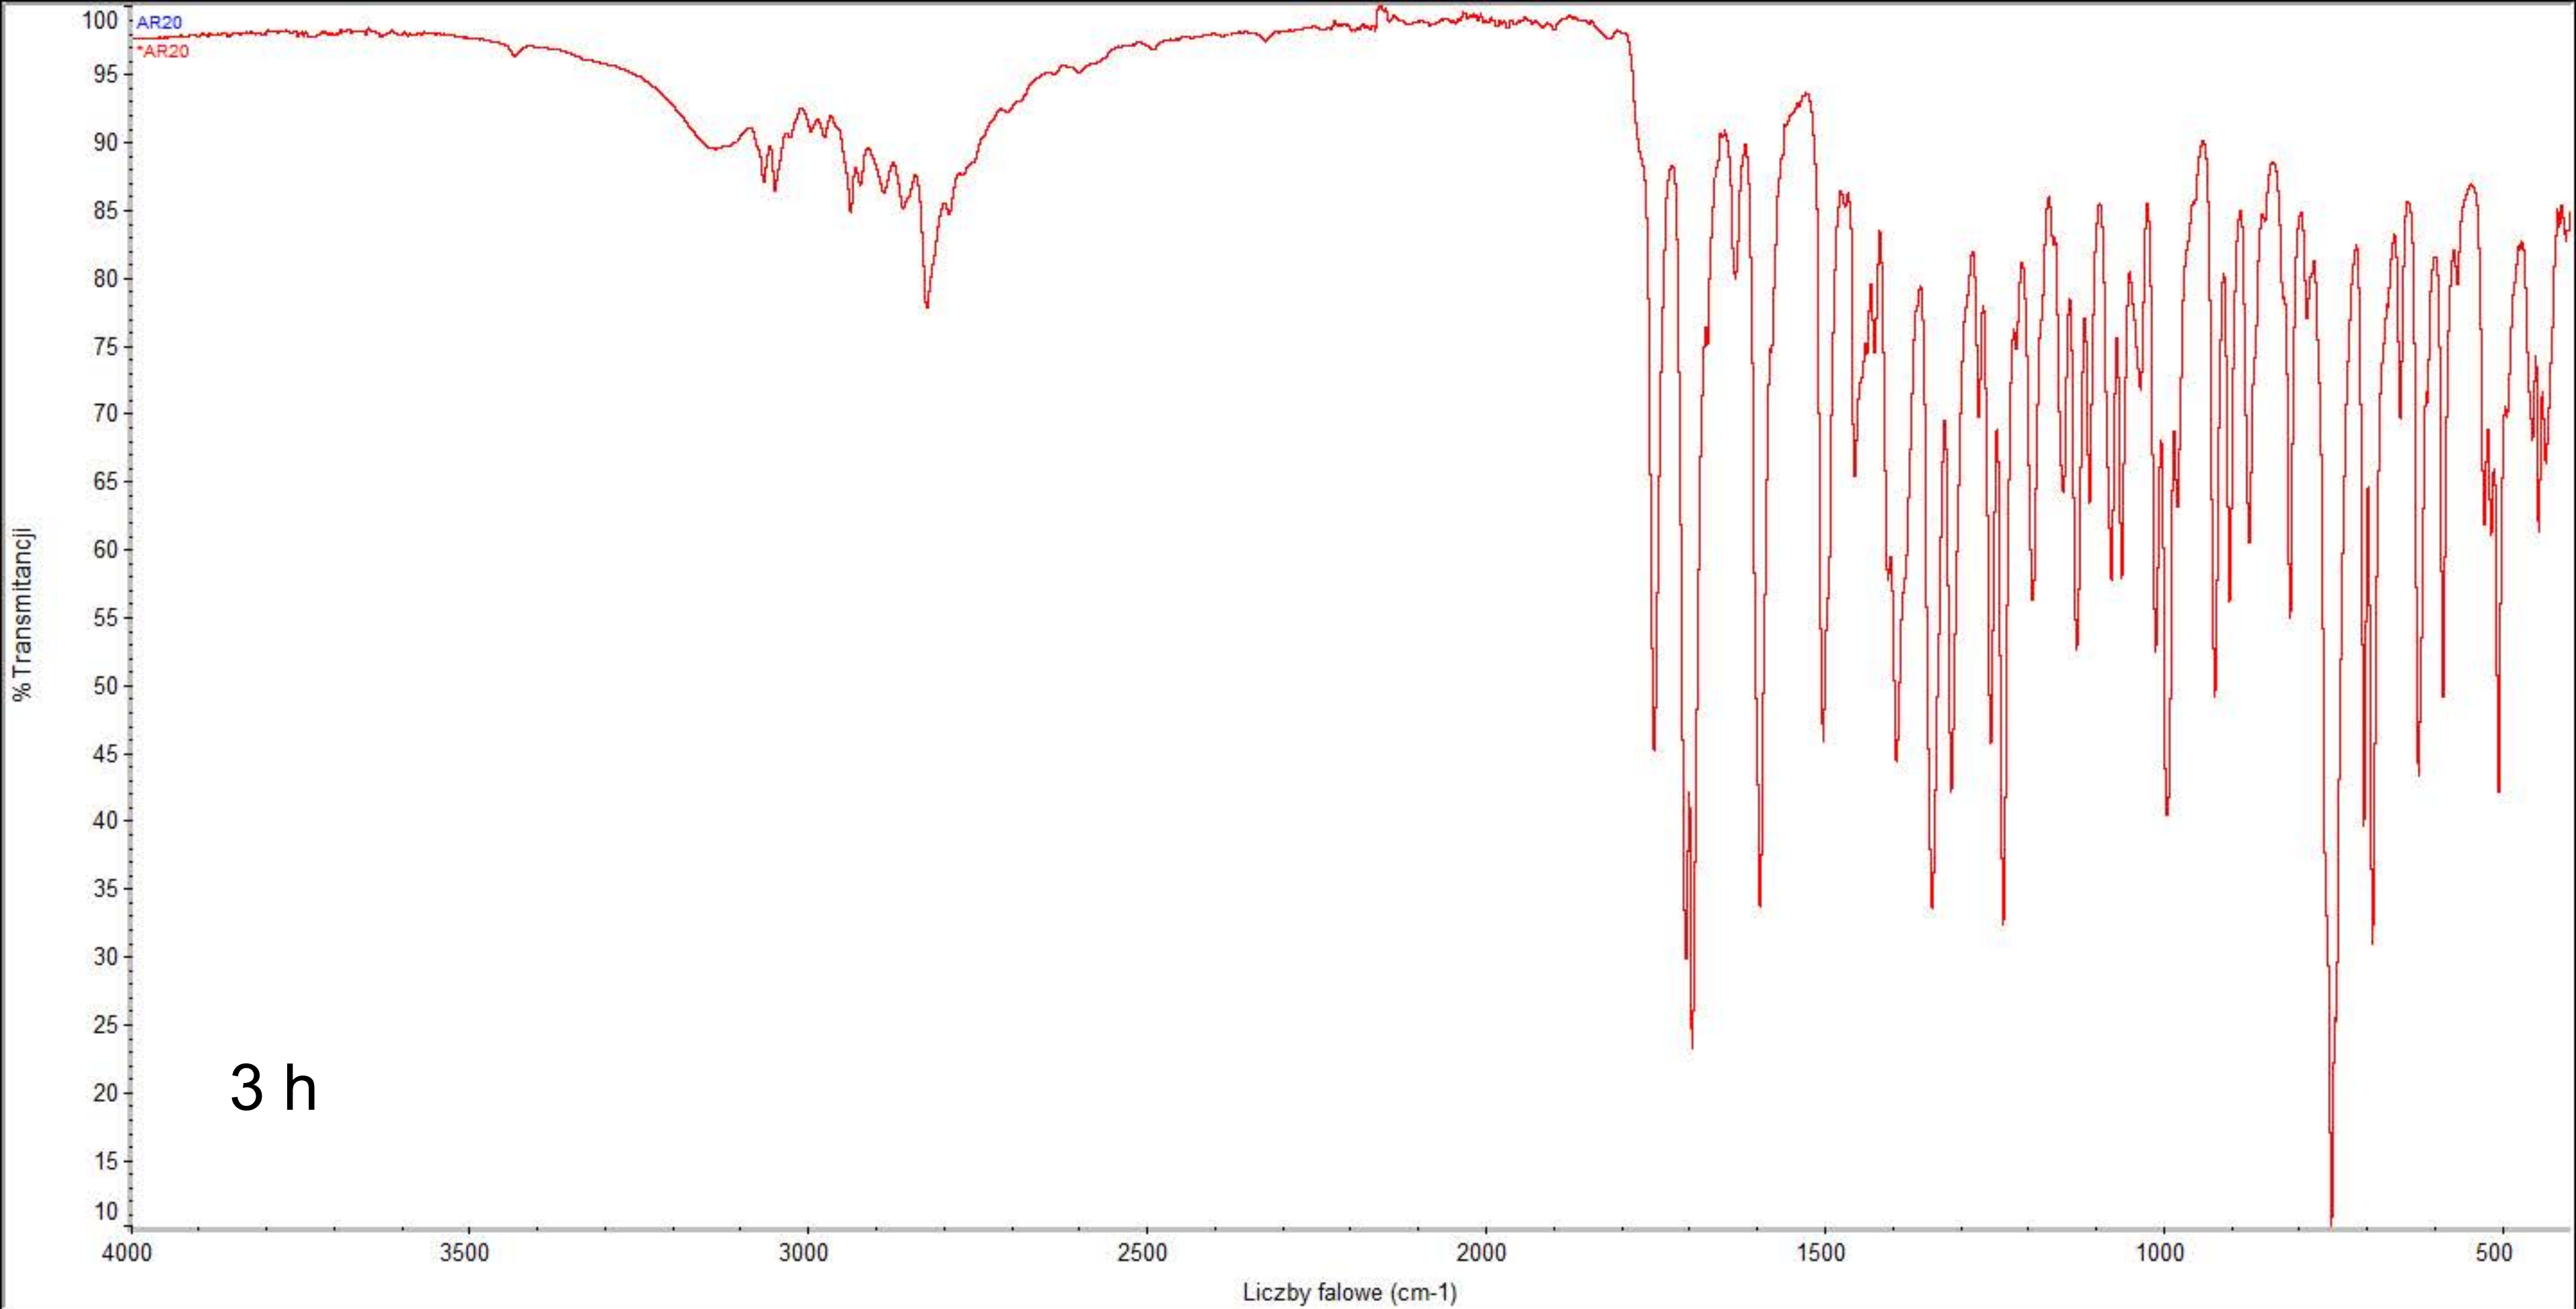

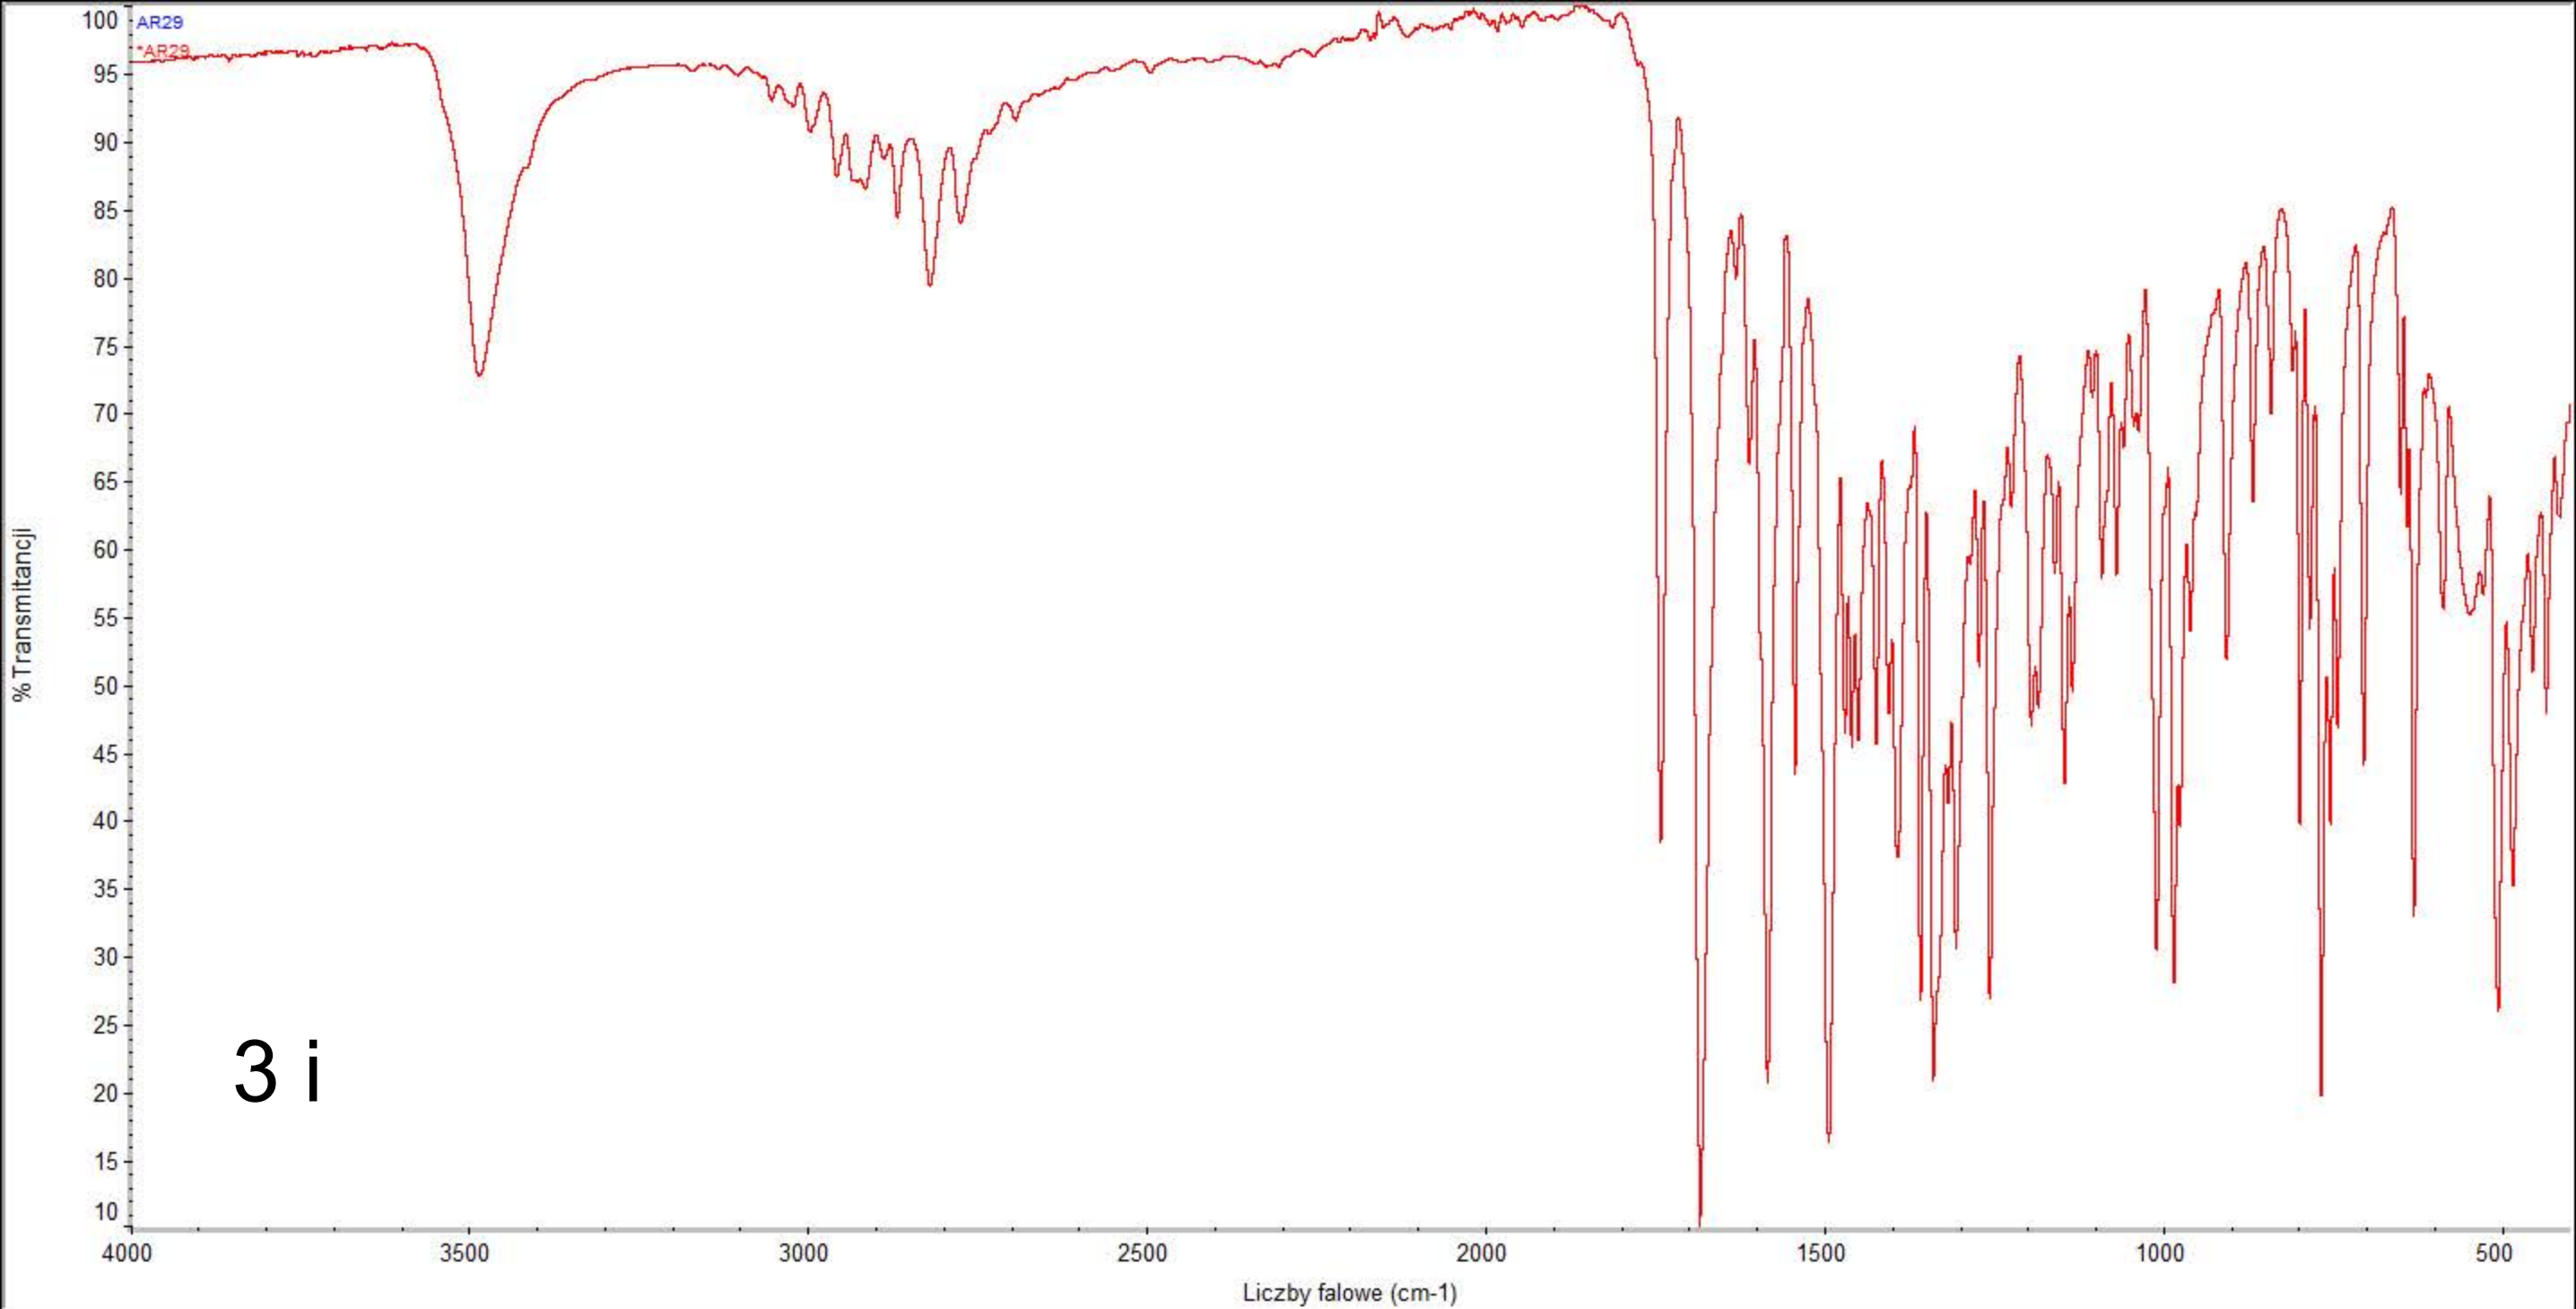

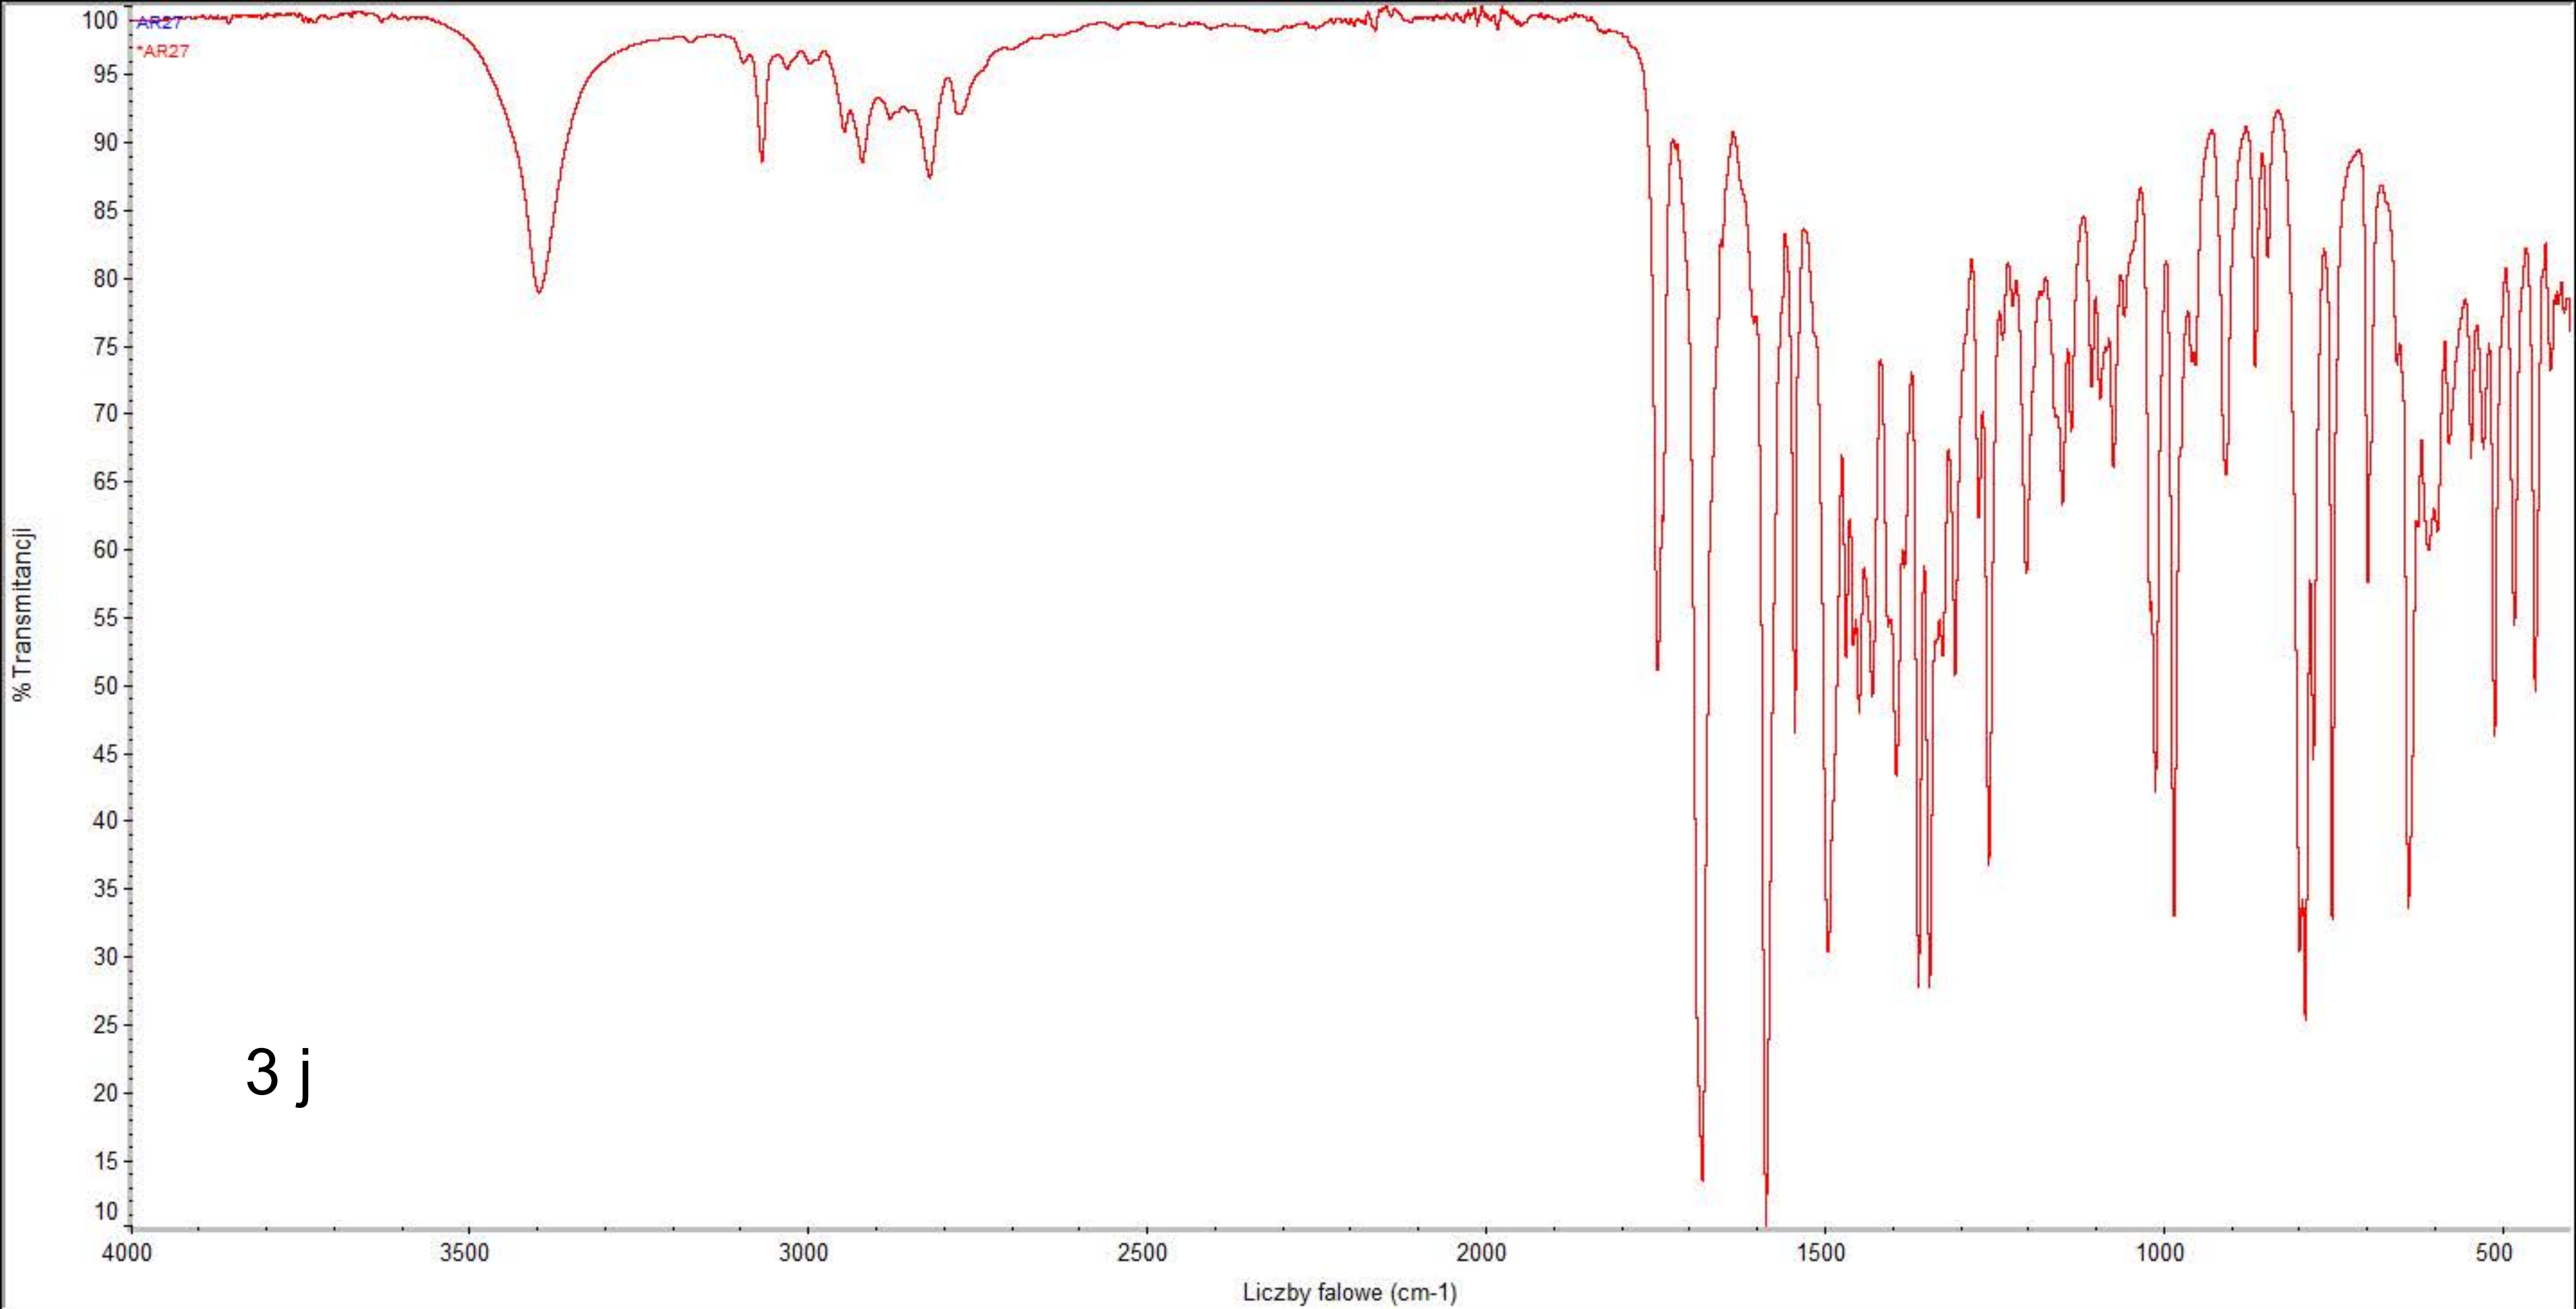



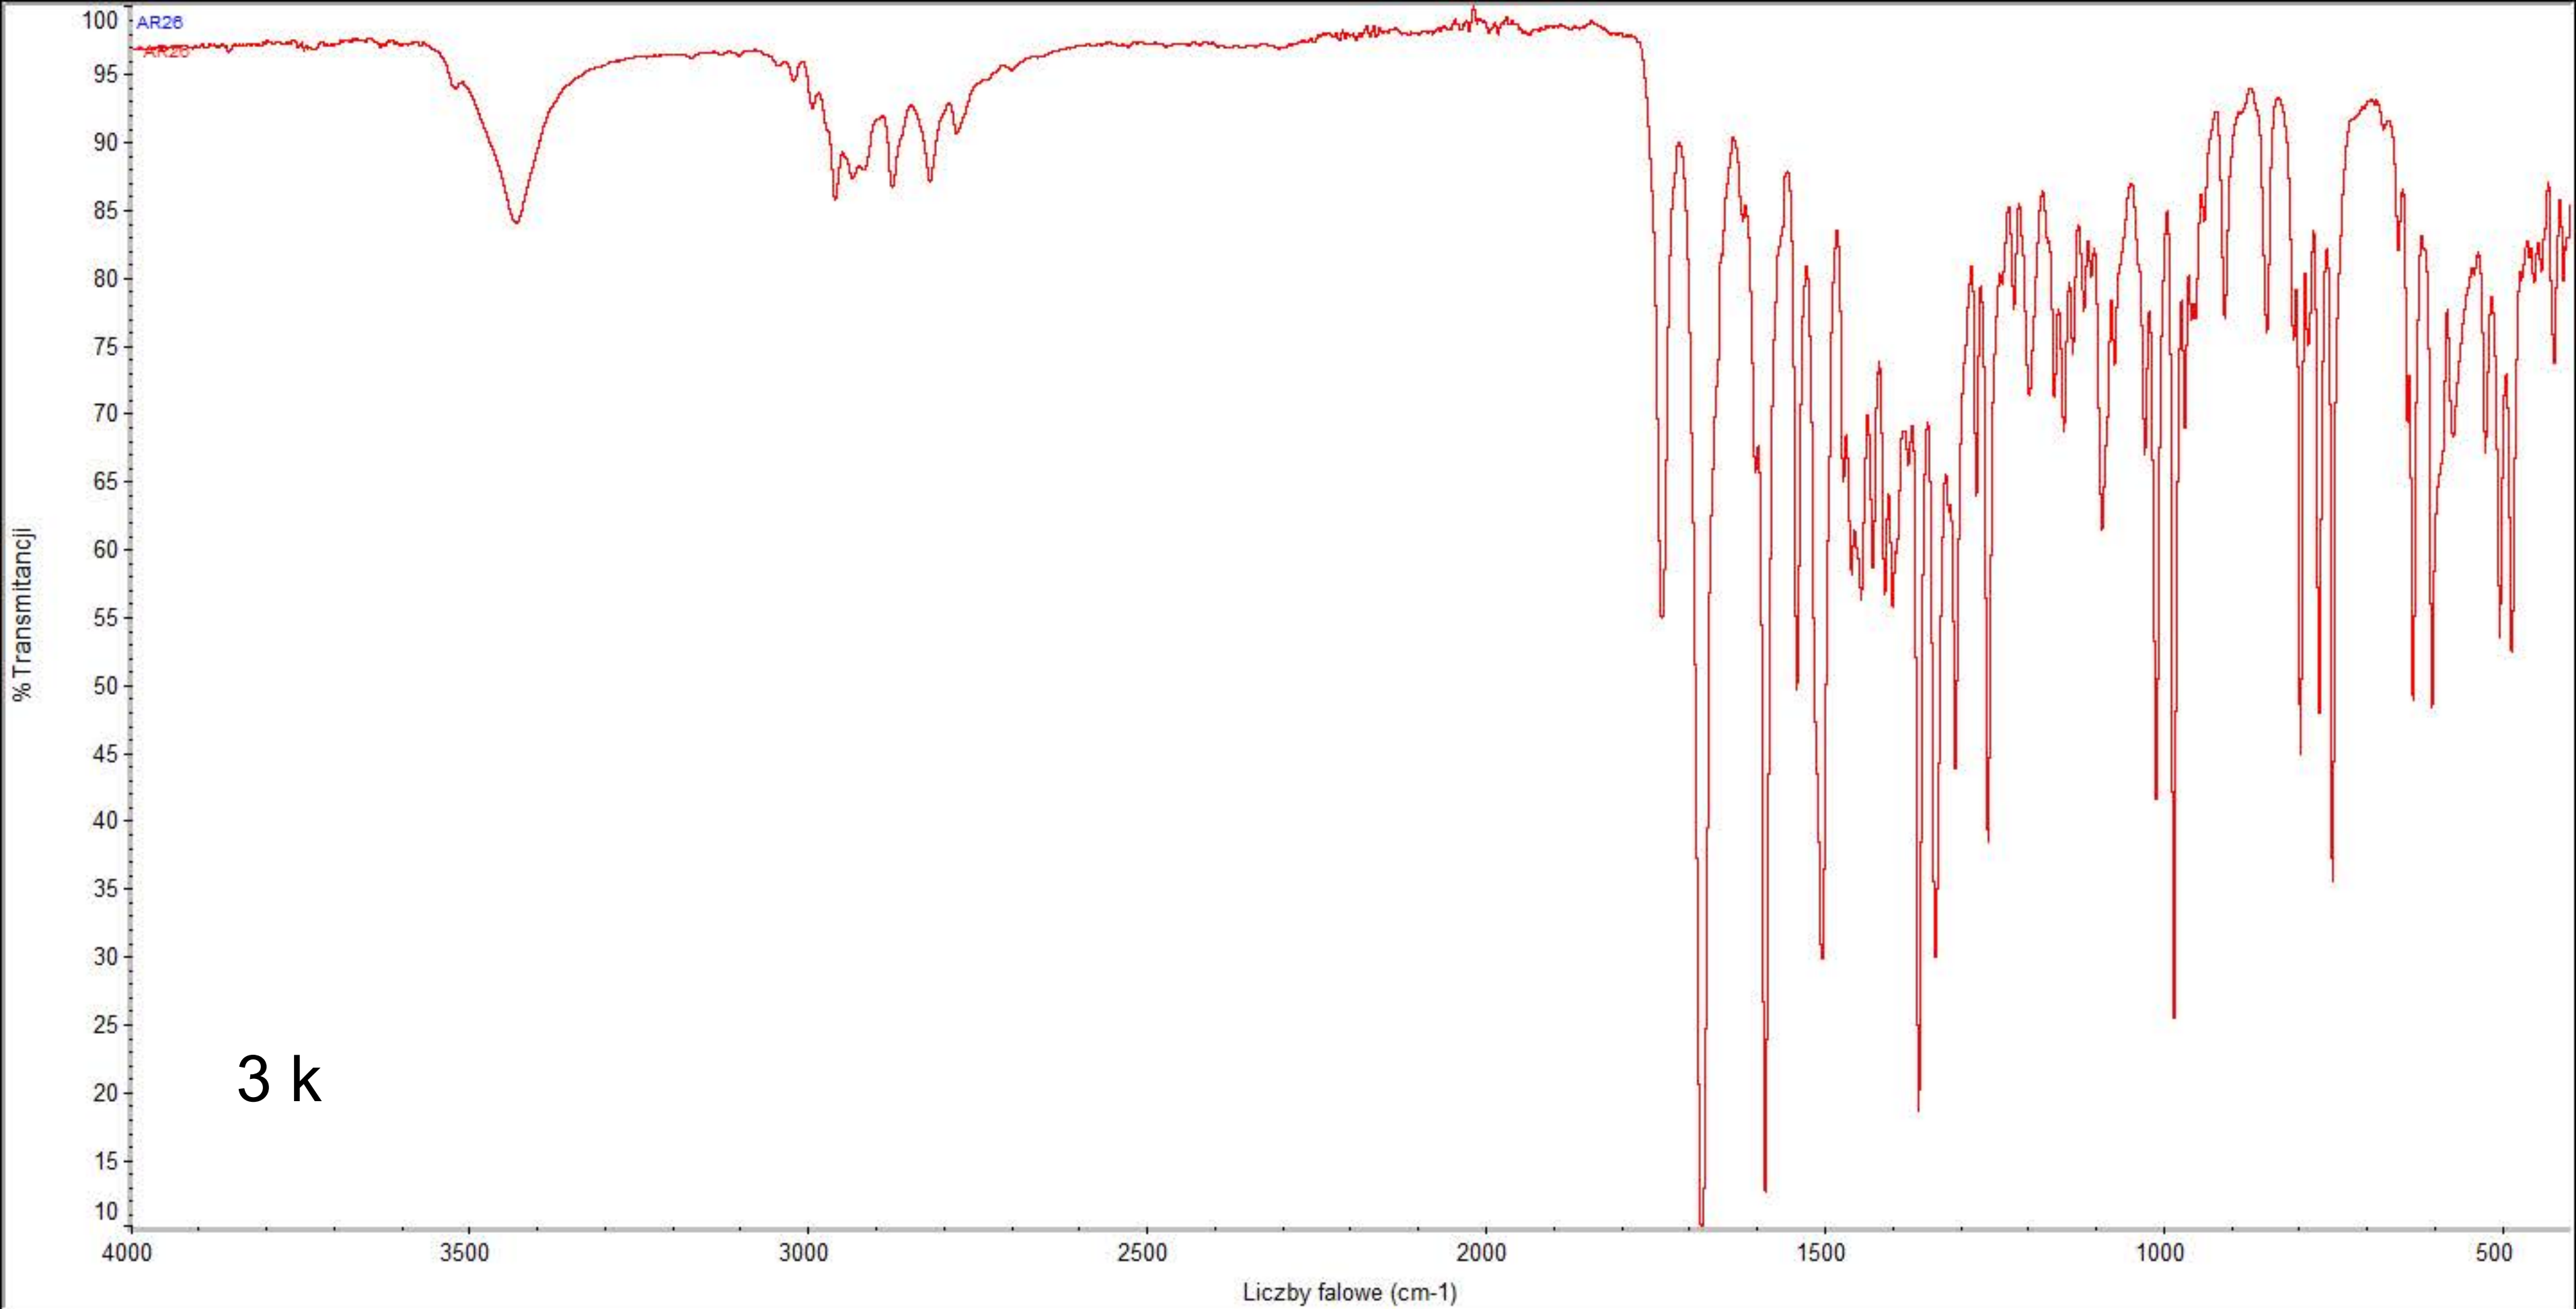



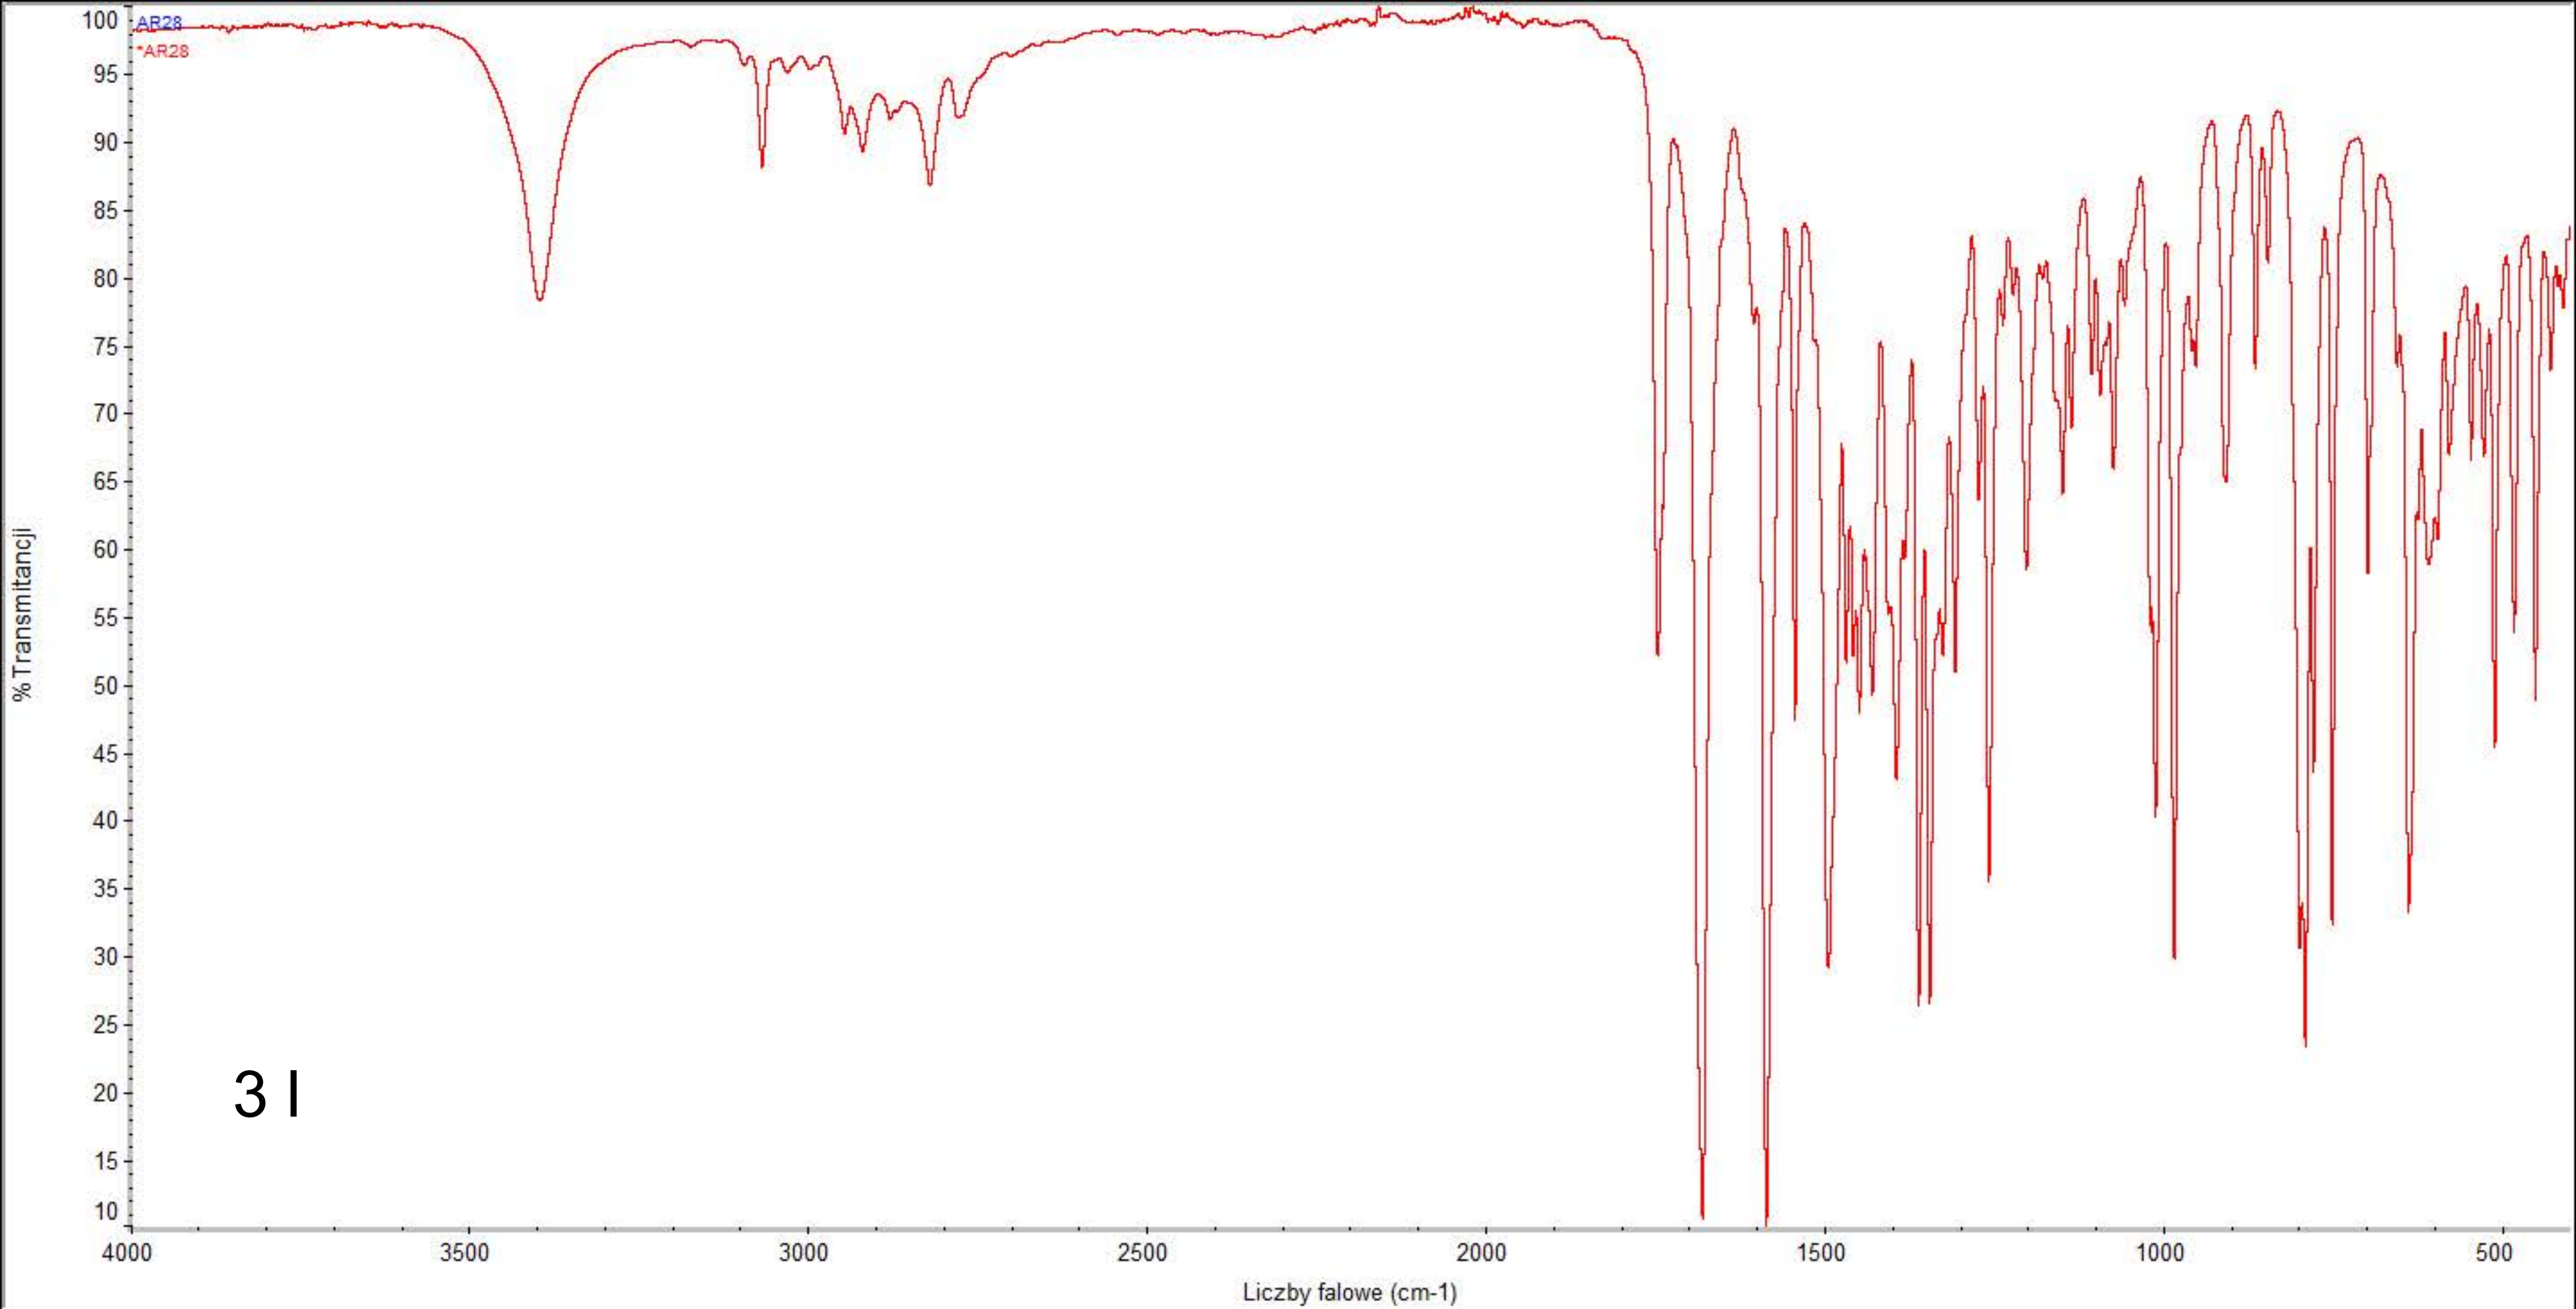

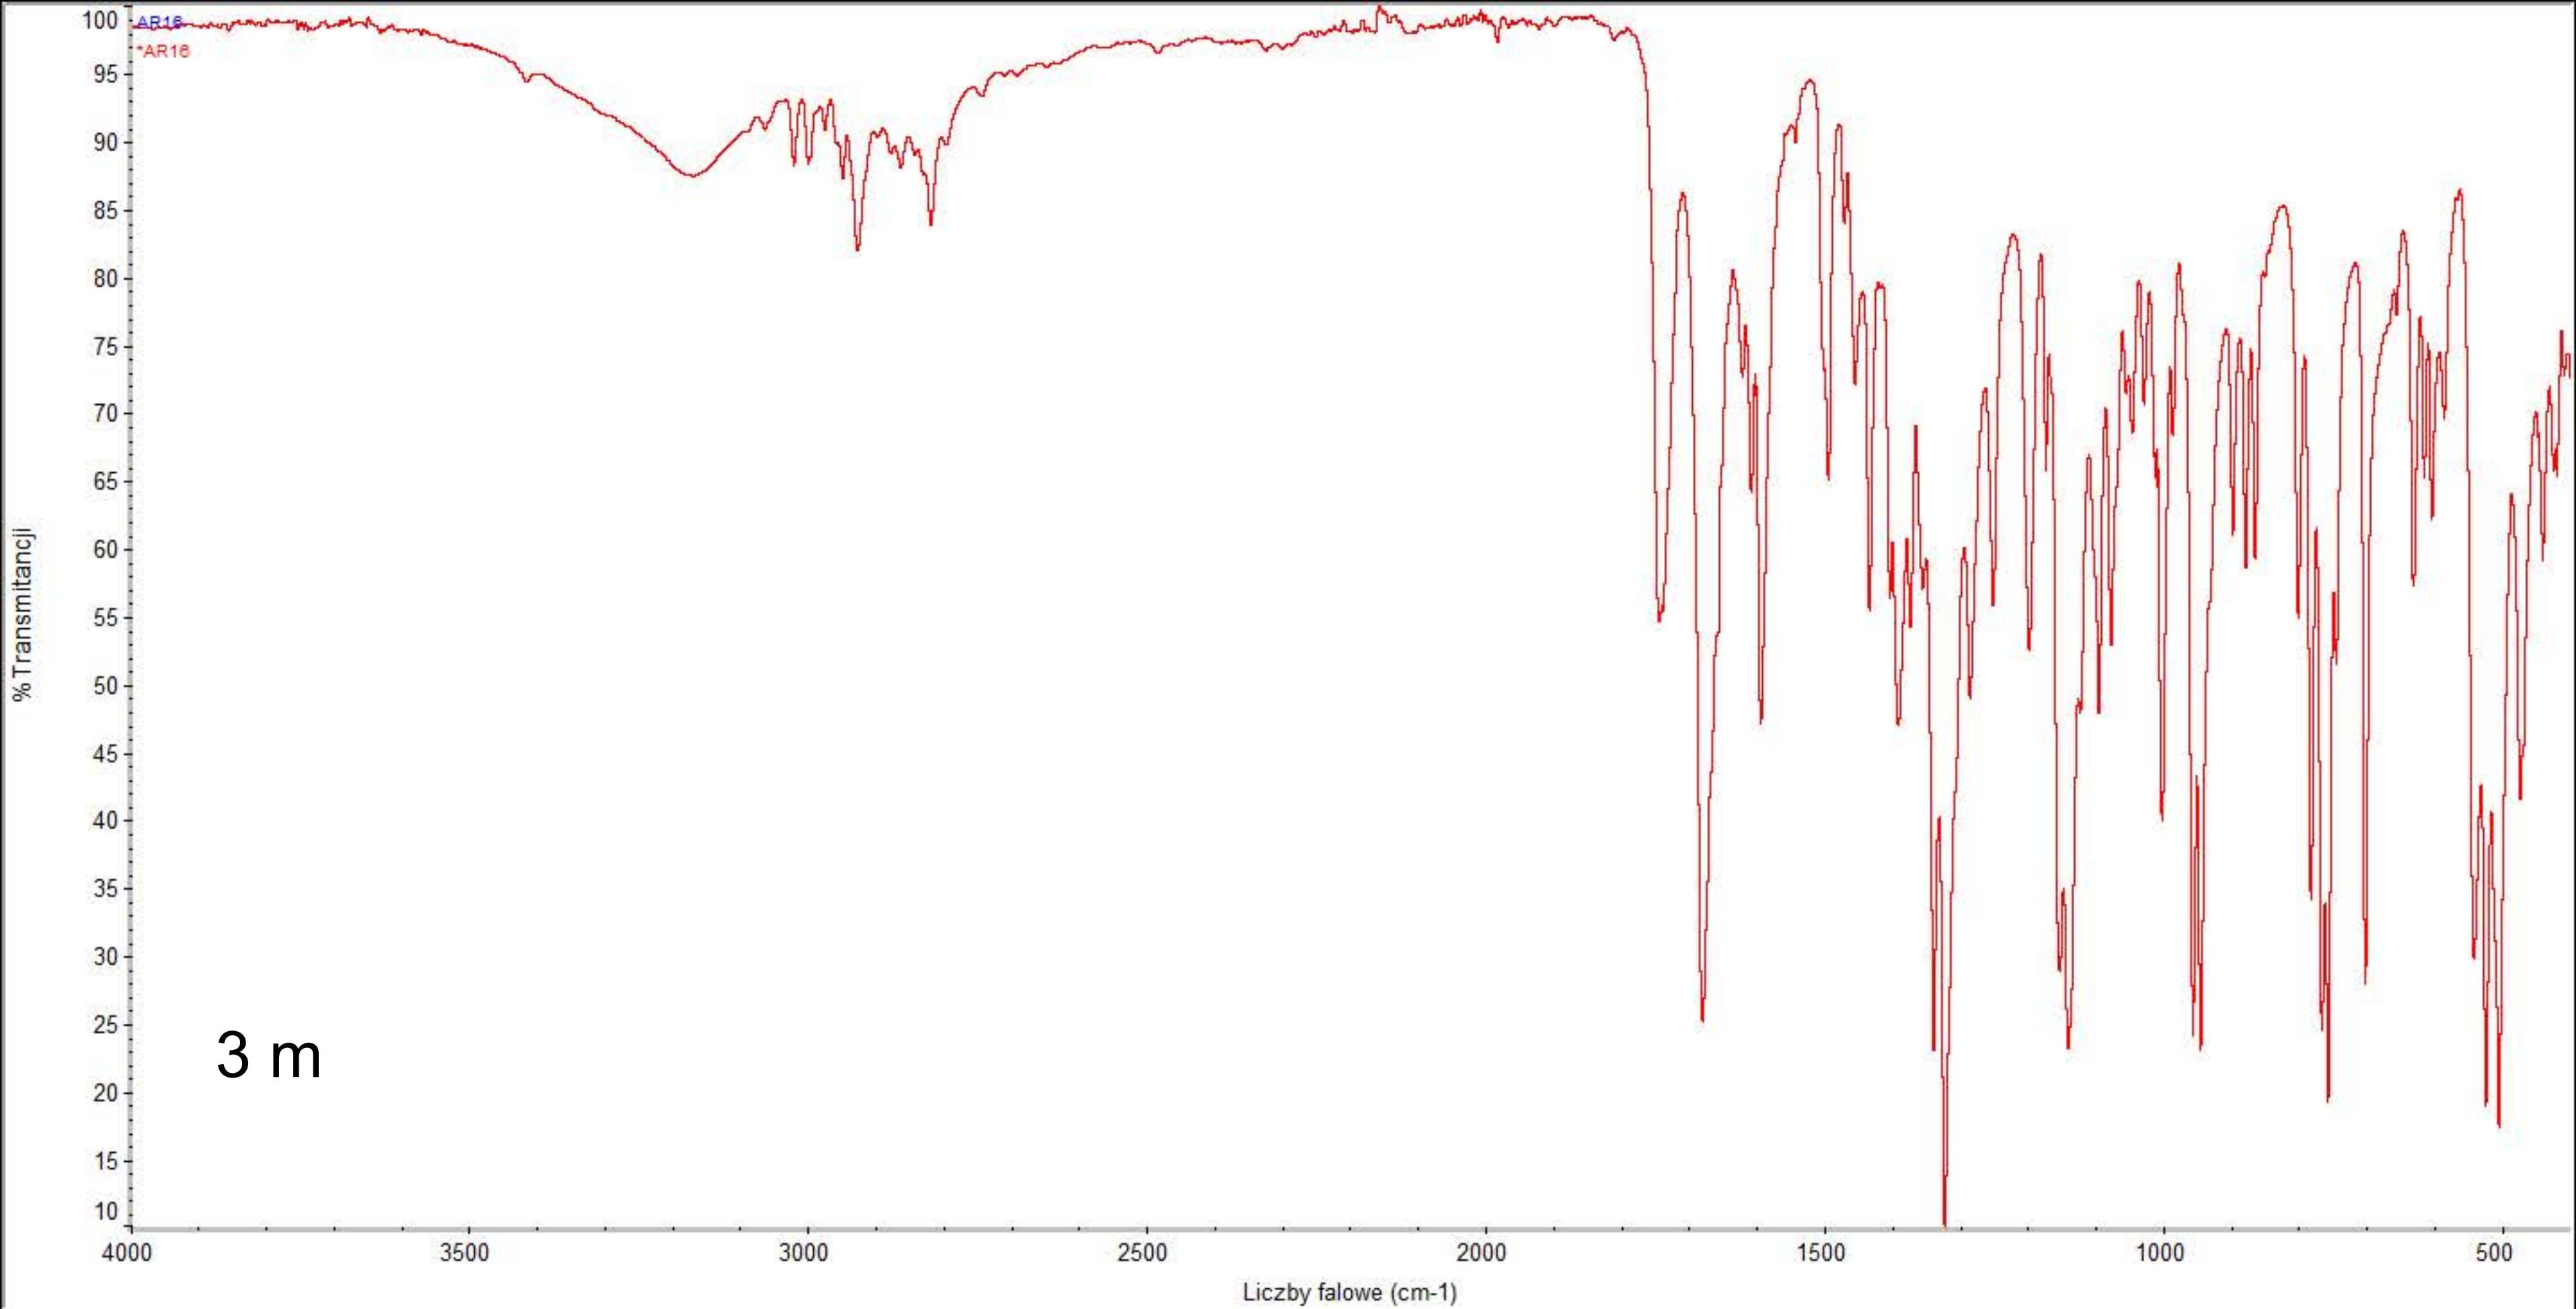

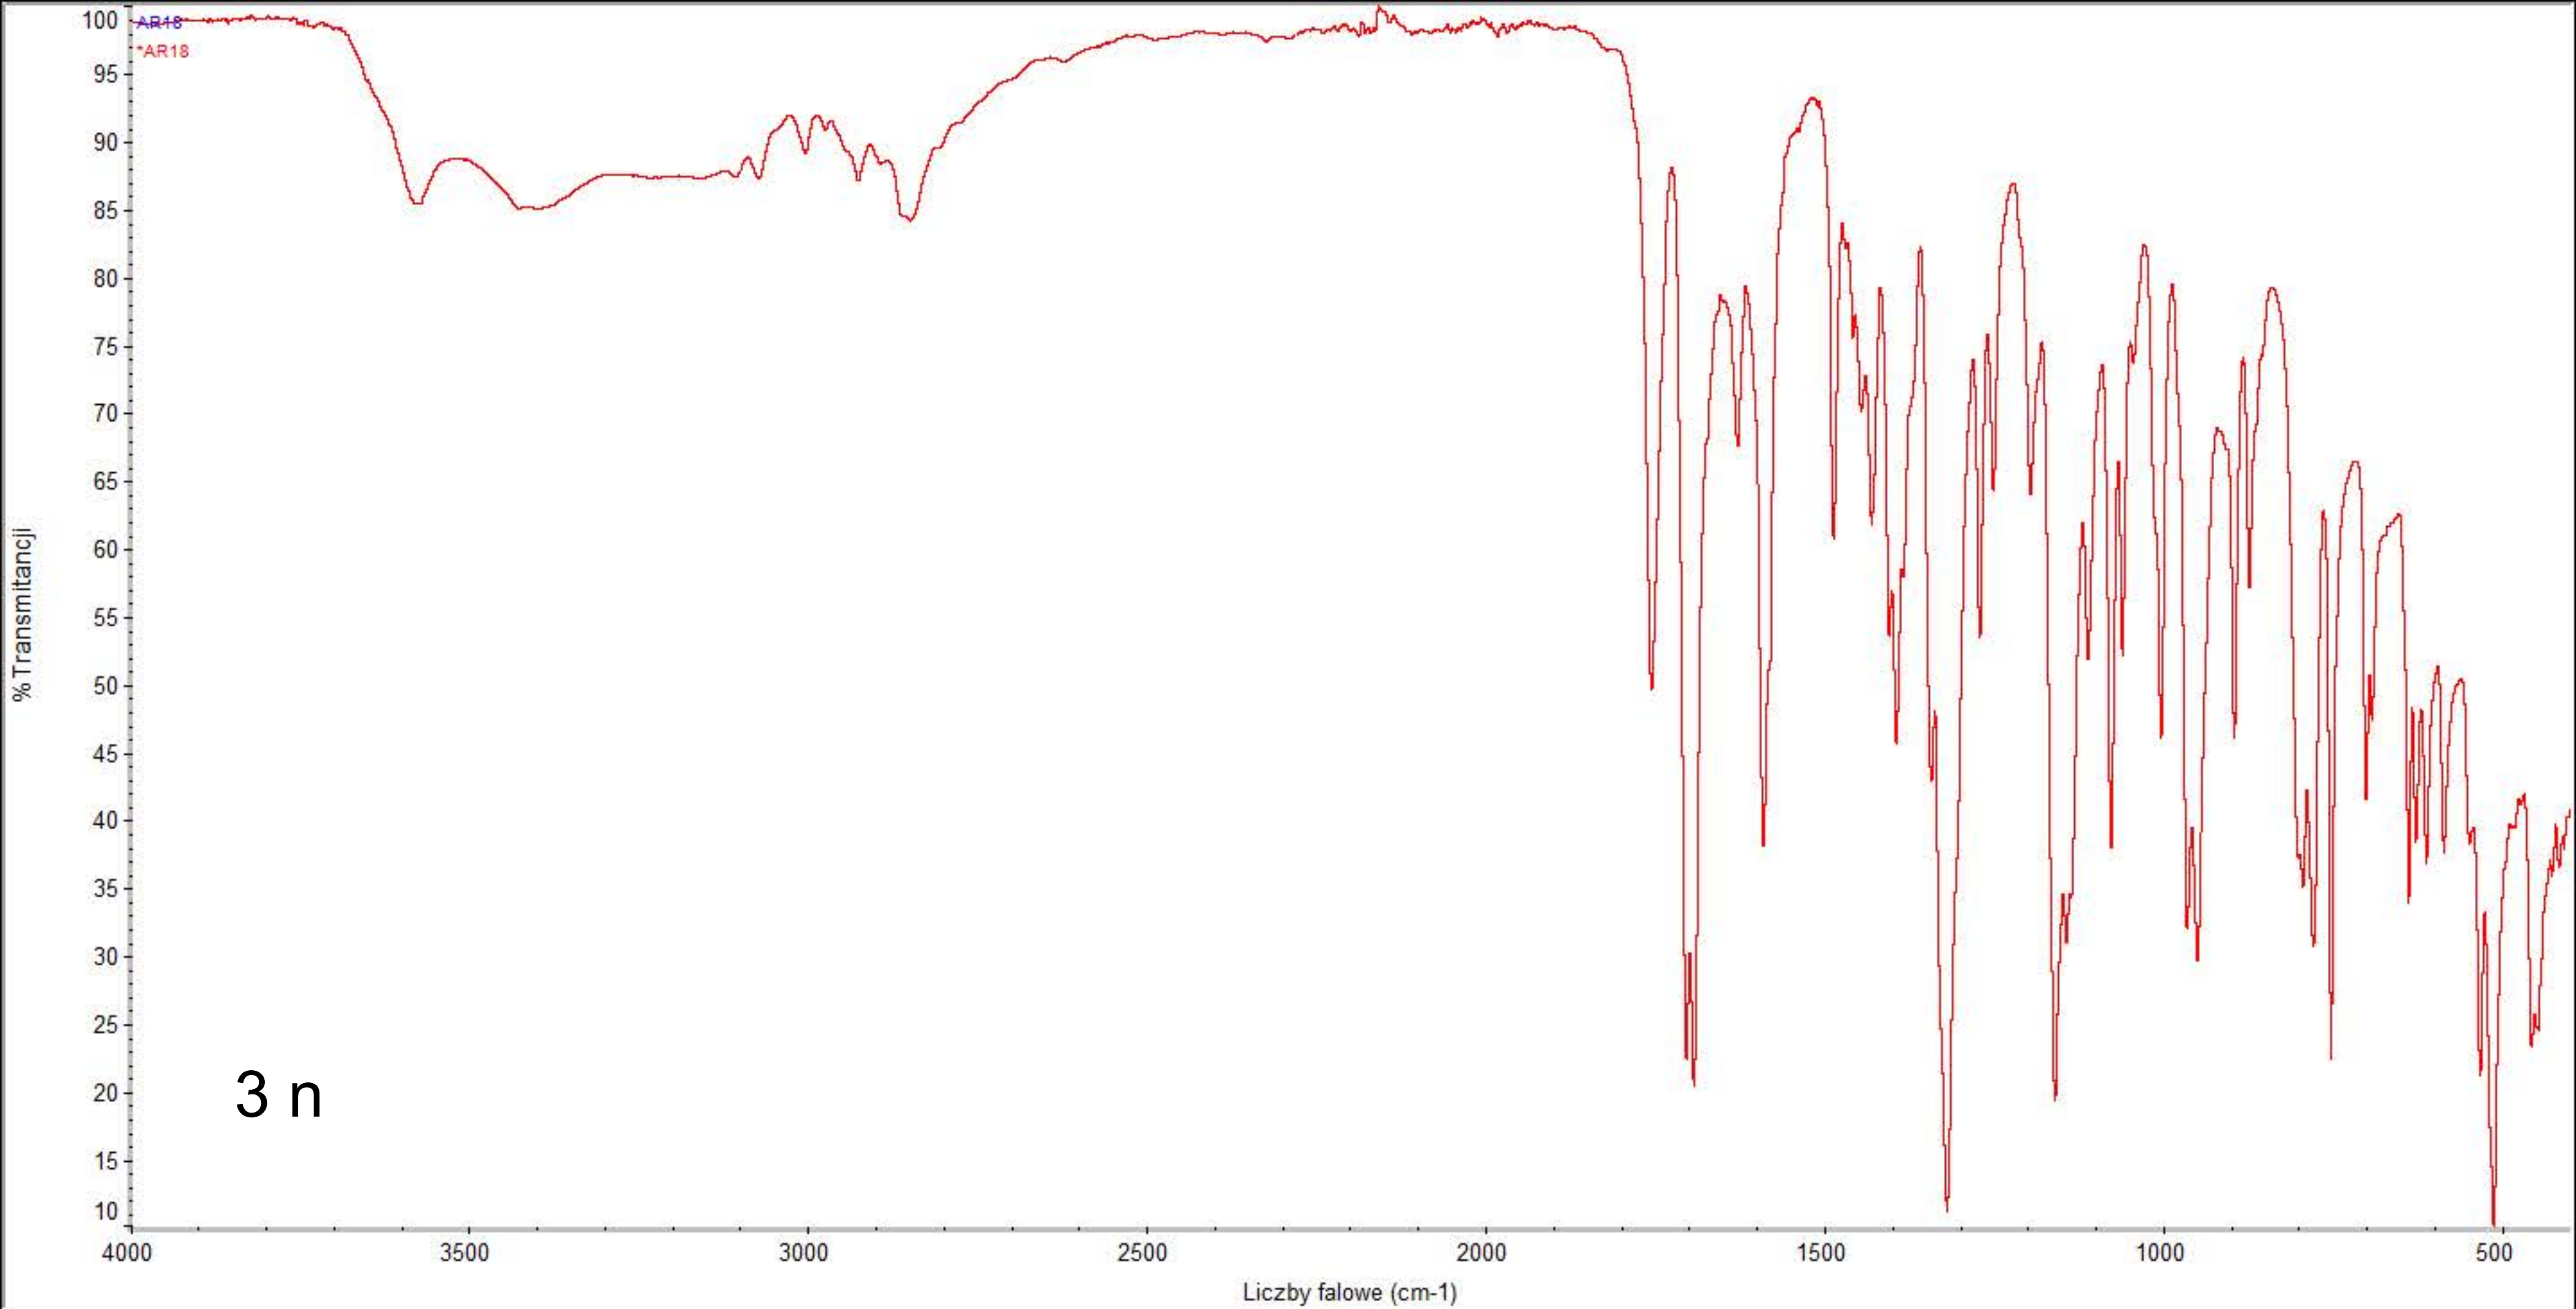



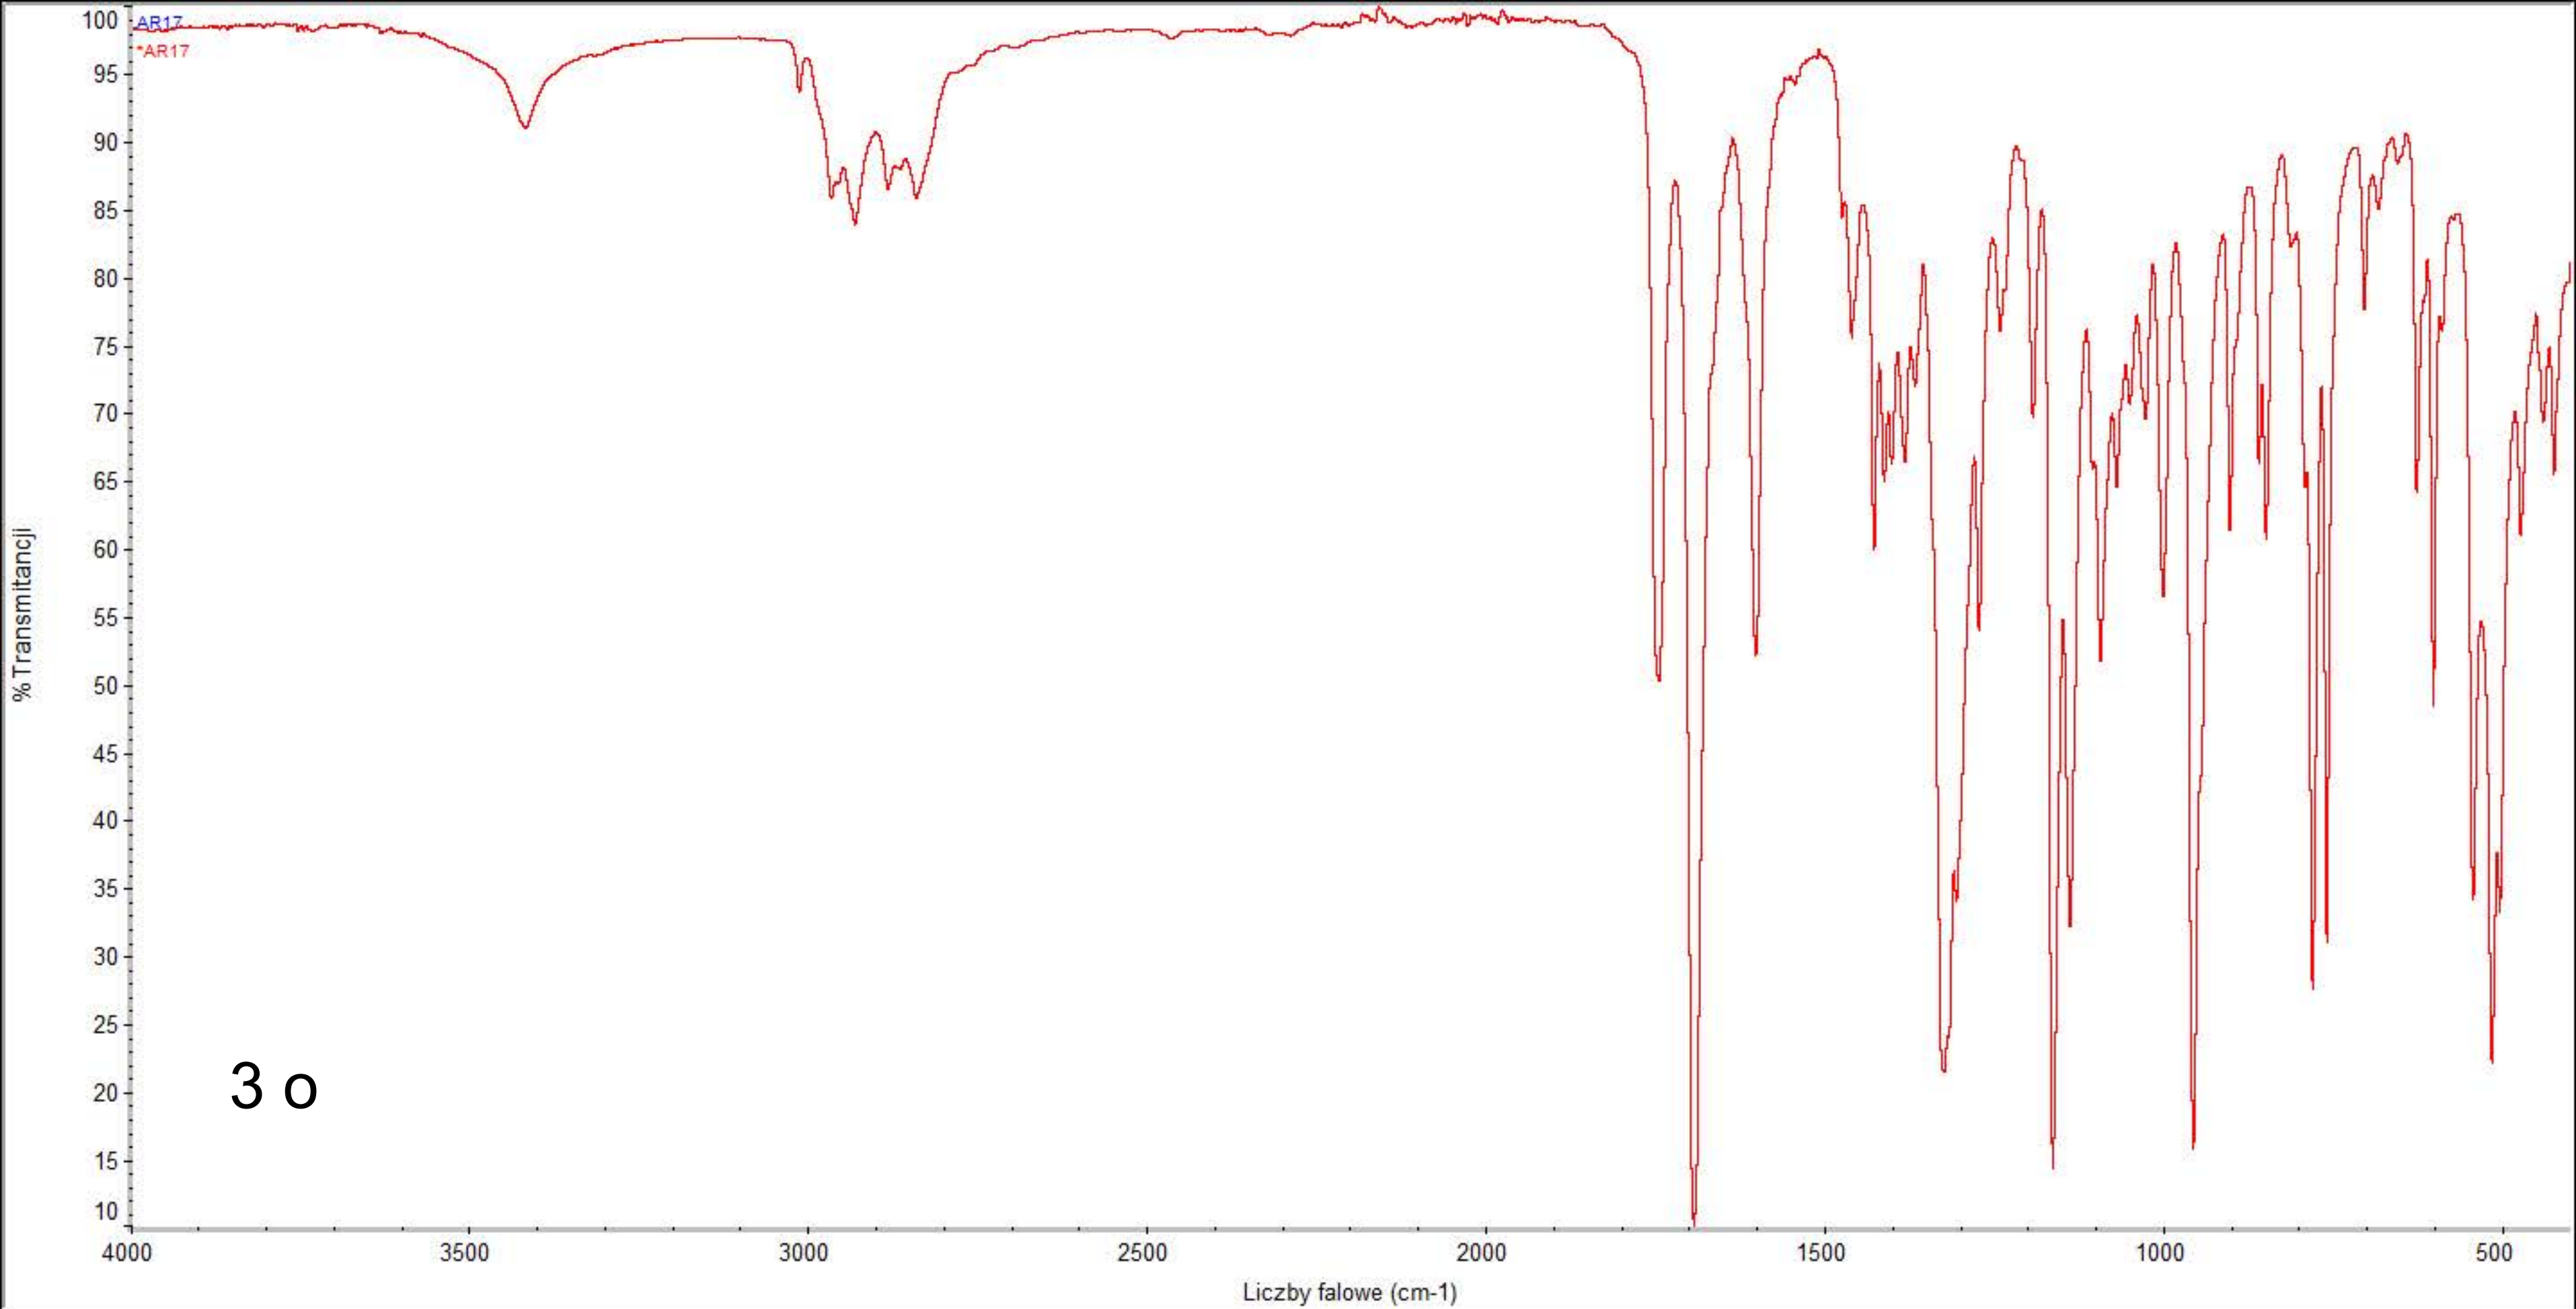

Supplement: s1 [file s1]
